# Supplementary material for: Effectiveness of a sepsis programme in a resource-limited setting: a retrospective analysis of data of a prospective observational study (Ubon-sepsis)
Source: PubMed Central journal article supplement (PMC7896572; doi:10.1136/bmjopen-2020-041022), 2021-02-18
Supplement: bmjopen-2020-041022.draft_revisions.pdf [file bmjopen-2020-041022.draft_revisions.pdf]

# BMJ Open

BMJ Open is committed to open peer review. As part of this commitment we make the peer review history of every article we publish publicly available.

When an article is published we post the peer reviewers' comments and the authors' responses online. We also post the versions of the paper that were used during peer review. These are the versions that the peer review comments apply to.

The versions of the paper that follow are the versions that were submitted during the peer review process. They are not the versions of record or the final published versions. They should not be cited or distributed as the published version of this manuscript.

BMJ Open is an open access journal and the full, final, typeset and author-corrected version of record of the manuscript is available on our site with no access controls, subscription charges or pay-per-view fees (<http://bmjopen.bmj.com>).

If you have any questions on BMJ Open's open peer review process please email [info.bmjopen@bmj.com](mailto:info.bmjopen@bmj.com)

# BMJ Open

## Effectiveness of a sepsis programme implemented in a resource-limited setting: a natural experiment

|                               |                                                                                                                                                                                                                                                                                                                                                                                                                                                                                                                                                                                                                                                                                                                                                                                                                                                                                                                                                                                                                                                                                                                                               |
|-------------------------------|-----------------------------------------------------------------------------------------------------------------------------------------------------------------------------------------------------------------------------------------------------------------------------------------------------------------------------------------------------------------------------------------------------------------------------------------------------------------------------------------------------------------------------------------------------------------------------------------------------------------------------------------------------------------------------------------------------------------------------------------------------------------------------------------------------------------------------------------------------------------------------------------------------------------------------------------------------------------------------------------------------------------------------------------------------------------------------------------------------------------------------------------------|
| Journal:                      | <i>BMJ Open</i>                                                                                                                                                                                                                                                                                                                                                                                                                                                                                                                                                                                                                                                                                                                                                                                                                                                                                                                                                                                                                                                                                                                               |
| Manuscript ID                 | bmjopen-2020-041022                                                                                                                                                                                                                                                                                                                                                                                                                                                                                                                                                                                                                                                                                                                                                                                                                                                                                                                                                                                                                                                                                                                           |
| Article Type:                 | Original research                                                                                                                                                                                                                                                                                                                                                                                                                                                                                                                                                                                                                                                                                                                                                                                                                                                                                                                                                                                                                                                                                                                             |
| Date Submitted by the Author: | 28-May-2020                                                                                                                                                                                                                                                                                                                                                                                                                                                                                                                                                                                                                                                                                                                                                                                                                                                                                                                                                                                                                                                                                                                                   |
| Complete List of Authors:     | Booraphun, Suchart; Sunpasithiprasong Hospital, Medical Department Hantrakun, Viriya; Faculty of Tropical Medicine, Microbiology Siriboon, Suwatthiya; Sunpasithiprasong Hospital Boonsri, Chaiyaporn ; Sunpasithiprasong Hospital, Emergency Department Poomthong, Pulyamon; Sunpasithiprasong Hospital Singkaew, Bung-Orn; Sunpasithiprasong Hospital Wasombat, Oratai; Sunpasithiprasong Hospital Chamnan, Parinya; Sunpasithiprasong Hospital Champunot, Ratapum; Buddhachinaraj Phitsanulok Hospital, Department of Internal Medicine Rudd, Kristina; University of Pittsburgh, Department of Critical Care Medicine Day, Nicholas; Mahidol-Oxford Tropical Medicine Research Unit; University of Oxford, Centre for Tropical Medicine, Nuffield Department of Clinical Medicine Dondorp, Arjen; Mahidol University, Mahidol-Oxford Tropical Medicine Research Unit (MORU), Faculty of Tropical Medicine; University of Oxford, Centre for Tropical Medicine, Nuffield Department of Medicine Teparrukkul, Prapit; Sappasithiprasong Hospital West, Eoin; University of Washington Limmathurotsakul, Direk; Faculty of Tropical Medicine |
| Keywords:                     | Epidemiology < INFECTIOUS DISEASES, INFECTIOUS DISEASES, INTENSIVE & CRITICAL CARE                                                                                                                                                                                                                                                                                                                                                                                                                                                                                                                                                                                                                                                                                                                                                                                                                                                                                                                                                                                                                                                            |
|                               |                                                                                                                                                                                                                                                                                                                                                                                                                                                                                                                                                                                                                                                                                                                                                                                                                                                                                                                                                                                                                                                                                                                                               |

SCHOLARONE™  
Manuscripts

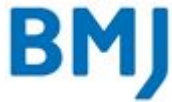

I, the Submitting Author has the right to grant and does grant on behalf of all authors of the Work (as defined in the below author licence), an exclusive licence and/or a non-exclusive licence for contributions from authors who are: i) UK Crown employees; ii) where BMJ has agreed a CC-BY licence shall apply, and/or iii) in accordance with the terms applicable for US Federal Government officers or employees acting as part of their official duties; on a worldwide, perpetual, irrevocable, royalty-free basis to BMJ Publishing Group Ltd ("BMJ") its licensees and where the relevant Journal is co-owned by BMJ to the co-owners of the Journal, to publish the Work in this journal and any other BMJ products and to exploit all rights, as set out in our [licence](#).

The Submitting Author accepts and understands that any supply made under these terms is made by BMJ to the Submitting Author unless you are acting as an employee on behalf of your employer or a postgraduate student of an affiliated institution which is paying any applicable article publishing charge ("APC") for Open Access articles. Where the Submitting Author wishes to make the Work available on an Open Access basis (and intends to pay the relevant APC), the terms of reuse of such Open Access shall be governed by a Creative Commons licence – details of these licences and which [Creative Commons](#) licence will apply to this Work are set out in our licence referred to above.

Other than as permitted in any relevant BMJ Author's Self Archiving Policies, I confirm this Work has not been accepted for publication elsewhere, is not being considered for publication elsewhere and does not duplicate material already published. I confirm all authors consent to publication of this Work and authorise the granting of this licence.

1  
2  
3 **1 Effectiveness of a sepsis programme implemented in a resource-limited setting: a natural**  
4 **experiment**  
5  
6  
7

8  
9  
10  
11 4 Suchart Booraphun MD<sup>1</sup>, Viriya Hantrakun PhD<sup>2</sup>, Suwatthiya Siriboon MD<sup>1</sup>, Chaiyaporn Boonsri  
12 MD<sup>1</sup>, Pulyamon Poomthong MD<sup>1</sup>, Bung-Orn Singkaew BNS<sup>1</sup>, Oratai Wasombat BNS<sup>1</sup>, Parinya  
13 5 MD<sup>1</sup>, Pulyamon Poomthong MD<sup>1</sup>, Bung-Orn Singkaew BNS<sup>1</sup>, Oratai Wasombat BNS<sup>1</sup>, Parinya  
14 Chamna MD, PhD<sup>1</sup>, Ratapum Champunot MD<sup>3</sup>, Kristina Rudd MD, MPH<sup>4, 5</sup>, Nicholas P.J. Day<sup>2,6</sup>  
15 6 MD<sup>2</sup>, PhD, Arjen Dondrop MD<sup>2,6</sup>, PhD, Prapit Teparrukkul MD<sup>1</sup>, T. Eoin West MD, MPH<sup>5</sup>, Direk  
16 7 MD<sup>2</sup>, PhD, Arjen Dondrop MD<sup>2,6</sup>, PhD, Prapit Teparrukkul MD<sup>1</sup>, T. Eoin West MD, MPH<sup>5</sup>, Direk  
17 8 Limmathurotsakul MD, PhD<sup>2,6,7</sup>  
18  
19  
20  
21

22  
23  
24  
25 10 Short Title: Sepsis Fast Track Thailand  
26  
27  
28

29 12 <sup>1</sup>Sunpasitthiprasong Hospital, Ubon Ratchathani, Thailand  
30

31 13 <sup>2</sup>Mahidol Oxford Tropical Medicine Research Unit, Faculty of Tropical Medicine, Mahidol  
32 University, Bangkok, Thailand  
33  
34  
35

36 15 <sup>3</sup>Department of Internal Medicine, Buddhachinaraj Phitsanulok Hospital, Phitsanulok, Thailand  
37

38 16 <sup>4</sup>Department of Critical Care Medicine, University of Pittsburgh, Pittsburgh, Pennsylvania, USA  
39

40 17 <sup>5</sup>Division of Pulmonary, Critical Care, and Sleep Medicine, University of Washington, Seattle,  
41 United States  
42  
43  
44

45 19 <sup>6</sup>Centre for Tropical Medicine and Global Health, Nuffield Department of Medicine, University  
46 of Oxford, Churchill Hospital, Oxford, United Kingdom  
47  
48

49 20  
50 21 <sup>7</sup>Department of Tropical Hygiene, Faculty of Tropical Medicine, Mahidol University, Bangkok,  
51 Thailand  
52  
53  
54  
55  
56  
57  
58  
59  
60

1  
2  
3 23  
4  
5  
6 24 **\*Corresponding author:** Assoc. Prof. Direk Limmathurotsakul, Mahidol-Oxford Tropical  
7  
8 25 Medicines Research Unit, Faculty of Tropical Medicine, Mahidol University, 420/6 Rajvithi Road,  
9  
10 26 Bangkok, 10400, Thailand. Tel: +66 2 203 6333, E-mail: [direk@tropmedres.ac](mailto:direk@tropmedres.ac) (DL)  
11  
12  
13  
14

15 28 **Word count:** abstract 298, text 3,914

16  
17 29 **Number of pages:** 32, Tables: 4; Figures: 3, Supporting Information: 1  
18

19 30 **Keywords:** sepsis, sepsis care, sepsis management, mortality, resource limited setting, natural  
20  
21 31 experiment  
22  
23

24 32  
25  
26  
27  
28  
29  
30  
31  
32  
33  
34  
35  
36  
37  
38  
39  
40  
41  
42  
43  
44  
45  
46  
47  
48  
49  
50  
51  
52  
53  
54  
55  
56  
57  
58  
59  
60

1  
2  
3 **33 Abstract**  
4

5 **34 Objective:** To evaluate the effectiveness of a Sepsis Fast Track programme (SFT) implemented  
6  
7  
8 **35** at a referral hospital  
9

10 **36 Design:** A natural experiment using the data of an observational study on sepsis patients (Ubon-  
11  
12 **37** sepsis) from March 2013 to January 2017  
13

14 **38 Setting:** General medical wards and medical intensive care units (ICUs) of a referral hospital  
15

16 **39 Participants:** 3,716 patients with community-acquired sepsis observed under the Ubon-sepsis  
17  
18  
19 **40** cohort. Sepsis was defined as modified Sequential Organ Failure Assessment (SOFA) score  $\geq 2$ .  
20

21 **41 Interventions:** The SFT was a protocol to identify and initiate sepsis care on hospital admission  
22  
23  
24 **42** and to admit patients directly to the ICUs when available. The SFT implemented at the study  
25  
26 **43** hospital in January 2015.  
27

28 **44 Main outcome measures:** The primary outcome was 28-day mortality. The secondary outcomes  
29  
30  
31 **45** were measured sepsis management.  
32

33 **46 Results:** Of 3,716 patients with community-acquired sepsis, 899 were detected and enrolled in the  
34  
35 **47** SFT of the study hospital (SFT group) and 2,817 received standard of care (control group). Patients  
36  
37  
38 **48** in the SFT group had more organ dysfunction, were more likely to receive measured sepsis  
39  
40 **49** management and to be admitted directly to the ICUs. 28-day mortality was 23% (205/899) in the  
41  
42 **50** SFT group and 20% (560/2,817) in the control group. In the primary analysis, patients in the SFT  
43  
44 **51** group were more likely to survive (adjusted hazard ratio for death 0.70; 95%CI 0.57-0.86,  
45  
46  
47 **52**  $p < 0.001$ ) adjusted for admission year, gender, age, comorbidities, organ dysfunctions and direct  
48  
49 **53** admission to the ICUs. An interaction test showed that the effect of the SFT programme was not  
50  
51 **54** influenced by direct admission to the ICUs ( $p = 0.71$ ).  
52  
53  
54  
55  
56  
57  
58  
59  
60

1  
2  
3 55 **Conclusions:** An implementation of SFT programme can improve sepsis care and reduce mortality  
4  
5 56 of sepsis patients in rural Thailand, where some critical care resources are limited. The survival  
6  
7 57 benefit is present even when patients could not be admitted directly into the ICUs.  
8  
9

10 58 **Study registration number:** NCT02217592  
11  
12  
13 59  
14  
15

### 16 60 **Strengths and limitations of this study**

- 17  
18 61 • The study estimated the interventional effect of an implementation of sepsis protocol in a  
19  
20 62 tropical resource-limited setting by utilizing a natural experiment study design and data  
21  
22 63 from a large prospective observational study.  
23  
24  
25 64 • This study had the control group from both pre and post-intervention periods, and  
26  
27 65 estimated the interventional effect by adjusting for important confounding factors which  
28  
29 66 were systematically measured throughout the study period.  
30  
31  
32 67 • The study hospital was a referral tertiary-care hospital in Thailand, and our findings may  
33  
34 68 have limited generalizability to the more restricted resources settings in other LMICs.  
35  
36  
37  
38  
39  
40  
41  
42  
43  
44  
45  
46  
47  
48  
49  
50  
51  
52  
53  
54  
55  
56  
57  
58  
59  
60

## 69 INTRODUCTION

70 Sepsis is defined as life-threatening organ dysfunction caused by a dysregulated host response to  
71 infection,<sup>1</sup> and is the primary cause of death from infection, especially if not recognized and treated  
72 promptly.<sup>2-4</sup> Sepsis is a major cause of health loss worldwide and is associated with approximately  
73 eleven million deaths each year, most of which occur in low and middle-income countries  
74 (LMICs).<sup>5</sup> The United Nations World Health Assembly has recognized sepsis as a global health  
75 priority and adopted a resolution on improving its worldwide prevention, diagnosis and  
76 management.<sup>6</sup> Comprehensive guidelines such as those developed by the Surviving Sepsis  
77 Campaign have been associated with reduced mortality in high-income countries,<sup>2-4</sup> but  
78 effectiveness of these guidelines in LMICs needs more evaluation.<sup>7-10</sup>

79  
80 Following the Surviving Sepsis Campaign (SSC) 2012,<sup>11</sup> the Ministry of Public Health Thailand  
81 and the Thai Society of Critical Care Medicine developed local recommendations on sepsis based  
82 on resource availability and local context.<sup>12</sup> The recommendations suggest that secondary-care and  
83 tertiary-care hospitals in the country should develop a Sepsis Fast Track (SFT) so that, on  
84 presentation, sepsis patients can be identified, treated and directly admitted to the ICUs when  
85 available. One small retrospective study showed lower mortality among sepsis patients enrolled  
86 than those not enrolled in the SFT (21% vs. 43%) at the study hospital,<sup>13</sup> while the other study did  
87 not find an association between SFT and mortality outcome.<sup>14</sup> Those studies are subject to  
88 selection biases due to their retrospective nature.<sup>13 14</sup> Interventional studies to randomize patients  
89 to receive or not receive the SFT, however, would be unethical and impractical after the national  
90 recommendations.



1  
2  
3 91  
4  
5 92 It is increasingly recommended to evaluate the impact of healthcare interventions using routine  
6  
7 93 data, particularly when a wide range of routinely collected data is available.<sup>15</sup> A few methods can  
8  
9  
10 94 be used to perform an impact evaluation; including natural experiments (for natural or unplanned  
11  
12 95 interventions), or quasi experiments (for planned or intentional interventions). Natural experiment  
13  
14 96 studies have certain advantages when it is impossible to manipulate exposure to the intervention.<sup>16</sup>  
15  
16  
17 97 Nonetheless, a natural experiment study requires a good understanding of the process determining  
18  
19 98 exposure to the intervention, a careful choice and combination of analytical methods, and  
20  
21 99 transparent reporting.<sup>16</sup>  
22  
23

24 100  
25  
26 101 Here, we developed a natural experiment study by using data from our prospective observational  
27  
28 102 study of community-acquired sepsis patients presenting to a referral hospital in Thailand over four  
29  
30 103 years (from March 2013 to January 2017)<sup>17 18</sup> to evaluate the effectiveness of a SFT programme  
31  
32  
33 104 which was implemented at the study hospital in January 2015. The study is defined as a natural  
34  
35 105 experiment because the detection and enrollment of patients in to the SFT programme and  
36  
37 106 admission to the ICUs were neither manipulated nor influenced by the research team of the  
38  
39 107 observational study.<sup>17 18</sup> The design, analysis and reporting of this study follow the guideline on  
40  
41  
42 108 natural experiments recently published.<sup>16</sup>  
43  
44

45 109  
46  
47  
48  
49  
50  
51  
52  
53  
54  
55  
56  
57  
58  
59  
60

## 110 MATERIAL AND METHODS

### 111 Trial design

112 In this natural experiment, we evaluated the effectiveness of the SFT programme by using the data  
113 of a prospective observational study (Ubon-sepsis).<sup>17 18</sup> The SFT programme was implemented at  
114 the study hospital in January 2015. The SFT programme at the study hospital included (1)  
115 diagnostic criteria for attending physicians and medical teams to systematically identify sepsis  
116 patients on hospital admission (Supplementary Table 1), (2) a recommended sepsis care protocol  
117 and (3) direct admission to the ICUs when available. The SFT programme at the study hospital  
118 was generated by the SFT committee of the study hospital (S.B., S.S., C.B., P.P., B.S., O.W., P.C.  
119 and P.T.) based on SSC 2012,<sup>11</sup> resource availability and local context.<sup>12</sup>

120  
121 Details of the Ubon-sepsis cohort have been published elsewhere.<sup>17 18</sup> In short, the Ubon-sepsis  
122 research team, who were not attending physicians or medical teams at the study hospital,  
123 conducted a prospective observational study of community-acquired infections and sepsis from  
124 March 2013 to January 2017.<sup>17 18</sup> The research team prospectively enrolled adult patients  $\geq 18$   
125 years old who were admitted to the general medical wards and medical intensive care units (ICUs)  
126 with a primary diagnosis of infection made by the attending physician, were within 24 hours of  
127 admission to the study hospital, and had three of 20 systemic manifestations of infection  
128 documented in the medical records (Supplementary Table 2). The 20 systemic manifestations of  
129 the infections were consolidated from the 22 variables proposed as diagnostic criteria for sepsis  
130 for SSC 2012.<sup>11</sup> The study team sequentially screened all medical patients by reviewing admission  
131 logs in the emergency department (ED), medical wards, and medical ICUs twice daily (morning

1  
2  
3 132 and afternoon) on each working day. The Ubon-sepsis cohort was initiated in 2012 prior to the  
4  
5 133 implementation of SFT at the study hospital. The research team were not involved in any clinical  
6  
7  
8 134 interventions; enrollment in the SFT programme and all medical treatment was performed by  
9  
10 135 attending physicians and medical teams. The research team did not adjust the study protocol,  
11  
12 136 inclusion criteria and exclusion criteria of the Ubon-sepsis cohort during the entire study period,  
13  
14  
15 137 and the research team recorded whether participants in the Ubon-sepsis cohort were enrolled in  
16  
17 138 the SFT programme.  
18

19 139  
20  
21 140 This study was defined as a natural experiment study using the definitions that (1) the intervention  
22  
23 141 (enrollment in the SFT programme) was not undertaken for the purposes of research (Ubon-sepsis  
24  
25 142 cohort), and (2) the variation in exposure (decision to enroll in the SFT programme) and outcomes  
26  
27 143 were analysed using methods that attempt to make causal inferences.<sup>16</sup>  
28  
29  
30

31 144  
32  
33 145 The reporting of this study follows the CONSORT guidelines and the guideline on natural  
34  
35 146 experiments recently published.<sup>16</sup> Written, informed permission was obtained from participants  
36  
37 147 prior to enrollment in the Ubon-sepsis cohort.  
38  
39

40 148  
41  
42 149 **Participants**  
43  
44 150 For this study, we evaluated patients who were included into the Ubon-sepsis cohort and had  
45  
46 151 community-acquired sepsis. Sepsis was defined as an infection with organ dysfunction in  
47  
48 152 accordance with the 2016 international Consensus (Sepsis-3) guidelines for sepsis.<sup>1</sup> Organ  
49  
50 153 dysfunction was determined by a modified sequential (sepsis-based) organ failure assessment  
51  
52  
53  
54  
55  
56  
57  
58  
59  
60

1  
2  
3 154 (SOFA) score  $\geq 2$  as previously described.<sup>17 18</sup> The Ubon-sepsis cohort excluded patients who were  
4  
5 155 suspected of having hospital-acquired infections (determined by the attending physician),  
6  
7 156 hospitalized within 30 days prior to the current admission, or hospitalized in other hospital longer  
8  
9  
10 157 than 72 hours prior to study hospital admission.  
11

12 158

### 159 **Study group assignment and blinding**

160 All patients included in the Ubon-sepsis cohort from March 2013 to December 2014 were  
161 designated as the control group. Patients included in the Ubon-sepsis cohort from January 2015 to  
162 January 2017 who received standard of care or were assigned to the SFT programme by attending  
163 medical teams using their criteria on admission (Supplementary Table 1) were designated as  
164 additional controls or as the SFT group, respectively. The Ubon-sepsis research team were not  
165 involved in decision-making regarding enrollment to the SFT programme. Due to the nature of the  
166 intervention, there was no blinding. All attending physicians and medical teams in the ED, OPD  
167 and admission awards were informed whether patients were enrolled in SFT programme.

168

### 169 **Interventions**

170 Patients in the control group received standard care according to local guidelines. Patients in the  
171 SFT group received the standard of care along with a recommended sepsis care protocol of the  
172 SFT programme. First, preprinted recommended doctor orders for the SFT programme were used  
173 as of January 2015 (Supplementary Figure 1). The recommended orders included oxygen  
174 administration, intravenous fluid loading and fluid administration to achieve the recommended  
175 target of 30 mL/kg crystalloid, blood culture, recommended stat (immediate) doses and choices of

1  
2  
3 176 parenteral antibiotics including ceftriaxone, ceftazidime, cloxacillin, metronidazole and  
4  
5 177 gentamycin, contact ICU for ICU admission (if available), oxygen supplementation, close  
6  
7 178 monitoring of vital signs and urine output, and a set of diagnostic tests including chest radiography,  
8  
9  
10 179 electrocardiogram, rapid blood glucose test, serum lactate, complete blood count, blood urea  
11  
12 180 nitrogen, creatinine, electrolytes, liver function tests, albumin level, prothrombin time and partial  
13  
14 181 thromboplastin time. Second, as of March 2016, the resuscitation workflow to normalize and  
15  
16 182 maintain a mean arterial pressure (MAP)  $\geq 65$  mmHg, systolic blood pressure (SBP)  $\geq 90$  mmHg  
17  
18 183 and urine output  $\geq 0.5$  mL/kg/hr within the first six hours was formally implemented and  
19  
20 184 recommended (Supplementary Figure 2). The resuscitation workflow included fluid resuscitation,  
21  
22 185 measurement of central venous pressure (CVP) and central venous oxygen saturation (SCVO<sub>2</sub>),  
23  
24 186 administration of adrenergic agents, blood transfusion for haematocrit  $< 30\%$  and hydrocortisone  
25  
26 187 if adequate fluid resuscitation and vasopressor therapy could not restore hemodynamic stability.  
27  
28 188 The resuscitation workflow was pre-printed and included in the clinical chart of every SFT patient  
29  
30 189 (together with pre-printed doctor's order), and was recommended even if patients could not be  
31  
32 190 admitted directly to the ICU. A separate set of documents, recommended management and  
33  
34 191 recommended frequency of vital signs monitoring for nurses (i.e. nurse notes for SFT patients)  
35  
36 192 were also used for every SFT patient. Preparation and regular meetings to implement and monitor  
37  
38 193 SFT programme were organized by the SFT committee of Sunpasithiprasong Hospital.  
39  
40  
41  
42  
43  
44  
45  
46

## 47 **Outcome measures**

48  
49 196 The primary outcome measure was 28-day mortality as recorded in the Ubon-sepsis cohort.<sup>17</sup> 28-  
50  
51 197 day mortality data were collected via telephone contact if subjects were no longer hospitalized and  
52  
53  
54  
55  
56  
57  
58  
59  
60

1  
2  
3 198 had been discharged alive.<sup>17</sup> The secondary outcome measures were sepsis management  
4  
5 199 interventions; including antibiotics administration, blood cultures, mechanical ventilation,  
6  
7 200 adrenergic agents, acute haemodialysis and placement of a urinary catheter within the first day of  
8  
9  
10 201 hospitalization.<sup>17 18</sup>  
11

12 202

### 14 203 **Sample size**

16  
17 204 The sample size of the study was determined by the sample size of Ubon-sepsis cohort. In this  
18  
19 205 natural experiment study, we estimated that about 50% of 3,716 sepsis patients in the Ubon-sepsis  
20  
21 206 cohort were enrolled after the implementation of SFT programme, of which 50% were enrolled in  
22  
23 207 the SFT programme (i.e. 794 and 2,382 patients were estimated to be the intervention and control  
24  
25 208 group, respectively). We assumed that the mortality of the control group was 21% as previously  
26  
27 209 published.<sup>17 18</sup> With a risk of type I error of 5% and a type II error of 20%, we calculated that our  
28  
29 210 data set (n=3,716) would provide adequate power to detect the mortality difference if the mortality  
30  
31 211 ratio in the SFT group compared with the control group was 0.78.  
32

33 212

### 34 213 **Statistical analysis**

35  
36 214 All sepsis patients were included in the analysis regardless of whether they were enrolled before  
37  
38 215 or after the implementation of the SFT programme. We used the Chi-square test and Mann-  
39  
40 216 Whitney test to compare the proportions of binary variables and median of continuous variables  
41  
42 217 between groups, respectively. The interquartile range is presented as 25<sup>th</sup> and 75<sup>th</sup> percentiles.  
43  
44  
45  
46  
47  
48

49 218

1  
2  
3 219 In the primary analysis, we used multivariable Cox proportional hazard models to evaluate the  
4  
5 220 effectiveness of SFT programme on 28-day mortality. The multivariable Cox proportional hazard  
6  
7 221 model was used to adjust the difference between those receiving the intervention and the others  
8  
9  
10 222 for the natural experiment.<sup>16</sup> To reduce bias in the model development, we used the previous  
11  
12 223 multivariable Cox proportional hazard model as the base model,<sup>17</sup> added the intervention variable  
13  
14 224 and direct admission to the ICU, and modified by adding a time variable to represent possible  
15  
16 225 changes over time and by using continuous modified SOFA score on admission rather than as a  
17  
18 226 binary variable (modified SOFA score  $\geq 2$ ). Due to a very small number of patients enrolled in  
19  
20 227 early 2017 (n=28), we considered them as enrolled in 2016. The continuous modified SOFA score  
21  
22 228 was used to improve regression adjustment for disease severity of the model. The other variables  
23  
24 229 included in the model were gender, age group, transfer from other hospital, comorbidities (diabetes  
25  
26 230 mellitus, chronic kidney disease, liver disease and malignancy) and blood culture positive for  
27  
28 231 pathogenic organisms. We tested potential predefined interactions between intervention and direct  
29  
30 232 admission to the ICUs. The goodness of fit for the multivariable Cox proportional hazard model  
31  
32 233 was tested with a Hosmer and Lemeshow test. Number needed to treat (NNT) was defined as the  
33  
34 234 number of sepsis patients needed to be included in the SFT to avert one 28-day mortality. The  
35  
36 235 NNT was estimated by using estimated hazard ratio from Cox proportional hazard model as  
37  
38 236 described previously.<sup>19</sup>  
39  
40  
41  
42  
43  
44  
45

46 238 For the secondary endpoints, we used multivariable logistic regression models with similar  
47  
48 239 independent variables as the model for 28-mortality outcome and used each sepsis management  
49  
50 240 process as an outcome. The multivariable logistic regression models were used to adjust for  
51  
52  
53  
54  
55  
56  
57  
58  
59  
60

1  
2  
3 241 difference in characteristics and disease severity of the patients in each group. We preformed  
4  
5 242 sensitivity analyses by excluding patients enrolled prior to the implementation of the SFT  
6  
7  
8 243 programme. We also performed another sensitivity analysis by replacing direct admission to the  
9  
10 244 ICUs with admission to the ICUs within the first hospital day. All analyses were performed with  
11  
12 245 STATA 15.1 (StataCorp, College Station, TX, USA).  
13  
14  
15 246

### 16 17 247 **Patient and public involvement**

18  
19 248 No patients were involved in setting the research question or the outcome measures, nor were they  
20  
21 249 involved in developing plans for recruitment, design, or implementation of the study. No patients  
22  
23  
24 250 were asked to advice on interpretation or writing the results. The trial results will be disseminated  
25  
26 251 to the public through online social media.  
27  
28  
29 252

## 30 31 253 **RESULTS**

### 32 33 254 **Baseline characteristics**

34  
35 255 The observational cohort study (Ubon-sepsis) included 5,001 patients presenting with community-  
36  
37 256 acquired infections from March 2013 to January 2017. 3,716 (74%) met criteria for sepsis within  
38  
39  
40 257 the first 24 hours of admission with a modified SOFA score  $\geq 2$ , and were included for this natural  
41  
42 258 experiment study. Figure 1 shows the flow of participants through the study. Among 3,716 sepsis  
43  
44  
45 259 patients, 899 were enrolled in the SFT programme and defined as the SFT group, and 2,817 were  
46  
47 260 not enrolled in the SFT programme, received standard of care, and defined as the control group.  
48  
49 261 Of 2,817 sepsis patients in the control group, 1,599 were included in the observational cohort study  
50  
51  
52  
53  
54  
55  
56  
57  
58  
59  
60



262 prior to the implementation of SFT programme and 1,218 were after the implementation of the  
263 programme.

264  
265 Table 1 shows the characteristic of the study patients. Patients in the SFT group were older and  
266 more likely to have underlying diseases of diabetes mellitus, cerebrovascular diseases and  
267 dyslipidemia. Patients included in the SFT group had higher severity of organ dysfunction  
268 determined by the modified SOFA score compared with the control group (median 6 [IQR 4-8]  
269 vs. 4 [IQR 3-6],  $p < 0.001$ ). A higher proportion of patients in the SFT group were admitted directly  
270 to the ICU compared with the control group (19% vs 5%,  $p < 0.001$ ).

271  
272 **Table 1| Baseline characteristics of sepsis patients enrolled in the Sepsis Fast Track**  
273 **programme<sup>1</sup> (SFT group) or standard of care (control group). Values are number**  
274 **(percentages) unless stated otherwise**

| Characteristics            | SFT group <sup>2</sup><br>(n=899) | Control group <sup>3</sup><br>(n=2817) | P value |
|----------------------------|-----------------------------------|----------------------------------------|---------|
| Male gender                | 523 (58%)                         | 1616 (57%)                             | 0.70    |
| Age (years) (median [IQR]) | 63 (49-74)                        | 56 (39-70)                             | <0.001  |
| <b>Age group (years)</b>   |                                   |                                        |         |
| 18-40                      | 98 (11%)                          | 628 (22%)                              | <0.001  |
| >40-60                     | 277 (31%)                         | 858 (30%)                              |         |
| >60-70                     | 214 (24%)                         | 501 (18%)                              |         |
| >70                        | 310 (34%)                         | 830 (29%)                              |         |
| <b>Comorbidities</b>       |                                   |                                        |         |
| Hypertension               | 239 (27%)                         | 696 (25%)                              | 0.26    |
| Diabetes mellitus          | 213 (24%)                         | 575 (20%)                              | 0.04    |
| Chronic kidney disease     | 129 (14%)                         | 386 (14%)                              | 0.63    |
| Dyslipidemia               | 66 (7%)                           | 145 (5%)                               | 0.01    |
| Heart disease              | 47 (5%)                           | 177 (6%)                               | 0.25    |

| Characteristics                                        | SFT group <sup>2</sup><br>(n=899) | Control group <sup>3</sup><br>(n=2817) | P value          |
|--------------------------------------------------------|-----------------------------------|----------------------------------------|------------------|
| Lung disease                                           | 65 (7%)                           | 227 (8%)                               | 0.42             |
| Liver disease                                          | 33 (4%)                           | 91 (3%)                                | 0.52             |
| Cerebrovascular disease                                | 29 (3%)                           | 54 (2%)                                | 0.02             |
| Malignancy                                             | 13 (1%)                           | 44 (2%)                                | 0.81             |
| Human immunodeficiency virus (HIV)                     | 6 (1%)                            | 31 (1%)                                | 0.26             |
| <b>Organ dysfunction</b>                               |                                   |                                        |                  |
| Modified SOFA score (median [IQR])                     | 6 (4-8)                           | 4 (3-6)                                | <0.001           |
| Renal dysfunction <sup>4</sup>                         | 705 (78%)                         | 1814 (64%)                             | <0.001           |
| Cardiovascular dysfunction <sup>4</sup>                | 800 (89%)                         | 1374 (49%)                             | <0.001           |
| Coagulation dysfunction <sup>4</sup>                   | 391 (43%)                         | 1467 (52%)                             | <0.001           |
| Liver dysfunction <sup>4</sup>                         | 311 (35%)                         | 818 (29%)                              | 0.002            |
| Respiratory dysfunction <sup>4</sup>                   | 287 (32%)                         | 600 (21%)                              | <0.001           |
| Central nervous system dysfunction <sup>4</sup>        | 166 (18%)                         | 523 (19%)                              | 0.96             |
| <b>Transferred from other hospitals</b>                | <b>874 (97%)</b>                  | <b>2372 (84%)</b>                      | <b>&lt;0.001</b> |
| <b>Duration of symptoms (median [IQR])</b>             | <b>2 (1-3)</b>                    | <b>3 (1-5)</b>                         | <b>&lt;0.001</b> |
| ≤ 2 days                                               | 503 (56%)                         | 1157 (41%)                             |                  |
| 3-7 days                                               | 361 (40%)                         | 1445 (51%)                             |                  |
| > 7 days                                               | 35 (4%)                           | 215 (8%)                               |                  |
| <b>Presenting clinical syndromes<sup>5</sup></b>       |                                   |                                        |                  |
| Septic shock                                           | 686 (76%)                         | 730 (26%)                              | <0.001           |
| Acute febrile illness                                  | 205 (23%)                         | 918 (33%)                              | <0.001           |
| Lower respiratory infection                            | 221 (25%)                         | 839 (30%)                              | 0.003            |
| Sepsis                                                 | 223 (25%)                         | 265 (9%)                               | <0.001           |
| Others                                                 | 13 (1%)                           | 446 (16%)                              | <0.001           |
| Diarrheal illness                                      | 150 (17%)                         | 261 (9%)                               | <0.001           |
| <b>Admitted directly to an ICU upon admission</b>      | <b>169 (19%)</b>                  | <b>128 (5%)</b>                        | <b>&lt;0.001</b> |
| <b>Admitted to an ICU within 24 hours of admission</b> | <b>267 (30%)</b>                  | <b>360 (13%)</b>                       | <b>&lt;0.001</b> |
| <b>Blood culture positive for pathogenic organisms</b> | <b>176 (20%)</b>                  | <b>435 (15%)</b>                       | <b>0.002</b>     |
| <b>Year</b>                                            |                                   |                                        |                  |
| 2013                                                   | N/A                               | 790 (28%)                              | <0.001           |
| 2014                                                   | N/A                               | 809 (29%)                              |                  |
| 2015                                                   | 355 (39%)                         | 634 (23%)                              |                  |
| 2016                                                   | 532 (59%)                         | 568 (20%)                              |                  |
| 2017                                                   | 12 (1%)                           | 16 (1%)                                |                  |

275

1  
2  
3 276 <sup>1</sup> SFT programme was implemented at the study hospital in January 2015. This natural experiment evaluated patients  
4  
5 277 in the Ubon-sepsis cohort from March 2013 to January 2017.

6  
7 278 <sup>2</sup> 899 patients of the Ubon-sepsis cohort were enrolled in SFT programme after the implementation of the SFT  
8  
9 279 programme (Figure 1)

10  
11 280 <sup>3</sup> Included 1,599 and 1,218 patients in the Ubon-sepsis cohort before and after the implementation of the SFT  
12  
13 281 programme, respectively.

14  
15 282 <sup>4</sup> Organ dysfunction defined as modified SOFA score was  $\geq 1$  for each organ system.<sup>17</sup>

16  
17 283 <sup>5</sup> Patients may have more than one presenting clinical syndrome.

18  
19 284

## 20 21 285 **Primary outcomes**

22  
23  
24 286 The primary outcome, mortality within 28 days, occurred in 205 of 899 (23%) in the SFT group  
25  
26 287 and 560 of 2,871 (20%) in the control group. In an unadjusted comparison, there was a borderline  
27  
28 288 evidence showing that 28-day mortality of the SFT group was higher than control group (23% vs  
29  
30 289 20%,  $p=0.06$ ). In the primary analysis, the risk of mortality was 30% lower in the SFT group  
31  
32 290 compared to the control group (adjusted hazard ratio [aHR] 0.70, 95% CI 0.57-0.86,  $p<0.001$ ;  
33  
34 291 Table 2) adjusted for baseline characteristics, severity of sepsis and direct admission the ICUs.  
35  
36 292 Older age, high modified SOFA score, underlying disease of malignancy, blood culture positive  
37  
38 293 for pathogenic organisms and direct admission to the ICUs were associated with mortality  
39  
40 294 outcome.  
41  
42  
43

44  
45 295  
46  
47  
48  
49  
50  
51  
52  
53  
54  
55  
56  
57  
58  
59  
60

296 **Table 2| Factors associated with 28-day mortality using multivariable Cox proportional**  
 297 **hazards model**

| Variables                                              | Died<br>(n=765) | Survived<br>(n=2951) | Adjusted hazard ratio<br>(95%CI) | P value |
|--------------------------------------------------------|-----------------|----------------------|----------------------------------|---------|
| <b>SFT group<sup>1</sup></b>                           | 205 (27%)       | 694 (24%)            | 0.70 (0.57- 0.86)                | <0.001  |
| <b>Male gender</b>                                     | 473 (58%)       | 2186 (52%)           | 0.91 (0.78- 1.06)                | 0.21    |
| <b>Age group (years) (n [%])</b>                       |                 |                      |                                  |         |
| • 18-40                                                | 68 (8%)         | 1072 (26%)           | 1.0                              | <0.001  |
| • >40-60                                               | 235 (29%)       | 1308 (31%)           | 1.72 (1.28- 2.30)                |         |
| • >60-70                                               | 164 (20%)       | 745 (18%)            | 2.12 (1.56- 2.88)                |         |
| • >70                                                  | 352 (43%)       | 1045 (25%)           | 3.30 (2.48- 4.39)                |         |
| <b>Transferred from other hospital</b>                 | 749 (91%)       | 3067 (74%)           | 1.23 (1.20- 1.25)                | 0.07    |
| <b>Modified SOFA score (median, IQR)</b>               | 7 (4-9)         | 4 (3-6)              | 1.23 (1.20- 1.25)                | <0.001  |
| <b>Comorbidities</b>                                   |                 |                      |                                  |         |
| • Diabetes mellitus                                    | 213 (26%)       | 793 (19%)            | 1.08 (0.91- 1.28)                | 0.37    |
| • Chronic kidney disease                               | 142 (17%)       | 403 (10%)            | 1.22 (1.01- 1.48)                | 0.04    |
| • Liver disease                                        | 39 (5%)         | 94 (2%)              | 1.31 (0.94- 1.82)                | 0.11    |
| • Malignancy                                           | 25 (3%)         | 57 (1%)              | 2.72 (1.78- 4.16)                | <0.001  |
| <b>Blood culture positive for pathogenic organisms</b> | 221 (29%)       | 390 (13%)            | 1.90 (1.62- 2.22)                | <0.001  |
| <b>Year</b>                                            |                 |                      |                                  |         |
| • 2013                                                 | 165 (22%)       | 625 (21%)            | 1                                | 0.35    |
| • 2014                                                 | 177 (23%)       | 632 (21%)            | 1.00 (0.81- 1.24)                |         |
| • 2015                                                 | 203 (27%)       | 786 (27%)            | 1.03 (0.82- 1.29)                |         |
| • 2016 <sup>2</sup>                                    | 220 (29%)       | 908 (31%)            | 0.87 (0.69- 1.09)                |         |
| <b>Direct admission to the ICU</b>                     | 128 (17%)       | 169 (6%)             | 1.70 (1.38- 2.09)                | <0.001  |

298 <sup>1</sup> Enrolled in the Sepsis Fast Track (SFT) programme

299 <sup>2</sup> Included 28 patients in 2017

300

1  
2  
3 301 In a pre-specified interaction test, we found consistency of the intervention when stratifying by  
4  
5 302 direct admission to the ICUs (interaction test  $p=0.71$ ). In the multivariable model including an  
6  
7 303 interaction variable, the intervention effect was comparable among those admitted directly to the  
8  
9 304 ICUs (aHR 0.74, 95% CI 0.51 to 1.08) and those admitted directly to the general medical wards  
10  
11 305 (aHR 0.69, 95% CI 0.57 to 0.86).  
12  
13  
14

15 306  
16  
17 307 We estimated NNT by assuming that the adjusted HR 0.70 (95% CI 0.57 to 0.66) was the size of  
18  
19 308 effect caused by the SFT programme. The NNT to prevent one case of death involving community-  
20  
21 309 acquired sepsis was 8.1 (95% CI 5.0 to 19.8).  
22  
23

24 310

### 25 26 311 **Secondary outcomes**

27  
28 312 Using multivariable logistic regression models, we found that patients in the SFT group were more  
29  
30 313 likely to receive most sepsis management interventions than patients in the control group adjusting  
31  
32 314 for baseline characteristics and severity of sepsis (Table 3). Those included antibiotics, blood  
33  
34 315 cultures, adrenergic agents, and placement of a urinary catheter within the first day of  
35  
36 316 hospitalization. However, sepsis patients in the SFT group were less likely to receive mechanical  
37  
38 317 ventilation compared with those in the control group (adjusted odds ratio [aOR] 0.32; 95% CI 0.25  
39  
40 318 to 0.40) adjusted for baseline characteristics, severity of sepsis and direct admission to the ICUs.  
41  
42 319 We found that direct admission to the ICUs (aOR 6.93, 95% CI 5.01 to 9.58) and transfer from  
43  
44 320 other hospitals (aOR 4.49, 95% CI 3.08 to 6.55) were strongly associated with receiving  
45  
46 321 mechanical ventilation.  
47  
48  
49  
50

51 322  
52  
53  
54  
55  
56  
57  
58  
59  
60

323 **Table 3| Clinical management within the first day of hospital**

| Clinical management     | SFT group<br>(n=899) | Control<br>group<br>(n=2817) | Adjusted odds ratio<br>(95% CI) | P value |
|-------------------------|----------------------|------------------------------|---------------------------------|---------|
| Antibiotic              | 870 (97%)            | 2356 (84%)                   | 14.12 (6.11 to 32.68)           | <0.001  |
| Blood culture           | 826 (92%)            | 2310 (82%)                   | 1.79 (1.32 to 2.42)             | <0.001  |
| Urinary catheterization | 858 (95%)            | 1599 (57%)                   | 10.79 (7.51 to 15.50)           | <0.001  |
| Acute dialysis          | 10 (1%)              | 23 (0.8%)                    | 1.90 (0.63 to 5.75)             | 0.26    |
| Adrenergic agent        | 706 (79%)            | 900 (32%)                    | 10.70 (8.42 to 13.60)           | <0.001  |
| Mechanical ventilation  | 305 (34%)            | 845 (30%)                    | 0.32 (0.25 to 0.40)             | <0.001  |

324

325 **Sensitivity Analyses**

326 We performed a sensitivity analysis by excluding the 1,599 patients enrolled in the observational  
 327 study prior to the implementation of SFT programme. Similar differences in baseline  
 328 characteristics were observed when comparing 899 patients in the SFT group to the 1,218 patients  
 329 in the control group enrolled after the implementation of the SFT programme (Supplementary  
 330 Table 3). A lower risk of mortality in the SFT group compared to the control group was also  
 331 observed (aHR 0.65, 95% CI 0.53 to 0.81,  $p < 0.001$ ; Supplementary Table 4). There was no  
 332 interaction between the intervention and direct admission to the ICUs ( $p = 0.71$ ).

333

334 We also performed another sensitivity analysis by replacing direct admission to the ICUs with  
 335 admission to the ICUs within the first hospital day. Of 3,716 patients, 627 (17%) were admitted to  
 336 the ICUs within the first day of admission. A lower risk of mortality in the SFT group compared  
 337 to the control group was also observed (aHR 0.67, 95% CI 0.53 to 0.86,  $p < 0.001$ ). There was also  
 338 no interaction between the intervention and admission to the ICUs within the first day of admission  
 339 ( $p = 0.56$ ).

340

341 **DISCUSSION**

342 In this natural experiment evaluating 3,716 patients with community acquired sepsis, enrollment  
343 into a programme to identify and initiate sepsis care implemented at the study hospital (SFT  
344 programme) was associated with 30% lower risk of mortality (aHR 0.70, 95% CI 0.57 to 0.86). In  
345 recent years, there has been an increasing need to understand benefit and cost effectiveness of  
346 implementation of sepsis care interventions in LMICs because of concerns that international sepsis  
347 guidelines<sup>11</sup> may not be extrapolated to patients with tropical infectious diseases<sup>7-9</sup> and to resource-  
348 limited settings with poor ICU capacity.<sup>10</sup> In this trial we show effectiveness of implementation of  
349 sepsis protocol modified based on resource availability in a tropical country, where causes of  
350 community-acquired sepsis include malaria and tropical viral diseases.<sup>17 20 21</sup> Access to the ICU  
351 increased after the implementation of the SFT programme, but the majority of sepsis patients were  
352 still managed on the general wards, including those with respiratory failure or shock. Nonetheless,  
353 our study shows that enhancing sepsis care in the emergency department and general medical  
354 wards, as well as improving access to ICUs can reduce sepsis mortality in a LMIC.

355

356 The negative association between the intervention and received mechanical ventilation could be a  
357 sign of improved sepsis care. Patients in the SFT group are monitored closely either in or outside  
358 the ICUs, and the attending physicians aim to obviate the need for airway intubation when  
359 possible.<sup>7</sup> Attending physicians may tend to provide mechanical ventilation to patients in the  
360 control group based on broad indications such as (1) airway protection, (2) hypercapnic respiratory  
361 failure, (3) hypoxemic respiratory failure or (4) circulatory failure<sup>22 23</sup> because they may not be

1  
2  
3 362 able to monitor patients' breathing and oxygen saturation as often as those enrolled in the SFT  
4  
5 363 programme.  
6

7  
8 364  
9  
10 365 Patients in the SFT group had more organ dysfunction than those in the control group because the  
11  
12 366 SFT programme enrolled patients on admission and, therefore, could not use laboratory test results  
13  
14 367 from blood samples drawn on admission. However, the control group were defined as having  
15  
16 368 sepsis based on clinical findings and all laboratory test results within 24 hours of admission (per  
17  
18 369 protocol of Ubon-sepsis cohort study<sup>17 18</sup>). Therefore, the control group could use laboratory test  
19  
20 370 results (i.e. liver function tests, creatinine level, international normalised ratio and activated partial  
21  
22 371 thromplastin time) from blood specimens drawn on admission. Therefore, the SFT programme  
23  
24 372 were more likely to enroll patients with obvious signs of sepsis and septic shock; such as acute  
25  
26 373 respiratory failure and hypotension, while Ubon-sepsis cohort could include sepsis patients with  
27  
28 374 relatively lower modified SOFA score.  
29  
30  
31  
32

33 375

### 35 376 **Comparison with other studies**

36  
37 377 Our study is not the first to evaluate effectiveness of sepsis intervention in LMICs. Early  
38  
39 378 recognition and protocol directed intervention improves outcomes of sepsis in adults<sup>24</sup> and severe  
40  
41 379 infection in children<sup>25</sup> in LMICs. The optimal method of fluid resuscitation in sepsis in tropical  
42  
43 380 LMICs has not been determined.<sup>8 24 26 27</sup> Our resuscitation protocol is a simple guideline, and the  
44  
45 381 SFT recommend doctors to be careful and adjust fluid resuscitation based on preliminary  
46  
47 382 diagnoses, underlying diseases and rapid diagnostic test results (i.e. if sepsis is caused by malaria  
48  
49 383 or dengue infection). The implementation of the SFT programme in our study hospital and in  
50  
51  
52  
53  
54  
55  
56  
57  
58  
59  
60



1  
2  
3 384 Thailand is consistent with the recommendation of “SCAN-TEACH-TREAT” programme  
4  
5 385 developed by Sepsis in Resource-Limited Settings Workgroup of the Surviving Sepsis Campaign.<sup>7</sup>  
6  
7  
8 386 The SFT programme evaluated resources in the setting (SCAN component), focused on  
9  
10 387 educational interventions on early recognition and management of sepsis among medical personnel  
11  
12 388 including physicians, nurses and students (TEACH component) and implemented pragmatic and  
13  
14 389 simple bundles into practice (TREAT component). In addition, the SFT programme has the strong  
15  
16  
17 390 support and endorsement of local health and governmental leaders.<sup>12</sup>  
18  
19  
20

391

### 392 **Strength and limitations of the study**

23  
24 393 This study features three strengths. First, it took advantage of a robust prospective observational  
25  
26 394 study design that strengthened causal inference by providing pre-intervention information, having  
27  
28 395 an appropriate control group from both pre and post-intervention periods, and controlling  
29  
30 396 important confounding factors (i.e. the modified SOFA score) which were measured  
31  
32 397 systematically throughout the study period. Second, this study incorporated several predictors of  
33  
34 398 interest (measured sepsis management interventions and admission to the ICUs). This allows us to  
35  
36 399 identify that most measured sepsis interventions increased and that admission to the ICUs were  
37  
38 400 not associated with the interventional effect. Third, the focus on sepsis at a public tertiary-care  
39  
40 401 hospital in Thailand helped us to estimate the interventional effect of an implementation of sepsis  
41  
42 402 protocol in a tropical resource-limited setting.  
43  
44  
45  
46

403

47  
48  
49 404 Our study had several limitations. First, our findings may not be able to generalize to all hospitals  
50  
51 405 and all sepsis protocols in LMICs. It is recommended that each resource-limited setting should set  
52  
53  
54  
55  
56  
57

1  
2  
3 406 up their own SCAN-TEACH-TREAT programme, and closely monitor and evaluate the  
4  
5 407 effectiveness of an intervention implemented.<sup>7</sup> Second, a modified SOFA score was used because  
6  
7 408 the dosage of dobutamine, dopamine, epinephrine and norepinephrine were not recorded and  
8  
9 409 arterial blood gases were rarely performed. The modified SOFA score (maximum 23) may be  
10  
11 410 lower than the SOFA score (maximum 24). Nonetheless, the modified SOFA score is strongly  
12  
13 411 associated with mortality in sepsis.<sup>17 18</sup> Third, the cost of implementing the SFT programme was  
14  
15 412 not formally estimated.  
16  
17  
18  
19 413

## 21 414 **Conclusions and future implications**

23  
24 415 Our study successfully measured effectiveness of a sepsis programme implemented in a LMIC.  
25  
26 416 Measuring effectiveness of a sepsis programme is a complex issue, and we utilized a natural  
27  
28 417 experiment and carefully controlled for severity of sepsis and temporal trends in our analyses. Care  
29  
30 418 in sepsis patients improved after the implementation of the programme. While the natural  
31  
32 419 experiment adds to our knowledge of effectiveness of a sepsis programme, additional research is  
33  
34 420 needed to better understand cost of the intervention, long-term benefits and impact of the  
35  
36 421 programme on a national scale. National policies aimed at saving lives from sepsis in LMICs  
37  
38 422 should not hesitate to analyze their resources and situations, and then develop, implement and  
39  
40 423 monitor their programmes.  
41  
42  
43  
44  
45 424

1  
2  
3 425 **Acknowledgement:**  
4

5 426 We thank all patients, their relatives, and staff of the Sunpasitthiprasong hospital who participated  
6  
7 427 in the study. We thank Mayura Malasit, Praweennuch Watanachaiprasert, Chayamon  
8  
9 428 Krainoonsing, Passaraporn Kesaphun, Nannicha Jirapornuwat, Gumphol Wongsuvan, Areeya  
10  
11 429 Faosap, Yaowaret Dokket, Sukhumal Pewlaorng, Jintana Suwannapruek, Prapass Wannapinij and  
12  
13 430 Diane Tomita for their clinical, laboratory and administrative support.  
14  
15  
16  
17 431

18  
19 432 **Contributors:**  
20

21 433 NPJD, TEW, and DL obtained grant funding. SB, VH, PT, TEW, and DL contributed to study  
22  
23 434 conception development and study design. SB, VH, PT, TEW and DL contributed to study  
24  
25 435 conduct, data collection, and study administration. VH and DL performed the statistical analysis  
26  
27 436 and interpreted the data and had full access to all of the data in the study. Both authors can take  
28  
29 437 responsibility for the integrity of the data and the accuracy of the data analysis. DL is a guarantor.  
30  
31 438 SB, VH, PT, TEW, and DL wrote the first draft of a manuscript. All authors contributed to results  
32  
33 439 interpretation, and critically revised and approved the final submitted manuscript. The  
34  
35 440 corresponding author attests that all listed authors meet authorship criteria and that no others  
36  
37 441 meeting the criteria have been omitted.  
38  
39  
40  
41  
42 442

43  
44 443 **Funding:**  
45

46 444 The study was funded by the Wellcome Trust (090219/Z/09/Z) and National Heart, Lung and  
47  
48 445 Blood Institute, National Institutes of Health (R01HL113382). DL is supported by an intermediate  
49  
50 446 fellowship from the Wellcome Trust (101103/Z/13/Z). The funders had no role in the design and  
51  
52  
53  
54  
55  
56  
57  
58  
59  
60

1  
2  
3 447 conduct of the study, all study procedures, data collection, data analyses, data interpretation,  
4  
5 448 writing of the report, and the decision to submit the article for publication.  
6  
7

8 449

9  
10 450 **Competing interests:**

11  
12 451 The authors declare that they have no completing interests.  
13  
14

15 452

16  
17 453 **Ethics approvals:**

18  
19 454 The study was conducted the study in full compliance with the principles of good clinical practice  
20  
21 455 (GCP), and the ethical principles of the Declaration of Helsinki. The study protocol and related  
22  
23 456 documents were approved by Sunpasitthiprasong Hospital Ethics Committee (039/2556), the  
24  
25 457 Ethics Committee of the Faculty of Tropical Medicine, Mahidol University (MUTM2012-024-  
26  
27 458 01), the University of Washington Institutional Review Board (42988) and the Oxford Tropical  
28  
29 459 Research Ethics Committee at the University of Oxford (OXTREC172-12). Signed or  
30  
31 460 fingerprinted informed consent was obtained from the participants or their representatives before  
32  
33 461 enrollment.  
34  
35  
36  
37

38 462

39  
40 463 **Data sharing:**

41  
42 464 The final database with the data dictionary are publicly available online  
43  
44 465 <https://doi.org/10.6084/m9.figshare.12102627>.  
45  
46

47 466 The lead authors (SB, VH and DL) affirm that the manuscript is an honest, accurate, and  
48  
49 467 transparent account of the study being reported; that no important aspects of the study have been  
50  
51 468 omitted; and that any discrepancies from the study as planned have been explained. This is an  
52  
53  
54  
55  
56  
57

1  
2  
3 469 Open Access article distributed in accordance with the terms of the Creative Commons Attribution  
4  
5 470 (CC BY 4.0) license, which permits unrestricted reuse, distribution, and reproduction in any  
6  
7  
8 471 medium, provided the original work is properly cited. See:  
9  
10 472 <http://creativecommons.org/licenses/by/4.0/>

11  
12 473

#### 13 14 474 **Patient and Public Involvement**

15  
16  
17 475 No patients were involved in setting the research question or the outcome measures, and  
18  
19 476 interpretation or writing up of results. The results of this study will be disseminated to physicians  
20  
21 477 at the study hospital, health care providers, policy makers, and academic communities through  
22  
23 478 various mediums, including printed report, internal hospital meetings, academic conferences, and  
24  
25 479 institutional networks. The results from this study will be used to inform the current Sepsis Fast  
26  
27 480 Track programme at Sunpasitthiprasong hospital and the community hospitals which are located  
28  
29 481 in jurisdiction of the study hospital catchment areas in the Northeast Thailand. The study results  
30  
31 482 will not be disseminated to patients or general population, because study results are in medical  
32  
33 483 context.  
34  
35  
36  
37  
38  
39  
40  
41  
42  
43  
44  
45  
46  
47  
48  
49  
50  
51  
52  
53  
54  
55  
56  
57  
58  
59  
60

1  
2  
3  
4  
5  
6  
7 4848 485 **References**

- 10 486 1 Singer M, Deutschman CS, Seymour CW, et al. The Third International Consensus  
11  
12 487 Definitions for Sepsis and Septic Shock (Sepsis-3). *JAMA* 2016;315(8):801-10.  
13  
14 488 doi: 10.1001/jama.2016.0287
- 17 489 2 Rhodes A, Evans LE, Alhazzani W, et al. Surviving Sepsis Campaign: International  
18  
19 490 Guidelines for Management of Sepsis and Septic Shock 2016. *Crit Care Med*  
20  
21 491 2017;45(3):486-552. doi: 10.1097/ccm.0000000000002255
- 24 492 3 WHO. WHO Sepsis Technical Expert Meeting - Meeting report Geneva:  
25  
26 493 World Health Organization; 2018  
27  
28 494 [Available from: [https://www.who.int/service\\_delivery/safety/areas/sepsis\\_meeting-report-](https://www.who.int/service_delivery/safety/areas/sepsis_meeting-report-2018.pdf)  
29 495 [2018.pdf](https://www.who.int/service_delivery/safety/areas/sepsis_meeting-report-2018.pdf) accessed 25 November 2019 2019].
- 33 496 4 Vincent J-L. The Clinical Challenge of Sepsis Identification and Monitoring. *PLoS Med*  
34  
35 497 2016;13(5):e1002022. doi: 10.1371/journal.pmed.1002022
- 38 498 5 Rudd KE, Johnson SC, Agesa KM, et al. Global, regional, and national sepsis incidence  
39  
40 499 and mortality, 1990&#x2013;2017: analysis for the Global Burden of Disease Study. *The*  
41  
42 500 *Lancet* 2020;395(10219):200-11.  
43  
44 501 doi: 10.1016/S0140-6736(19)32989-7
- 47 502 6 Reinhart K, Daniels R, Kissoon N, et al. Recognizing Sepsis as a Global Health Priority  
48  
49 503 — A WHO Resolution. *N Engl J Med* 2017;377(5):414-17.  
50  
51 504 doi: 10.1056/NEJMp1707170

- 1  
2  
3  
4  
5  
6  
7 505 7 Kwizera A, Baelani I, Mer M, et al. The long sepsis journey in low- and middle-income  
8  
9 506 countries begins with a first step...but on which road? *Crit Care* 2018;22(1):64.  
10  
11 507 doi: 10.1186/s13054-018-1987-z  
12  
13 508 8 McGloughlin S, Richards GA, Nor MBM, et al. Sepsis in tropical regions: Report from  
14  
15 509 the task force on tropical diseases by the World Federation of Societies of Intensive and  
16  
17 510 Critical Care Medicine. *J Crit Care* 2018;46:115-18.  
18  
19  
20 511 doi: 10.1016/j.jcrc.2017.12.018  
21  
22 512 9 Becker JU, Theodosis C, Jacob ST, et al. Surviving sepsis in low-income and middle-  
23  
24 513 income countries: new directions for care and research. *Lancet Infect Dis* 2009;9(9):577-  
25  
26 514 82. doi: 10.1016/S1473-3099(09)70135-5  
27  
28  
29 515 10 Schultz MJ, Dunser MW, Dondorp AM, et al. Current challenges in the management of  
30  
31 516 sepsis in ICUs in resource-poor settings and suggestions for the future.  
32  
33  
34 517 *Intensive Care Med* 2017;43(5):612-24. doi: 10.1007/s00134-017-4750-z  
35  
36 518 11 Dellinger RP, Levy MM, Rhodes A, et al. Surviving Sepsis Campaign: international  
37  
38 519 guidelines for management of severe sepsis and septic shock, 2012.  
39  
40  
41 520 *Intensive Care Med* 2013;39(2):165-228. doi: 10.1007/s00134-012-2769-8  
42  
43 521 12 Office of permanent secretatry, Ministry of Public Health, Thailand. The Development of  
44  
45 522 Health Service Plan and Indicators of Health Outcomes 2018:8.  
46  
47  
48 523 13 Ruangchan S, Chusri S, Saengsanga P, et al. Clinical Outcomes of Community-Acquired  
49  
50 524 Severe Sepsis after Implementation of a Simple Severe Sepsis Fast Track.  
51  
52 525 *J Med Assoc Thai* 2016;99(8):877-85.  
53  
54  
55  
56  
57  
58  
59  
60

- 1  
2  
3  
4  
5  
6 526 14 Ittisanyakorn M, Ruchichanantakul S, Vanichkulbodee A, et al. Prevalence and factors  
7  
8 associated with one-year mortality of infectious diseases among elderly emergency  
9 527  
10 department patients in a middle-income country. *BMC Infect Dis* 2019;19(1):662.  
11 528  
12 doi: 10.1186/s12879-019-4301-z  
13 529  
14  
15 530 15 Clarke GM, Conti S, Wolters AT, et al. Evaluating the impact of healthcare interventions  
16  
17 using routine data. *BMJ* 2019;365:l2239. doi: 10.1136/bmj.l2239  
18 531  
19  
20 532 16 Craig P, Cooper C, Gunnell D, et al. Using natural experiments to evaluate population  
21  
22 health interventions: new Medical Research Council guidance.  
23 533  
24 *J Epidemiol Community Health* 2012;66(12):1182-6. doi: 10.1136/jech-2011-200375  
25 534  
26  
27 535 17 Hantrakun V, Somayaji R, Teparrukkul P, et al. Clinical epidemiology and outcomes of  
28  
29 community acquired infection and sepsis among hospitalized patients in a resource limited  
30 536  
31 setting in Northeast Thailand: A prospective observational study (Ubon-sepsis). *PLoS One*  
32 537  
33 2018;13(9):e0204509. doi: 10.1371/journal.pone.0204509  
34 538  
35  
36 539 18 Rudd KE, Hantrakun V, Somayaji R, et al. Early management of sepsis in medical patients  
37  
38 in rural Thailand: a single-center prospective observational study.  
39 540  
40 *J Intensive Care* 2019;7:55. doi: 10.1186/s40560-019-0407-z  
41 541  
42  
43 542 19 Altman DG, Andersen PK. Calculating the number needed to treat for trials where the  
44  
45 outcome is time to an event. *BMJ* 1999;319(7223):1492.  
46 543  
47  
48 544 doi: 10.1136/bmj.319.7223.1492  
49  
50 545 20 Teparrukkul P, Hantrakun V, Imwong M, et al. Utility of qSOFA and modified SOFA in  
51  
52 severe malaria presenting as sepsis. *PLoS One* 2019;14(10):e0223457.  
53 546  
54  
55 547 doi: 10.1371/journal.pone.0223457  
56  
57



- 1  
2  
3  
4  
5  
6 548 21 Teparrukkul P, Hantrakun V, Day NPJ, et al. Management and outcomes of severe  
7  
8  
9 549 dengue patients presenting with sepsis in a tropical country. *PLoS One*  
10  
11 550 2017;12(4):e0176233. doi: 10.1371/journal.pone.0176233  
12  
13 551 22 Pierson DJ. Indications for mechanical ventilation in adults with acute respiratory failure.  
14  
15 552 *Respir Care* 2002;47(3):249-62; discussion 62-5.  
16  
17  
18 553 23 Pham T, Brochard LJ, Slutsky AS. Mechanical Ventilation: State of the Art. *Mayo Clin*  
19  
20 554 *Proc* 2017;92(9):1382-400. doi: 10.1016/j.mayocp.2017.05.004  
21  
22  
23 555 24 Jacob ST, Banura P, Baeten JM, et al. The impact of early monitored management on  
24  
25 556 survival in hospitalized adult Ugandan patients with severe sepsis:  
26  
27 557 a prospective intervention study\*. *Crit Care Med* 2012;40(7):2050-8.  
28  
29 558 doi: 10.1097/CCM.0b013e31824e65d7  
30  
31  
32 559 25 Sazawal S, Black RE, Pneumonia Case Management Trials G. Effect of pneumonia case  
33  
34 560 management on mortality in neonates, infants, and preschool children:  
35  
36 561 a meta-analysis of community-based trials. *Lancet Infect Dis* 2003;3(9):547-56.  
37  
38 562 doi: 10.1016/s1473-3099(03)00737-0  
39  
40  
41 563 26 Maitland K, Kiguli S, Opoka RO, et al. Mortality after fluid bolus in African children  
42  
43 564 with severe infection. *N Engl J Med* 2011;364(26):2483-95.  
44  
45 565 doi: 10.1056/NEJMoa1101549  
46  
47  
48 566 27 Andrews B, Semler MW, Muchemwa L, et al. Effect of an Early Resuscitation Protocol  
49  
50 567 on In-hospital Mortality Among Adults With Sepsis and Hypotension: A Randomized  
51  
52 568 Clinical Trial. *JAMA* 2017;318(13):1233-40.  
53  
54  
55 569 doi: 10.1001/jama.2017.10913  
56  
57

1  
2  
3  
4  
5  
6  
7  
8  
9  
10  
11  
12  
13  
14  
15  
16  
17  
18  
19  
20  
21  
22  
23  
24  
25  
26  
27  
28  
29  
30  
31  
32  
33  
34  
35  
36  
37  
38  
39  
40  
41  
42  
43  
44  
45  
46  
47  
48  
49  
50  
51  
52  
53  
54  
55  
56  
57  
58  
59  
60

570

571

For peer review only

1  
2  
3  
4  
5  
6 **572 Figure legends**

7  
8  
9 **573 Figure 1| Flow of participants through study**

10  
11 **574 Footnote of figure 1:** This natural experiment used the data of an observational study on sepsis  
12  
13 patients (Ubon-sepsis) from March 2013 to January 2017 to evaluate the effectiveness of a Sepsis  
14 **575**  
15  
16 **576** Fast Track (SFT) programme implemented at the study hospital in January 2015  
17  
18  
19  
20  
21  
22  
23  
24  
25  
26  
27  
28  
29  
30  
31  
32  
33  
34  
35  
36  
37  
38  
39  
40  
41  
42  
43  
44  
45  
46  
47  
48  
49  
50  
51  
52  
53  
54  
55  
56  
57

1  
2  
3  
4  
5  
6  
7  
8  
9  
10  
11  
12  
13  
14  
15  
16  
17  
18  
19  
20  
21  
22  
23  
24  
25  
26  
27  
28  
29  
30  
31  
32  
33  
34  
35  
36  
37  
38  
39  
40  
41  
42  
43  
44  
45  
46  
47  
48  
49  
50  
51  
52  
53  
54  
55  
56  
57  
58  
59  
60

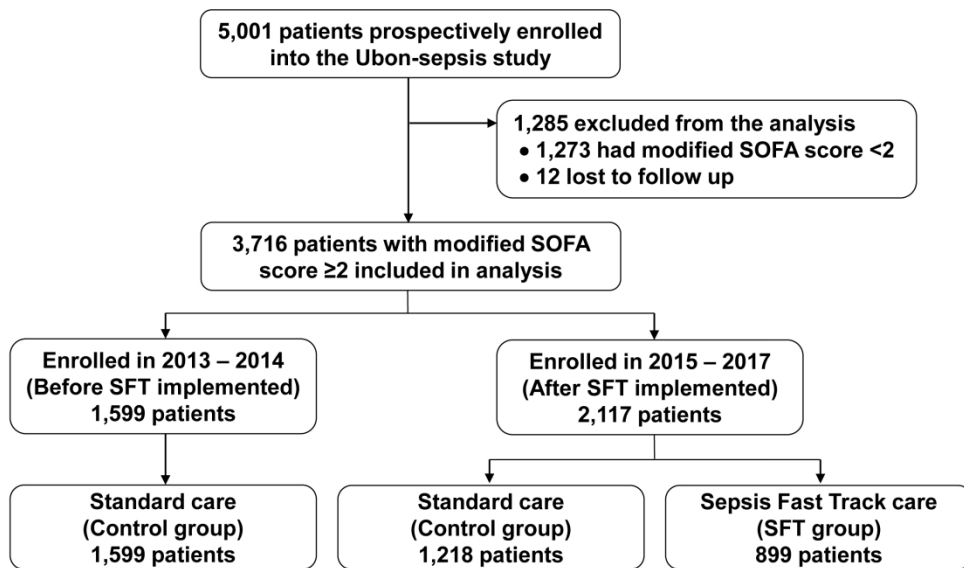

1  
2  
3 **1 Effectiveness of a sepsis programme implemented in a resource-limited setting: a natural**  
4  
5 **2 experiment**  
6  
7

8  
9  
10  
11 4 Suchart Booraphun MD<sup>1</sup>, Viriya Hantrakun PhD<sup>2</sup>, Suwatthiya Siriboon MD<sup>1</sup>, Chaiyaporn Boonsri  
12  
13 5 MD<sup>1</sup>, Pulyamon Poomthong MD<sup>1</sup>, Bung-Orn Singkaew BNS<sup>1</sup>, Oratai Wasombat BNS<sup>1</sup>, Parinya  
14  
15 6 Chamna MD, PhD<sup>1</sup>, Ratapum Champunot MD<sup>3</sup>, Kristina Rudd MD, MPH<sup>4, 5</sup>, Nicholas P.J. Day<sup>2,6</sup>  
16  
17 7 MD<sup>2</sup>, PhD, Arjen Dondrop MD<sup>2,6</sup>, PhD, Prapit Teparrukkul MD<sup>1</sup>, T. Eoin West MD, MPH<sup>5</sup>, Direk  
18  
19 8 Limmathurotsakul MD, PhD<sup>2,6,7</sup>  
20  
21

22  
23  
24 10 Short Title: Sepsis Fast Track Thailand  
25  
26

27  
28  
29 12 <sup>1</sup>Sunpasitthiprasong Hospital, Ubon Ratchathani, Thailand  
30

31 13 <sup>2</sup>Mahidol Oxford Tropical Medicine Research Unit, Faculty of Tropical Medicine, Mahidol  
32  
33 14 University, Bangkok, Thailand  
34  
35

36 15 <sup>3</sup>Department of Internal Medicine, Buddhachinaraj Phitsanulok Hospital, Phitsanulok, Thailand  
37

38 16 <sup>4</sup>Department of Critical Care Medicine, University of Pittsburgh, Pittsburgh, Pennsylvania, USA  
39

40 17 <sup>5</sup>Division of Pulmonary, Critical Care, and Sleep Medicine, University of Washington, Seattle,  
41  
42 18 United States  
43  
44

45 19 <sup>6</sup>Centre for Tropical Medicine and Global Health, Nuffield Department of Medicine, University  
46  
47 20 of Oxford, Churchill Hospital, Oxford, United Kingdom  
48  
49

50 21 <sup>7</sup>Department of Tropical Hygiene, Faculty of Tropical Medicine, Mahidol University, Bangkok,  
51  
52 22 Thailand  
53

54  
55 23  
56  
57  
58  
59  
60

24 **Supplementary Table 1 | Criteria used to systematically enroll patents into Sepsis Fast Track**  
25 **(SFT) upon admission**

26 **1. Present with 2 or more of below Signs of systemic inflammatory response syndrome**  
27 **(SIRS)**

- 28 • Body temperature  $> 38.3\text{ }^{\circ}\text{C}$  or  $< 36.0\text{ }^{\circ}\text{C}$
- 29 • Heart rate  $> 90$  bpm
- 30 • Respiratory rate  $> 20$  pm or  $\text{PaCO}_2 < 32$  mmHg
- 31 • WBC  $> 12,000/\mu\text{L}$  or  $< 4,000/\mu\text{L}$  or Band forms  $> 10\%$

32 **2. Suspected sources of infection**

- 33 • Pneumonia
- 34 • Urinary track infection
- 35 • Intra-abdominal infection
- 36 • Skin and soft tissue infection
- 37 • CNS infection
- 38 • Others infections or unspecified source of infection

39 **3. Diagnostic criteria for severe sepsis:** patient met criteria in no 1 and 2 and has at least  
40 one of the following criteria

- 41 • Mottled skin
- 42 • Capillary refilling time  $\geq 3$  seconds
- 43 • Urine output  $< 0.5$  ml/kg/hour
- 44 • Abrupt change in mental status
- 45 • Acute respiratory failure
- 46 • Platelet count  $< 100,000/\mu\text{L}$
- 47 • Disseminated intravascular coagulation
- 48 • Lactate  $> 2$  mmol/L
- 49 • SBP  $< 90$  mmHg or MAP  $< 65$  mmHg

50 **4. Diagnostic criteria for septic shock:** patient who are severe sepsis and has at least 1 of  
51 the following criteria

- 52 • SBP  $< 90$  mmHg or MAP  $< 65$  mmHg after crystalliod administration  $\geq 40$ -60  
53 ml/kg of body weight OR after colloid administration  $\geq 20$ -30 ml/kg of body weight
- 54 • Require administration of dopamine  $> 5\mu\text{g}/\text{kg}$  of BW/min or norepinephrine /  
55 epinephrine  $> 0.02\ \mu\text{g}/\text{kg}$  of BW/min to maintain MAP to be  $> 65$  mmHg

1  
2  
3 **57 Supplementary Table 2 | Systemic manifestation of infection criteria used for enrollment in**  
4  
5 **58 Ubon-Sepsis Cohort**

6  
7 **59 General parameters**

- 8 60 1. Fever or hypothermia (Core body temperature defined as  $> 38.3$  °C or  $< 36.0$  °C)  
9  
10 61 2. Tachycardia (heart rate  $> 90$  beats per minute)  
11  
12 62 3. Tachypnea (respiratory rate  $> 20$  per minute)  
13  
14 63 4. Altered mental status with Glasgow Coma Score (GCS)  $< 15$  or  $< 10$  if intubated  
15  
16 64 5. Hyperglycemia (plasma glucose  $> 140$  mg/dL) in the absence of diabetes

17 **65 Inflammatory parameters**

- 18 66 6. Leukocytosis (white blood cell count  $> 12,000/\mu\text{L}$ ), leukopenia (white blood cell count  $<$   
19  $4000/\mu\text{L}$ ) or immature forms  $> 10\%$   
20  
21 67 7. Plasma C-reactive protein  $> 2$  SD above the normal value  
22  
23 68 8. Plasma procalcitonin  $> 2$  SD above the normal value  
24

25 **70 Hemodynamic parameters**

- 26 71 9. Arterial hypotension (systolic blood pressure (SBP)  $< 90$  mmHg, mean arterial pressure  
27 (MAP)  $< 70$  mmHg, or SBP decrease  $> 40$  mmHg)  
28  
29

30 **73 Organ dysfunction parameters**

- 31 74 10. Low oxygen saturation determined by pulse oximetry ( $\text{SpO}_2 < 95\%$ ) determined by pulse  
32 oximetry  
33  
34 75 11. Arterial hypoxemia ( $\text{PaO}_2 / \text{FIO}_2 < 300$ )  
35  
36 76 12. Acute oliguria (urine output  $< 0.5$  mL/kg/hr or  $45$  mmol/L for 2 hours)  
37  
38 77 13. Creatinine increase  $> 0.5$  mg/dL  
39  
40 78 14. Coagulation abnormalities (international normalised ratio  $> 1.5$  or activated partial  
41 thromboplastin time  $> 60$  seconds)  
42  
43 79 15. Thrombocytopenia (Platelet count  $< 100,000$  cells/ $\mu\text{L}$ )  
44  
45 80 16. Ileus (absent bowel sounds)  
46  
47 81 17. Hyperbilirubinaemia (plasma total bilirubin  $> 4$  mg/dL)  
48

49 **84 Tissue perfusion parameters**

- 50 85 18. Hyperlactatemia ( $> 1$  mmol/L)  
51  
52 86 19. Decreased capillary refill or mottling  
53  
54 87 20. Significant edema or positive fluid balance  
55  
56  
57  
58  
59  
60

89 **Supplementary Table 3 | Baseline characteristics of sepsis patients included in the Sepsis Fast**  
 90 **Track (SFT) programme or standard of care (control) after the implementation of SFT**  
 91 **programme. Values are number (percentages) unless stated otherwise**

| Characteristics                                 | SFT group <sup>2</sup><br>(n=899) | Control<br>group <sup>3</sup><br>(n=1218) | P value |
|-------------------------------------------------|-----------------------------------|-------------------------------------------|---------|
| <b>Male gender</b>                              | 523 (58%)                         | 702 (58%)                                 | 0.82    |
| <b>Age (years) (median [IQR])</b>               | 63 (49-74)                        | 59 (41-73)                                | <0.001  |
| <b>Age group (years) (n [%])</b>                |                                   |                                           |         |
| 18-40                                           | 98 (11%)                          | 282 (23%)                                 | <0.001  |
| >40-60                                          | 277 (31%)                         | 342 (28%)                                 |         |
| >60-70                                          | 214 (24%)                         | 221 (18%)                                 |         |
| >70                                             | 310 (34%)                         | 373 (31%)                                 |         |
| <b>Comorbidities</b>                            | 484 (54%)                         | 639 (52%)                                 | 0.53    |
| Hypertension                                    | 239 (27%)                         | 332 (27%)                                 | 0.73    |
| Diabetes mellitus                               | 213 (24%)                         | 274 (23%)                                 | 0.52    |
| Chronic kidney disease                          | 129 (14%)                         | 195 (16%)                                 | 0.29    |
| Dyslipidemia                                    | 66 (7%)                           | 76 (6%)                                   | 0.32    |
| Heart disease                                   | 47 (5%)                           | 96 (8%)                                   | 0.02    |
| Lung disease                                    | 65 (7%)                           | 116 (10%)                                 | 0.06    |
| Liver disease                                   | 33 (4%)                           | 46 (4%)                                   | 0.90    |
| Cerebrovascular disease                         | 29 (3%)                           | 25 (2%)                                   | 0.09    |
| Malignancy                                      | 13 (1%)                           | 32 (3%)                                   | 0.06    |
| Human immunodeficiency virus (HIV)              | 6 (1%)                            | 9 (1%)                                    | 0.85    |
| <b>Organ dysfunction<sup>4</sup></b>            |                                   |                                           |         |
| Total modified SOFA score (median [IQR])        | 6 (4-8)                           | 4 (3-6)                                   | <0.001  |
| Renal dysfunction <sup>4</sup>                  | 705 (78%)                         | 728 (60%)                                 | <0.001  |
| Cardiovascular dysfunction <sup>4</sup>         | 800 (89%)                         | 437 (36%)                                 | <0.001  |
| Coagulation dysfunction <sup>4</sup>            | 391 (43%)                         | 612 (50%)                                 | 0.002   |
| Liver dysfunction <sup>4</sup>                  | 311 (35%)                         | 314 (26%)                                 | <0.001  |
| Respiratory dysfunction <sup>4</sup>            | 287 (32%)                         | 339 (28%)                                 | 0.04    |
| Central nervous system dysfunction <sup>4</sup> | 166 (18%)                         | 214 (18%)                                 | 0.61    |
| <b>Transferred from other hospitals</b>         | 874 (97%)                         | 1009 (83%)                                | <0.001  |
| <b>Duration of symptoms (median [IQR])</b>      | 2 (1-3)                           | 3 (1-5)                                   | <0.001  |
| ≤ 2 days                                        | 503 (56%)                         | 519 (43%)                                 | <0.001  |
| 3-7 days                                        | 361 (40%)                         | 624 (51%)                                 |         |
| > 7 days                                        | 35 (4%)                           | 75 (6%)                                   |         |



| <b>Characteristics</b>                                       | <b>SFT group<sup>2</sup><br/>(n=899)</b> | <b>Control<br/>group<sup>3</sup><br/>(n=1218)</b> | <b>P value</b> |
|--------------------------------------------------------------|------------------------------------------|---------------------------------------------------|----------------|
| <b>Presenting clinical syndromes<sup>5</sup><br/>(n [%])</b> |                                          |                                                   |                |
| Septic shock                                                 | 686 (76%)                                | 179 (15%)                                         | <0.001         |
| Acute febrile illness                                        | 205 (23%)                                | 469 (39%)                                         | <0.001         |
| Lower respiratory infection                                  | 221 (25%)                                | 431 (35%)                                         | <0.001         |
| Sepsis                                                       | 223 (25%)                                | 131 (11%)                                         | <0.001         |
| Others                                                       | 13 (1%)                                  | 163 (13%)                                         | <0.001         |
| Diarrheal illness                                            | 150 (17%)                                | 102 (8%)                                          | <0.001         |
| <b>Admitted directly to an ICU upon<br/>admission</b>        | 169 (19%)                                | 39 (3%)                                           | <0.001         |
| <b>Blood culture positive for pathogenic<br/>organisms</b>   | 176 (20%)                                | 164 (13%)                                         | <0.001         |
| <b>Year</b>                                                  |                                          |                                                   |                |
| 2015                                                         | 355 (39%)                                | 634 (52%)                                         | <0.001         |
| 2016                                                         | 532 (59%)                                | 568 (47%)                                         |                |
| 2017                                                         | 12 (1%)                                  | 16 (1%)                                           |                |

92

93 <sup>1</sup>Organ dysfunction is defined by modified SOFA  $\geq 2$ 94 <sup>2</sup>Sepsis patients who were identified and treated in Sepsis-FT system in 2015 – January 2018.95 <sup>3</sup>Sepsis patients whom were not in Sepsis-FT system; 1599/2871 patients were enrolled into the  
96 study during 2013-2014 before Sepsis-FT implemented in the hospital.97 <sup>4</sup>Organ dysfunction defined as modified SOFA score was  $\geq 1$  for each organ system [13].98 <sup>5</sup>Patients may have more than one presenting clinical syndrome.

99

100 **Supplementary Table 4 | Factors associated with 28-day mortality using multivariable Cox**  
 101 **proportional hazards model in 2,117 patients enrolled into the study after the**  
 102 **implementation of the Sepsis Fast Track (SFT) programme**

| Variables                                              | Died<br>(n=423) | Survived<br>(n=1694) | Adjusted hazard ratio<br>(95%CI) | P value |
|--------------------------------------------------------|-----------------|----------------------|----------------------------------|---------|
| <b>SFT group</b>                                       | 205(48%)        | 694(41%)             | 0.65 (0.53- 0.81)                | <0.001  |
| <b>Male gender</b>                                     | 251(59%)        | 974(57%)             | 0.91 (0.75- 1.12)                | 0.38    |
| <b>Age group (years) (n [%])</b>                       |                 |                      |                                  |         |
| • 18-40                                                | 30(7%)          | 350(21%)             | 1                                | <0.001  |
| • >40-60                                               | 125(30%)        | 494(29%)             | 2.05 (1.37- 3.06)                |         |
| • >60-70                                               | 83(20%)         | 352(21%)             | 1.93 (1.26- 2.97)                |         |
| • >70                                                  | 185(44%)        | 498(29%)             | 3.19 (2.14- 4.74)                |         |
| <b>Transferred from other hospital</b>                 | 403(95%)        | 1480(87%)            | 1.82 (1.15- 2.90)                | 0.01    |
| <b>Modified SOFA score (median, IQR)</b>               | 7 (5-10)        | 4 (3-6)              | 1.25 (1.21- 1.28)                | <0.001  |
| <b>Comorbidities</b>                                   |                 |                      |                                  |         |
| • Diabetes mellitus                                    | 120(28%)        | 367(22%)             | 1.06 (0.85- 1.33)                | 0.59    |
| • Chronic kidney disease                               | 83(20%)         | 241(14%)             | 1.21 (0.94- 1.56)                | 0.14    |
| • Liver disease                                        | 22(5%)          | 57(3%)               | 1.06 (0.68- 1.64)                | 0.81    |
| • Malignancy                                           | 19(4%)          | 26(2%)               | 3.10 (1.94- 4.96)                | <0.001  |
| <b>Blood culture positive for pathogenic organisms</b> | 115(27%)        | 225(13%)             | 1.80 (1.44- 2.24)                | <0.001  |
| <b>Year</b>                                            |                 |                      |                                  |         |
| • 2015                                                 | 203(48%)        | 786(46%)             | 1                                | 0.10    |
| • 2016                                                 | 220(52%)        | 908(54%)             | 0.85 (0.70- 1.03)                |         |
| <b>Direct admission to the ICU</b>                     | 85(20%)         | 123(7%)              | 1.71 (1.31- 2.23)                | <0.001  |

103

104

105 **Supplementary Figure 1 | Preprinted recommended doctor orders for sepsis fast track**  
 106 **programme used at the Emergency Department at Sunpasitthiprasong Hopsital from 1**  
 107 **January 2015**

**SAPPASITTIPRASONG HOSPITAL** ๖๖.6/3

**DOCTOR'S ORDER SHEET** (Rev. 2: พ.ศ. 48)

| FFM                                                                                                                                                                                                           | PROGRESS NOTE                                                           | Date<br>Time | ORDER FOR ONE DAY                                                                                                                                                                                                                                                                                                                                                                                                                                                                                                                         | Date<br>Time | CONTINUOUS ORDER                                                                                                                                                                                                                      | Date of<br>Sign |
|---------------------------------------------------------------------------------------------------------------------------------------------------------------------------------------------------------------|-------------------------------------------------------------------------|--------------|-------------------------------------------------------------------------------------------------------------------------------------------------------------------------------------------------------------------------------------------------------------------------------------------------------------------------------------------------------------------------------------------------------------------------------------------------------------------------------------------------------------------------------------------|--------------|---------------------------------------------------------------------------------------------------------------------------------------------------------------------------------------------------------------------------------------|-----------------|
| HN.....<br>HN.....<br>HN.....<br>HN.....<br>HN.....<br>HN.....<br>HN.....<br>HN.....<br>HN.....<br>HN.....<br>HN.....<br>HN.....<br>HN.....<br>HN.....<br>HN.....<br>HN.....<br>HN.....<br>HN.....<br>HN..... | ER NON TRAUMA                                                           |              | Dx. <input type="checkbox"/> Sepsis <input type="checkbox"/> Severe Sepsis <input type="checkbox"/> Septic Shock<br>- Consult ICU Admit.....<br>- CxR<br>- EKG.....<br>- DTX. Stat.....<br>- Serum lactate .....<br>- CBC, PT, PTT, U/A<br>- BUN, Cr., E'lyte<br>- Liver Function Test,alb<br>- HC x II stat at ER.....M.<br>- HC x II at รพ.....M.<br>- V/S q 1 hr. x II then as usual<br>- on O2 canular 3 LPM if O2 sat < 95 %<br>- Retained Foley's cath<br>- NSS1,000 ml IV load.....in 10 min<br>then IV drip ..... ml/hr (30ml/kg) |              | - NPO<br>- Record V/S, N/S, I/O<br>Medication<br>ชัก Hx เพื่อยา <input type="checkbox"/> ไม่มี<br><input type="checkbox"/> มี.....<br>ตรวจสอบ Hx เพื่อยา ในHOMC<br><input type="checkbox"/> ไม่มี<br><input type="checkbox"/> มี..... |                 |
|                                                                                                                                                                                                               | Time onset                                                              |              |                                                                                                                                                                                                                                                                                                                                                                                                                                                                                                                                           |              |                                                                                                                                                                                                                                       |                 |
|                                                                                                                                                                                                               | Date                                                                    |              |                                                                                                                                                                                                                                                                                                                                                                                                                                                                                                                                           |              |                                                                                                                                                                                                                                       |                 |
|                                                                                                                                                                                                               | Time                                                                    |              |                                                                                                                                                                                                                                                                                                                                                                                                                                                                                                                                           |              |                                                                                                                                                                                                                                       |                 |
|                                                                                                                                                                                                               | Onset                                                                   |              |                                                                                                                                                                                                                                                                                                                                                                                                                                                                                                                                           |              |                                                                                                                                                                                                                                       |                 |
|                                                                                                                                                                                                               | Date                                                                    |              |                                                                                                                                                                                                                                                                                                                                                                                                                                                                                                                                           |              |                                                                                                                                                                                                                                       |                 |
|                                                                                                                                                                                                               | Time                                                                    |              |                                                                                                                                                                                                                                                                                                                                                                                                                                                                                                                                           |              |                                                                                                                                                                                                                                       |                 |
|                                                                                                                                                                                                               | E V M                                                                   |              |                                                                                                                                                                                                                                                                                                                                                                                                                                                                                                                                           |              |                                                                                                                                                                                                                                       |                 |
|                                                                                                                                                                                                               | BP /                                                                    |              |                                                                                                                                                                                                                                                                                                                                                                                                                                                                                                                                           |              |                                                                                                                                                                                                                                       |                 |
|                                                                                                                                                                                                               | HR T C                                                                  |              |                                                                                                                                                                                                                                                                                                                                                                                                                                                                                                                                           |              |                                                                                                                                                                                                                                       |                 |
|                                                                                                                                                                                                               | Source of infection                                                     |              |                                                                                                                                                                                                                                                                                                                                                                                                                                                                                                                                           |              |                                                                                                                                                                                                                                       |                 |
|                                                                                                                                                                                                               | <input type="checkbox"/> Respiratory <input type="checkbox"/> GI        |              |                                                                                                                                                                                                                                                                                                                                                                                                                                                                                                                                           |              |                                                                                                                                                                                                                                       |                 |
|                                                                                                                                                                                                               | <input type="checkbox"/> Skin, soft tissue <input type="checkbox"/> CNS |              |                                                                                                                                                                                                                                                                                                                                                                                                                                                                                                                                           |              |                                                                                                                                                                                                                                       |                 |
|                                                                                                                                                                                                               | <input type="checkbox"/> Cardiovascular                                 |              |                                                                                                                                                                                                                                                                                                                                                                                                                                                                                                                                           |              |                                                                                                                                                                                                                                       |                 |
|                                                                                                                                                                                                               | <input type="checkbox"/> Others.....                                    |              |                                                                                                                                                                                                                                                                                                                                                                                                                                                                                                                                           |              |                                                                                                                                                                                                                                       |                 |
|                                                                                                                                                                                                               | Systemic infection                                                      |              |                                                                                                                                                                                                                                                                                                                                                                                                                                                                                                                                           |              |                                                                                                                                                                                                                                       |                 |
|                                                                                                                                                                                                               | <input type="checkbox"/> Leptospirosis <input type="checkbox"/> Malaria |              |                                                                                                                                                                                                                                                                                                                                                                                                                                                                                                                                           |              |                                                                                                                                                                                                                                       |                 |
|                                                                                                                                                                                                               | <input type="checkbox"/> Rickettsia <input type="checkbox"/> Denque     |              |                                                                                                                                                                                                                                                                                                                                                                                                                                                                                                                                           |              |                                                                                                                                                                                                                                       |                 |
|                                                                                                                                                                                                               | พียง IV bolus.....ml                                                    |              |                                                                                                                                                                                                                                                                                                                                                                                                                                                                                                                                           |              |                                                                                                                                                                                                                                       |                 |
|                                                                                                                                                                                                               | BP / HR                                                                 |              |                                                                                                                                                                                                                                                                                                                                                                                                                                                                                                                                           |              |                                                                                                                                                                                                                                       |                 |
| IVF รพ.....ml                                                                                                                                                                                                 |                                                                         |              |                                                                                                                                                                                                                                                                                                                                                                                                                                                                                                                                           |              |                                                                                                                                                                                                                                       |                 |
| IVF at ER.....ml                                                                                                                                                                                              |                                                                         |              |                                                                                                                                                                                                                                                                                                                                                                                                                                                                                                                                           |              |                                                                                                                                                                                                                                       |                 |

108

109 **Supplementary Figure 2 | The Sepsis Fast Track sepsis resuscitation workflow used at the**  
 110 **Emergency Department at Sunpasitthiprasong Hopsital from 1 March 2016**

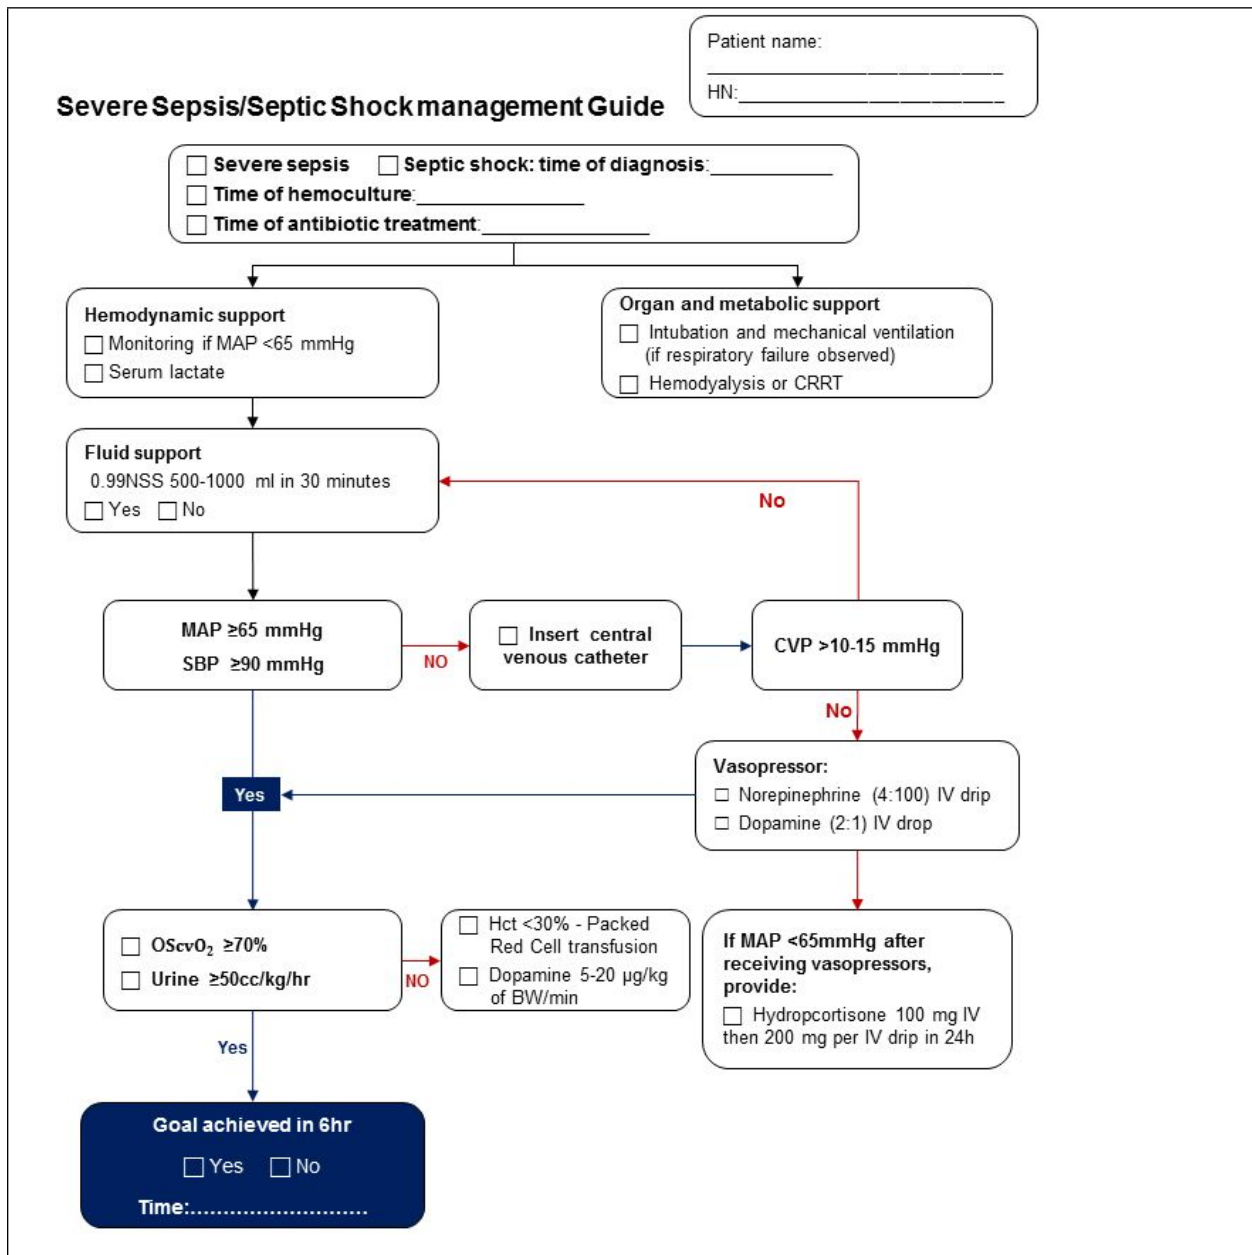

111

112

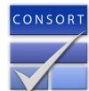

## CONSORT 2010 checklist of information to include when reporting a randomised trial\*

| Section/Topic                    | Item No | Checklist item                                                                                                                                                                              | Reported on page No |
|----------------------------------|---------|---------------------------------------------------------------------------------------------------------------------------------------------------------------------------------------------|---------------------|
| <b>Title and abstract</b>        |         |                                                                                                                                                                                             |                     |
|                                  | 1a      | Identification as a randomised trial in the title                                                                                                                                           | 1                   |
|                                  | 1b      | Structured summary of trial design, methods, results, and conclusions (for specific guidance see CONSORT for abstracts)                                                                     | 3                   |
| <b>Introduction</b>              |         |                                                                                                                                                                                             |                     |
| Background and objectives        | 2a      | Scientific background and explanation of rationale                                                                                                                                          | 5-6                 |
|                                  | 2b      | Specific objectives or hypotheses                                                                                                                                                           | 6                   |
| <b>Methods</b>                   |         |                                                                                                                                                                                             |                     |
| Trial design                     | 3a      | Description of trial design (such as parallel, factorial) including allocation ratio                                                                                                        | 7-8                 |
|                                  | 3b      | Important changes to methods after trial commencement (such as eligibility criteria), with reasons                                                                                          | -                   |
| Participants                     | 4a      | Eligibility criteria for participants                                                                                                                                                       | 8-9                 |
|                                  | 4b      | Settings and locations where the data were collected                                                                                                                                        | 7                   |
| Interventions                    | 5       | The interventions for each group with sufficient details to allow replication, including how and when they were actually administered                                                       | 9-10                |
| Outcomes                         | 6a      | Completely defined pre-specified primary and secondary outcome measures, including how and when they were assessed                                                                          | 10-11               |
|                                  | 6b      | Any changes to trial outcomes after the trial commenced, with reasons                                                                                                                       | -                   |
| Sample size                      | 7a      | How sample size was determined                                                                                                                                                              | 11                  |
|                                  | 7b      | When applicable, explanation of any interim analyses and stopping guidelines                                                                                                                | -                   |
| <b>Randomisation:</b>            |         |                                                                                                                                                                                             |                     |
| Sequence generation              | 8a      | Method used to generate the random allocation sequence                                                                                                                                      | 9                   |
|                                  | 8b      | Type of randomisation; details of any restriction (such as blocking and block size)                                                                                                         | -                   |
| Allocation concealment mechanism | 9       | Mechanism used to implement the random allocation sequence (such as sequentially numbered containers), describing any steps taken to conceal the sequence until interventions were assigned | 9                   |
| Implementation                   | 10      | Who generated the random allocation sequence, who enrolled participants, and who assigned participants to interventions                                                                     | 9                   |
| Blinding                         | 11a     | If done, who was blinded after assignment to interventions (for example, participants, care providers, those                                                                                | -                   |

|                                                      |     |                                                                                                                                                   |       |
|------------------------------------------------------|-----|---------------------------------------------------------------------------------------------------------------------------------------------------|-------|
|                                                      |     | assessing outcomes) and how                                                                                                                       |       |
|                                                      | 11b | If relevant, description of the similarity of interventions                                                                                       | -     |
| Statistical methods                                  | 12a | Statistical methods used to compare groups for primary and secondary outcomes                                                                     | 11-13 |
|                                                      | 12b | Methods for additional analyses, such as subgroup analyses and adjusted analyses                                                                  | 13    |
| <b>Results</b>                                       |     |                                                                                                                                                   |       |
| Participant flow (a diagram is strongly recommended) | 13a | For each group, the numbers of participants who were randomly assigned, received intended treatment, and were analysed for the primary outcome    | 13-14 |
|                                                      | 13b | For each group, losses and exclusions after randomisation, together with reasons                                                                  | -     |
| Recruitment                                          | 14a | Dates defining the periods of recruitment and follow-up                                                                                           | 13    |
|                                                      | 14b | Why the trial ended or was stopped                                                                                                                | -     |
| Baseline data                                        | 15  | A table showing baseline demographic and clinical characteristics for each group                                                                  | 14-15 |
| Numbers analysed                                     | 16  | For each group, number of participants (denominator) included in each analysis and whether the analysis was by original assigned groups           | 16-17 |
| Outcomes and estimation                              | 17a | For each primary and secondary outcome, results for each group, and the estimated effect size and its precision (such as 95% confidence interval) | 16-19 |
|                                                      | 17b | For binary outcomes, presentation of both absolute and relative effect sizes is recommended                                                       | 17-19 |
| Ancillary analyses                                   | 18  | Results of any other analyses performed, including subgroup analyses and adjusted analyses, distinguishing pre-specified from exploratory         | 19    |
| Harms                                                | 19  | All important harms or unintended effects in each group (for specific guidance see CONSORT for harms)                                             | -     |
| <b>Discussion</b>                                    |     |                                                                                                                                                   |       |
| Limitations                                          | 20  | Trial limitations, addressing sources of potential bias, imprecision, and, if relevant, multiplicity of analyses                                  | 22-23 |
| Generalisability                                     | 21  | Generalisability (external validity, applicability) of the trial findings                                                                         | 23    |
| Interpretation                                       | 22  | Interpretation consistent with results, balancing benefits and harms, and considering other relevant evidence                                     | 20-22 |
| <b>Other information</b>                             |     |                                                                                                                                                   |       |
| Registration                                         | 23  | Registration number and name of trial registry                                                                                                    | 4     |
| Protocol                                             | 24  | Where the full trial protocol can be accessed, if available                                                                                       | -     |
| Funding                                              | 25  | Sources of funding and other support (such as supply of drugs), role of funders                                                                   | 24-25 |

\*We strongly recommend reading this statement in conjunction with the CONSORT 2010 Explanation and Elaboration for important clarifications on all the items. If relevant, we also recommend reading CONSORT extensions for cluster randomised trials, non-inferiority and equivalence trials, non-pharmacological treatments, herbal interventions, and pragmatic trials. Additional extensions are forthcoming: for those and for up to date references relevant to this checklist, see [www.consort-statement.org](http://www.consort-statement.org).

# BMJ Open

## Effectiveness of a sepsis programme in a resource-limited setting

|                                 |                                                                                                                                                                                                                                                                                                                                                                                                                                                                                                                                                                                                                                                                                                                                                                                                                                                                                                                                                                                                                                                                                                                                                                                                                                                                                                                                                                                                   |
|---------------------------------|---------------------------------------------------------------------------------------------------------------------------------------------------------------------------------------------------------------------------------------------------------------------------------------------------------------------------------------------------------------------------------------------------------------------------------------------------------------------------------------------------------------------------------------------------------------------------------------------------------------------------------------------------------------------------------------------------------------------------------------------------------------------------------------------------------------------------------------------------------------------------------------------------------------------------------------------------------------------------------------------------------------------------------------------------------------------------------------------------------------------------------------------------------------------------------------------------------------------------------------------------------------------------------------------------------------------------------------------------------------------------------------------------|
| Journal:                        | <i>BMJ Open</i>                                                                                                                                                                                                                                                                                                                                                                                                                                                                                                                                                                                                                                                                                                                                                                                                                                                                                                                                                                                                                                                                                                                                                                                                                                                                                                                                                                                   |
| Manuscript ID                   | bmjopen-2020-041022.R1                                                                                                                                                                                                                                                                                                                                                                                                                                                                                                                                                                                                                                                                                                                                                                                                                                                                                                                                                                                                                                                                                                                                                                                                                                                                                                                                                                            |
| Article Type:                   | Original research                                                                                                                                                                                                                                                                                                                                                                                                                                                                                                                                                                                                                                                                                                                                                                                                                                                                                                                                                                                                                                                                                                                                                                                                                                                                                                                                                                                 |
| Date Submitted by the Author:   | 19-Oct-2020                                                                                                                                                                                                                                                                                                                                                                                                                                                                                                                                                                                                                                                                                                                                                                                                                                                                                                                                                                                                                                                                                                                                                                                                                                                                                                                                                                                       |
| Complete List of Authors:       | Booraphun, Suchart; Sunpasithiprasong Hospital, Medical Department Hantrakun, Viriya; Mahidol Oxford Tropical Medicine Research Unit, Microbiology<br>Siriboon, Suwatthiya; Sunpasithiprasong Hospital<br>Boonsri, Chaiyaporn ; Sunpasithiprasong Hospital, Emergency Department<br>Poomthong, Pulyamon; Sunpasithiprasong Hospital<br>Singkaew, Bung-Orn; Sunpasithiprasong Hospital<br>Wasombat, Oratai; Sunpasithiprasong Hospital<br>Chamnan, Parinya; Sunpasithiprasong Hospital<br>Champunot, Ratapum; Buddhachinaraj Phitsanulok Hospital, Department of Internal Medicine<br>Rudd, Kristina; University of Pittsburgh, Department of Critical Care Medicine<br>Day, Nicholas; Mahidol Oxford Tropical Medicine Research Unit; Univerity of Oxford Nuffield Department of Medicine, Centre for Tropical Medicine<br>Dondorp, Arjen; Mahidol Oxford Tropical Medicine Research Unit; Univerity of Oxford Nuffield Department of Medicine, Centre for Tropical Medicine<br>Teparrukkul, Prapit; Sunpasithiprasong Hospital<br>West, Timothy Eoin; University of Washington, Division of Pulmonary, Critical Care, and Sleep Medicine; Mahidol University Faculty of Tropical Medicine, Department of Microbiology and Immunology<br>Limmathurotsakul, Direk; Mahidol Oxford Tropical Medicine Research Unit; Mahidol University Faculty of Tropical Medicine, Department of Tropical Hygiene |
| <b>Primary Subject Heading</b>: | Intensive care                                                                                                                                                                                                                                                                                                                                                                                                                                                                                                                                                                                                                                                                                                                                                                                                                                                                                                                                                                                                                                                                                                                                                                                                                                                                                                                                                                                    |
| Secondary Subject Heading:      | Infectious diseases, Epidemiology                                                                                                                                                                                                                                                                                                                                                                                                                                                                                                                                                                                                                                                                                                                                                                                                                                                                                                                                                                                                                                                                                                                                                                                                                                                                                                                                                                 |
| Keywords:                       | Epidemiology < INFECTIOUS DISEASES, INFECTIOUS DISEASES, INTENSIVE & CRITICAL CARE                                                                                                                                                                                                                                                                                                                                                                                                                                                                                                                                                                                                                                                                                                                                                                                                                                                                                                                                                                                                                                                                                                                                                                                                                                                                                                                |
|                                 |                                                                                                                                                                                                                                                                                                                                                                                                                                                                                                                                                                                                                                                                                                                                                                                                                                                                                                                                                                                                                                                                                                                                                                                                                                                                                                                                                                                                   |

1  
2  
3  
4  
5  
6  
7  
8  
9  
10  
11  
12  
13  
14  
15  
16  
17  
18  
19  
20  
21  
22  
23  
24  
25  
26  
27  
28  
29  
30  
31  
32  
33  
34  
35  
36  
37  
38  
39  
40  
41  
42  
43  
44  
45  
46  
47  
48  
49  
50  
51  
52  
53  
54  
55  
56  
57  
58  
59  
60

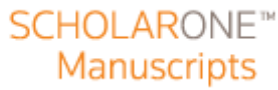





I, the Submitting Author has the right to grant and does grant on behalf of all authors of the Work (as defined in the below author licence), an exclusive licence and/or a non-exclusive licence for contributions from authors who are: i) UK Crown employees; ii) where BMJ has agreed a CC-BY licence shall apply, and/or iii) in accordance with the terms applicable for US Federal Government officers or employees acting as part of their official duties; on a worldwide, perpetual, irrevocable, royalty-free basis to BMJ Publishing Group Ltd ("BMJ") its licensees and where the relevant Journal is co-owned by BMJ to the co-owners of the Journal, to publish the Work in this journal and any other BMJ products and to exploit all rights, as set out in our [licence](#).

The Submitting Author accepts and understands that any supply made under these terms is made by BMJ to the Submitting Author unless you are acting as an employee on behalf of your employer or a postgraduate student of an affiliated institution which is paying any applicable article publishing charge ("APC") for Open Access articles. Where the Submitting Author wishes to make the Work available on an Open Access basis (and intends to pay the relevant APC), the terms of reuse of such Open Access shall be governed by a Creative Commons licence – details of these licences and which [Creative Commons](#) licence will apply to this Work are set out in our licence referred to above.

Other than as permitted in any relevant BMJ Author's Self Archiving Policies, I confirm this Work has not been accepted for publication elsewhere, is not being considered for publication elsewhere and does not duplicate material already published. I confirm all authors consent to publication of this Work and authorise the granting of this licence.

1  
2  
3 **1 Effectiveness of a sepsis programme in a resource-limited setting**  
4  
5  
6  
7

8  
9  
10  
11  
12  
13  
14  
15  
16  
17  
18  
19  
20  
21  
22  
23  
24  
25  
26  
27  
28  
29  
30  
31  
32  
33  
34  
35  
36  
37  
38  
39  
40  
41  
42  
43  
44  
45  
46  
47  
48  
49  
50  
51  
52  
53  
54  
55  
56  
57  
58  
59  
60

3 Suchart Booraphun MD<sup>1</sup>, Viriya Hantrakun PhD<sup>2</sup>, Suwatthiya Siriboon MD<sup>1</sup>, Chaiyaporn Boonsri  
4 MD<sup>1</sup>, Pulyamon Poomthong MD<sup>1</sup>, Bung-Orn Singkaew BNS<sup>1</sup>, Oratai Wasombat BNS<sup>1</sup>, Parinya  
5 Chamnan MD, PhD<sup>1</sup>, Ratapum Champunot MD<sup>3</sup>, Kristina Rudd MD, MPH<sup>4,5</sup>, Nicholas PJ. Day<sup>2,6</sup>  
6 MD<sup>2</sup>, PhD, Arjen M. Dondorp MD, PhD<sup>2,6</sup>, Prapit Teparrukkul MD<sup>1</sup>, T. Eoin West MD, MPH<sup>5,7</sup>,  
7 Direk Limmathurotsakul MD, PhD<sup>2,6,8</sup>

8  
9 Short Title: Sepsis Fast Track Thailand  
10

11 <sup>1</sup>Sunpasitthiprasong Hospital, Ubon Ratchathani, Thailand

12 <sup>2</sup>Mahidol Oxford Tropical Medicine Research Unit, Faculty of Tropical Medicine, Mahidol  
13 University, Bangkok, Thailand

14 <sup>3</sup>Department of Internal Medicine, Buddhachinaraj Phitsanulok Hospital, Phitsanulok, Thailand

15 <sup>4</sup>Department of Critical Care Medicine, University of Pittsburgh, Pittsburgh, Pennsylvania, USA

16 <sup>5</sup>Division of Pulmonary, Critical Care, and Sleep Medicine, University of Washington, Seattle,  
17 United States

18 <sup>6</sup>Centre for Tropical Medicine and Global Health, Nuffield Department of Medicine, University  
19 of Oxford, Churchill Hospital, Oxford, United Kingdom

20 <sup>7</sup>Department of Microbiology and Immunology, Faculty of Tropical Medicine, Mahidol  
21 University, Bangkok, Thailand

1  
2  
3 22 <sup>8</sup>Department of Tropical Hygiene, Faculty of Tropical Medicine, Mahidol University, Bangkok,  
4  
5 23 Thailand  
6  
7  
8 24  
9

10 25 **\*Corresponding author:** Assoc. Prof. Direk Limmathurotsakul, Mahidol-Oxford Tropical  
11  
12 26 Medicines Research Unit, Faculty of Tropical Medicine, Mahidol University, 420/6 Rajvithi Road,  
13  
14 27 Bangkok, 10400, Thailand. Tel: +66 2 203 6333, E-mail: [direk@tropmedres.ac](mailto:direk@tropmedres.ac) (DL)  
15  
16  
17 28  
18

19 29 **Word count:** abstract 300, text 3,829  
20

21 30 **Number of pages:** 32, Tables: 2; Figures: 1, Supporting Information: 1  
22  
23

24 31 **Keywords:** sepsis, sepsis care, sepsis management, mortality, resource limited setting  
25  
26 32  
27  
28  
29  
30  
31  
32  
33  
34  
35  
36  
37  
38  
39  
40  
41  
42  
43  
44  
45  
46  
47  
48  
49  
50  
51  
52  
53  
54  
55  
56  
57  
58  
59  
60

1  
2  
3 **33 Abstract**  
4

5 **34 Objective:** To evaluate the effectiveness of a Sepsis Fast Track (SFT) programme initiated at a  
6  
7 regional referral hospital in Thailand in January 2015  
8  
9

10 **36 Design:** A retrospective analysis using the data of a prospective observational study (Ubon-sepsis)  
11  
12 from March 2013 to January 2017  
13

14 **38 Setting:** General medical wards and medical intensive care units (ICUs) of a study hospital  
15

16 **39 Participants:** Patients with community-acquired sepsis observed under the Ubon-sepsis cohort.  
17  
18 Sepsis was defined as modified Sequential Organ Failure Assessment (SOFA) score  $\geq 2$ .  
19  
20

21 **41 Main exposure:** The SFT programme was a protocol to identify and initiate sepsis care on hospital  
22  
23 admission, implemented at the study hospital in 2015. Patients in the SFT programme were  
24  
25 admitted directly to the ICUs when available. The non-exposed group comprised of patients who  
26  
27 received standard of care.  
28  
29

30 **45 Main outcome:** The primary outcome was 28-day mortality. The secondary outcomes were  
31  
32 measured sepsis management interventions.  
33  
34

35 **47 Results:** Of 3,806 sepsis patients, 903 (24%) were detected and enrolled in the SFT programme  
36  
37 of the study hospital (SFT group) and 2,903 received standard of care (non-exposed group).  
38  
39 Patients in the SFT group had more organ dysfunction, were more likely to receive measured sepsis  
40  
41 management and to be admitted directly to the ICU (19% vs. 4%). Patients in the SFT group were  
42  
43 more likely to survive (adjusted hazard ratio 0.72; 95% CI 0.58 to 0.88,  $p=0.001$ ) adjusted for  
44  
45 admission year, gender, age, comorbidities, modified SOFA score and direct admission to the  
46  
47 ICUs. The benefit of the SFT programme was not influenced by direct admission to the ICUs  
48  
49  
50  
51  
52 (p=0.44).  
53  
54  
55  
56  
57  
58  
59  
60

1  
2  
3 55 **Conclusions:** The SFT programme is associated with improved sepsis care and lower risk of death  
4  
5 56 in sepsis patients in rural Thailand, where some critical care resources are limited. The survival  
6  
7 57 benefit is observed even when patients enrolled in the programme could not be admitted directly  
8  
9 58 into the ICUs.

10  
11  
12 59 **Study registration number:** NCT02217592  
13  
14  
15 60

### 18 61 **Strengths and limitations of this study**

- 20 62 • The study hospital utilized the published framework, SCAN-TEACH-TREAT programme  
21 63 to develop a context specific quality of care improvement for sepsis in a tropical resource-  
22 64 limited setting.
- 23 65 • The study took advantage of a robust prospective observational study design that  
24 66 strengthened causal inference by providing pre-intervention information, having an  
25 67 appropriate control group from both pre and post-intervention periods, and controlling  
26 68 important confounding factors (i.e. the modified SOFA score).
- 27 69 • We found that most measured sepsis interventions increased and that admission to the ICUs  
28 70 were not associated with the survival benefit of the sepsis programme.
- 29 71 • The study did not record dosage of dobutamine, dopamine, epinephrine and  
30 72 norepinephrine, arterial blood gases were rarely performed, and the modified SOFA score  
31 73 (maximum 23) may be lower than the SOFA score (maximum 24).
- 32 74 • The observational study may have residual confounding factors such as improvement of  
33 75 care and profile of organ failure recognition overtimes.

## 76 INTRODUCTION

77 Sepsis is defined as life-threatening organ dysfunction caused by a dysregulated host response to  
78 infection,<sup>1</sup> and is the primary cause of death from infection, especially if not recognized and treated  
79 promptly.<sup>2-4</sup> Sepsis is a major cause of health loss worldwide and is associated with approximately  
80 eleven million deaths each year, most of which occur in low and middle-income countries  
81 (LMICs).<sup>5</sup> The United Nations World Health Assembly has recognized sepsis as a global health  
82 priority and adopted a resolution on improving its worldwide prevention, diagnosis and  
83 management.<sup>6</sup> Comprehensive guidelines such as those developed by the Surviving Sepsis  
84 Campaign have been associated with reduced mortality in high-income countries,<sup>2-4</sup> but  
85 effectiveness of these guidelines in LMICs needs more evaluation.<sup>7-10</sup>

86  
87 Following the Surviving Sepsis Campaign (SSC) 2012,<sup>11</sup> the Ministry of Public Health Thailand  
88 and the Thai Society of Critical Care Medicine developed local recommendations on sepsis based  
89 on resource availability and local context.<sup>12</sup> The recommendations suggest that secondary-care and  
90 tertiary-care hospitals in the country should develop a Sepsis Fast Track (SFT) so that, on  
91 presentation, sepsis patients can be identified, treated and directly admitted to the ICUs when  
92 available. One small retrospective study showed lower mortality among sepsis patients enrolled  
93 than those not enrolled in the SFT (21% vs. 43%) at the study hospital,<sup>13</sup> while another study did  
94 not find an association between SFT and mortality outcome.<sup>14</sup> These studies were subject to  
95 selection biases due to their retrospective nature.<sup>13-14</sup> Interventional studies to randomize patients  
96 to receive or not receive the SFT, however, would be unethical and impractical after the national  
97 recommendations have been implemented. It is increasingly recommended to evaluate the impact

1  
2  
3 98 of healthcare interventions using routine data, particularly when a wide range of routinely collected  
4  
5 99 data is available.<sup>15</sup>  
6  
7

8 100  
9  
10 101 Here, we analysed data from our prospective observational study of community-acquired sepsis  
11  
12 102 patients presenting to a referral hospital in Thailand over four years (from March 2013 to January  
13  
14 103 2017)<sup>16-17</sup> to retrospectively evaluate the effectiveness of a SFT programme which was  
15  
16 104 implemented at the study hospital in January 2015.  
17  
18  
19

20 105

## 21 22 106 **MATERIAL AND METHODS**

### 23 24 107 **Study design**

25  
26  
27 108 We conducted a retrospective study to evaluate the effectiveness of the SFT programme by using  
28  
29 109 the data of a prospective observational study (Ubon-sepsis).<sup>16-17</sup> The SFT programme was  
30  
31 110 implemented at the study hospital in January 2015. The SFT programme at the study hospital  
32  
33 111 included (1) diagnostic criteria for attending physicians and medical teams to systematically  
34  
35 112 identify sepsis patients on hospital admission (Supplementary Table 1), (2) a recommended sepsis  
36  
37 113 care protocol and (3) direct admission to the ICUs when available. The SFT programme at the  
38  
39 114 study hospital was generated by the SFT committee of the study hospital (S.B., S.S., C.B., P.P.,  
40  
41 115 B.S., O.W., P.C. and P.T.) based on SSC 2012,<sup>11</sup> resource availability and local context.<sup>12</sup>  
42  
43  
44  
45

46 116

47  
48 117 Details of the Ubon-sepsis cohort have been published elsewhere.<sup>16-17</sup> In short, the Ubon-sepsis  
49  
50 118 research team, who were not attending physicians or medical teams at the study hospital,  
51  
52 119 conducted a prospective observational study of community-acquired infections and sepsis from  
53  
54  
55  
56  
57  
58  
59  
60

1  
2  
3 120 March 2013 to January 2017.<sup>16-17</sup> The research team prospectively enrolled adult patients  $\geq 18$   
4  
5 121 years old who were admitted to the general medical wards and medical intensive care units (ICUs)  
6  
7 122 with a primary diagnosis of infection made by the attending physician, were within 24 hours of  
8  
9 123 admission to the study hospital, and had three of 20 systemic manifestations of infection  
10  
11 124 documented in the medical records (Supplementary Table 2). The 20 systemic manifestations of  
12  
13 125 the infections were consolidated from the 22 variables proposed as diagnostic criteria for sepsis  
14  
15 126 for SSC 2012.<sup>11</sup> The study team sequentially screened all medical patients by reviewing admission  
16  
17 127 logs in the emergency department (ED), medical wards, and medical ICUs twice daily (morning  
18  
19 128 and afternoon) on each working day. The Ubon-sepsis cohort was initiated in 2012 prior to the  
20  
21 129 implementation of SFT at the study hospital. The research team was not involved in any clinical  
22  
23 130 interventions; enrollment in the SFT programme and all medical treatment was performed by  
24  
25 131 attending physicians and medical teams. The research team did not adjust the study protocol,  
26  
27 132 inclusion criteria and exclusion criteria of the Ubon-sepsis cohort during the entire study period,  
28  
29 133 and the research team recorded whether participants in the Ubon-sepsis cohort were enrolled in  
30  
31 134 the SFT programme.  
32  
33  
34  
35  
36  
37  
38  
39

40 136 The reporting of this study follows the STROBE guidelines. Written, informed permission was  
41  
42 137 obtained from participants prior to enrollment in the Ubon-sepsis cohort.  
43  
44  
45  
46

## 47 139 **Participants**

48  
49 140 For this study, we evaluated patients who were included into the Ubon-sepsis cohort and had  
50  
51 141 community-acquired sepsis. Sepsis was defined as an infection with organ dysfunction in  
52  
53  
54  
55  
56  
57  
58  
59  
60



1  
2  
3 142 accordance with the 2016 international Consensus (Sepsis-3) guidelines for sepsis.<sup>1</sup> Organ  
4  
5 143 dysfunction was determined by a modified sequential (sepsis-based) organ failure assessment  
6  
7 144 (SOFA) score  $\geq 2$  as previously described.<sup>16-17</sup> The study was conducted in 2013 prior to the Sepsis-  
8  
9 145 3 definition, and inotropic and vasopressor agent doses were not recorded into the CRF.<sup>1, 18</sup> For  
10  
11 146 the cardiovascular component of the SOFA score, the scoring was modified such that subjects  
12  
13 147 were scored a maximum of 2 (on a 4-point scale) if they received only dobutamine or dopamine,  
14  
15 148 and scored a maximum of 3 if they received epinephrine or norepinephrine. For the respiratory  
16  
17 149 component of the SOFA score, as PaO<sub>2</sub>/FiO<sub>2</sub> indices were not available for the majority of  
18  
19 150 subjects due to infrequency of arterial blood gas tests, the score was modified as follows: Subjects  
20  
21 151 were scored a maximum of 2 (4-point scale) if they received advanced respiratory support  
22  
23 152 (endotracheal tube, gas powered or electrical powered mechanical ventilation) and arterial blood  
24  
25 153 gas test was not performed.<sup>16-17</sup> The Ubon-sepsis cohort excluded patients who were suspected of  
26  
27 154 having hospital-acquired infections (determined by the attending physician), hospitalized within  
28  
29 155 30 days prior to the current admission, or hospitalized at any facility for a total duration longer  
30  
31 156 than 72 hours prior to enrollment.  
32  
33  
34  
35  
36  
37  
38  
39

#### 40 158 **Main exposure**

41  
42 159 Main exposure of the study was the SFT programme. All patients included in the Ubon-sepsis  
43  
44 160 cohort from March 2013 to December 2014 who received standard care were considered as the  
45  
46 161 non-exposed group. Patients included in the Ubon-sepsis cohort from January 2015 to January  
47  
48 162 2017 who received standard care or were received care in the SFT programme by attending  
49  
50 163 medical teams using their criteria on admission (Supplementary Table 1) were considered as the  
51  
52  
53  
54  
55  
56  
57  
58  
59  
60

1  
2  
3 164 additional non-exposed group or as the SFT group, respectively. The Ubon-sepsis research team  
4  
5 165 were not involved in decision-making regarding enrollment to the SFT programme.  
6  
7

8 166

9  
10 167 Patients in the non-exposed group received standard care according to local guidelines. Patients in

11  
12 168 the SFT group received the standard of care along with a recommended sepsis care protocol of the

13  
14 169 SFT programme. First, preprinted recommended doctor orders for the SFT programme were used

15  
16  
17 170 as of January 2015 (Supplementary Figure 1). The recommended orders included oxygen

18  
19 171 administration, intravenous fluid loading and fluid administration to achieve the recommended

20  
21 172 target of 30 mL/kg crystalloid, blood culture, recommended stat (immediate) doses and choices of

22  
23 173 parenteral antibiotics including ceftriaxone, ceftazidime, cloxacillin, metronidazole and

24  
25 174 gentamycin, contact ICU for ICU admission (if available), oxygen supplementation, close

26  
27 175 monitoring of vital signs and urine output, and a set of diagnostic tests including chest radiography,

28  
29 176 electrocardiogram, rapid blood glucose test, serum lactate, complete blood count, blood urea

30  
31 177 nitrogen, creatinine, electrolytes, liver function tests, albumin level, prothrombin time and partial

32  
33 178 thromboplastin time. Second, as of March 2016, the resuscitation workflow to normalize and

34  
35 179 maintain a mean arterial pressure (MAP)  $\geq 65$  mmHg, systolic blood pressure (SBP)  $\geq 90$  mmHg

36  
37 180 and urine output  $\geq 0.5$  mL/kg/hr within the first six hours was formally implemented and

38  
39 181 recommended (Supplementary Figure 2). The resuscitation workflow included fluid resuscitation,

40  
41 182 measurement of central venous pressure (CVP) and central venous oxygen saturation (SCVO<sub>2</sub>),

42  
43 183 administration of adrenergic agents, blood transfusion for haematocrit  $< 30\%$  and hydrocortisone

44  
45 184 if adequate fluid resuscitation and vasopressor therapy could not restore hemodynamic stability.

46  
47 185 The resuscitation workflow was pre-printed and included in the clinical chart of every SFT patient

1  
2  
3 186 (together with pre-printed doctor's orders), and was recommended even if patients could not be  
4  
5 187 admitted directly to the ICU. A separate set of documents, recommended management and  
6  
7 188 recommended frequency of vital signs monitoring for nurses (i.e. nurse notes for SFT patients)  
8  
9  
10 189 were also used for every SFT patient. Preparation and regular meetings to implement and monitor  
11  
12 190 the SFT programme were organized by the SFT committee of Sunpasitthiprasong Hospital.  
13  
14  
15 191

## 16 17 192 **Outcome measures**

18  
19 193 The primary outcome measure was 28-day mortality as recorded in the Ubon-sepsis cohort.<sup>16</sup> 28-  
20  
21 194 day mortality data were collected via telephone contact if subjects were no longer hospitalized and  
22  
23 195 had been discharged alive.<sup>16</sup> The secondary outcome measures were sepsis management  
24  
25 196 interventions; including antibiotics administration, blood cultures, mechanical ventilation,  
26  
27 197 adrenergic agents, acute haemodialysis and placement of a urinary catheter within the first day of  
28  
29 198 hospitalization.<sup>16-17</sup>  
30  
31  
32

## 33 199 34 35 200 **Sample size**

36  
37 201 The sample size of the study was determined by the sample size of Ubon-sepsis cohort. We  
38  
39 202 assumed that about 50% of 3,806 sepsis patients in the Ubon-sepsis cohort were enrolled after the  
40  
41 203 implementation of the SFT programme, of which 50% were enrolled in the SFT programme (i.e.  
42  
43 204 952 and 2,854 patients were estimated to be the SFT and non-exposed group, respectively). We  
44  
45 205 assumed that the mortality of the non-exposed group was 21% based on published data.<sup>16-17</sup> Our  
46  
47 206 current sample size of 3,806 would provide a power of 80% at an alpha error of 5% to detect a  
48  
49 207 4% difference in the mortality outcome.  
50  
51  
52  
53  
54  
55  
56  
57  
58  
59  
60

208

**209 Statistical analysis**

210 All sepsis patients were included in the analysis regardless of whether they were enrolled before  
211 or after the implementation of the SFT programme. We used the Chi-square test and Mann-  
212 Whitney test to compare the proportions of binary variables and median of continuous variables  
213 between groups, respectively. The interquartile range is presented as 25<sup>th</sup> and 75<sup>th</sup> percentiles.

214  
215 In the primary analysis, we used multivariable Cox proportional hazard models to evaluate the  
216 effectiveness of SFT programme on 28-day mortality. The multivariable Cox proportional hazard  
217 model was used to adjust the difference between those receiving the SFT programme and the  
218 others.<sup>19</sup> To reduce bias in the model development, we used the previous multivariable Cox  
219 proportional hazard model as the base model,<sup>16</sup> added the SFT group variable and direct admission  
220 to the ICU, and modified by adding a time variable to represent possible changes over time and by  
221 using continuous modified SOFA score on admission rather than as a binary variable (modified  
222 SOFA score  $\geq 2$ ). Twenty eight patients enrolled in early 2017 were considered as enrolled in  
223 2016. The continuous modified SOFA score was used to improve regression adjustment for disease  
224 severity of the model. The other variables included in the model were gender, age group, transfer  
225 from other hospital, comorbidities (diabetes mellitus, chronic kidney disease, liver disease and  
226 malignancy) and blood culture positive for pathogenic organisms. We tested potential predefined  
227 interactions between the SFT programme and direct admission to the ICUs. Using a conceptual  
228 framework, we also consider that admission directly to the ICU could also be caused by the SFT;  
229 therefore, we developed another multivariable model not including the variable for direct

1  
2  
3 230 admission to the ICU. The goodness of fit for the multivariable Cox proportional hazard model  
4  
5 231 was tested with a Hosmer and Lemeshow test. For the Cox proportional hazard model, we assessed  
6  
7  
8 232 whether the hazard ratio was constant over time using Schoenfeld residuals.  
9

10 233  
11  
12 234 For the secondary endpoints, we used multivariable logistic regression models with similar  
13  
14 235 independent variables as the model for 28-mortality outcome and used each sepsis management  
15  
16 236 process as an outcome. We estimated the total effect of the SFT on each sepsis management by  
17  
18 237 using the multivariable logistic regression models adjusted for difference in characteristics and  
19  
20 238 disease severity of the patients. This was because each sepsis management could be caused by  
21  
22 239 characteristics of the patients, disease severity and the SFT.<sup>20</sup>  
23  
24  
25

26 240  
27  
28 241 We also performed sensitivity analyses by excluding patients enrolled prior to the implementation  
29  
30 242 of the SFT programme and by replacing direct admission to the ICUs with admission to the ICUs  
31  
32 243 within the first hospital day. All analyses were performed with STATA 15.1 (StataCorp, College  
33  
34 244 Station, TX, USA).  
35  
36

37 245  
38  
39  
40 246 **Patient and public involvement**  
41  
42 247 No patients were involved in setting the research question or the outcome measures, nor were they  
43  
44 248 involved in developing plans for recruitment, design, or implementation of the study. No patients  
45  
46 249 were asked to advice on interpretation or writing the results. The results will be disseminated to  
47  
48 250 the public through online social media.  
49  
50

51 251  
52  
53  
54  
55  
56  
57  
58  
59  
60

## 252 RESULTS

### 253 Baseline characteristics

254 The observational cohort study (Ubon-sepsis) included 5,001 patients presenting with community-  
255 acquired infections from March 2013 to January 2017, and 12 patients were excluded due to  
256 unknown 28-day mortality outcome. 3,806 (76%) met criteria for sepsis within the first 24 hours  
257 of admission with a modified SOFA score  $\geq 2$ , and were included for the analysis. Figure 1 shows  
258 the flow of participants through the study. Among 3,806 sepsis patients, 903 were enrolled in the  
259 SFT programme and considered as the SFT group, and 2,903 were not enrolled in the SFT  
260 programme, received standard of care, and considered as the non-exposed group. Of 2,903 sepsis  
261 patients in the non-exposed group, 1,636 were included in the observational cohort study prior to  
262 the implementation of SFT programme and 1,267 were after the implementation of the programme.

263  
264 Table 1 shows the characteristics of the study patients. Patients in the SFT group were older and  
265 more likely to have underlying diseases of diabetes mellitus, cerebrovascular diseases and  
266 dyslipidemia. Patients included in the SFT group had higher severity of organ dysfunction  
267 determined by the modified SOFA score compared with the non-exposed group (median 6 [IQR  
268 4-9] vs. 4 [IQR 3-6],  $p < 0.001$ ). A higher proportion of patients in the SFT group were admitted  
269 directly to the ICU compared with the non-exposed group (19% vs 5%,  $p < 0.001$ ).

270

271 **Table 1| Baseline characteristics of sepsis patients enrolled in the Sepsis Fast Track**  
 272 **programme<sup>1</sup> (SFT group) or standard of care (non-exposed group). Values are number**  
 273 **(percentages) unless stated otherwise**

| Characteristics                                 | SFT group <sup>2</sup><br>(n=903) | Non-exposed<br>group <sup>3</sup><br>(n=2903) | P value |
|-------------------------------------------------|-----------------------------------|-----------------------------------------------|---------|
| <b>Male gender</b>                              | 526 (58%)                         | 1653 (57%)                                    | 0.49    |
| <b>Age (years) (median [IQR])</b>               | 63 (49-74)                        | 56 (39-70)                                    | <0.001  |
| <b>Age group (years)</b>                        |                                   |                                               |         |
| 18-40                                           | 100 (11%)                         | 647 (22%)                                     | <0.001  |
| >40-60                                          | 277 (31%)                         | 875 (30%)                                     |         |
| >60-70                                          | 214 (24%)                         | 513 (18%)                                     |         |
| >70                                             | 312 (35%)                         | 868 (30%)                                     |         |
| <b>Comorbidities</b>                            |                                   |                                               |         |
| Hypertension                                    | 239 (26%)                         | 726 (25%)                                     | 0.38    |
| Diabetes mellitus                               | 213 (24%)                         | 594 (20%)                                     | 0.05    |
| Chronic kidney disease                          | 129 (14%)                         | 391 (13%)                                     | 0.53    |
| Dyslipidemia                                    | 66 (7%)                           | 152 (5%)                                      | 0.02    |
| Heart disease                                   | 48 (5%)                           | 183 (6%)                                      | 0.28    |
| Lung disease                                    | 67 (7%)                           | 239 (8%)                                      | 0.43    |
| Liver disease                                   | 33 (4%)                           | 91 (3%)                                       | 0.44    |
| Cerebrovascular disease                         | 29 (3%)                           | 55 (2%)                                       | 0.02    |
| Malignancy                                      | 13 (1%)                           | 47 (2%)                                       | 0.71    |
| Human immunodeficiency virus (HIV)              | 6 (1%)                            | 33 (1%)                                       | 0.22    |
| <b>Organ dysfunction</b>                        |                                   |                                               |         |
| Modified SOFA score (median [IQR])              | 6 (4-9)                           | 4 (3-6)                                       | <0.001  |
| Renal dysfunction <sup>4</sup>                  | 706 (78%)                         | 1846 (64%)                                    | <0.001  |
| Cardiovascular dysfunction <sup>4</sup>         | 811 (90%)                         | 1532 (53%)                                    | <0.001  |
| Coagulation dysfunction <sup>4</sup>            | 419 (46%)                         | 1562 (54%)                                    | <0.001  |
| Liver dysfunction <sup>4</sup>                  | 311 (34%)                         | 822 (28%)                                     | 0.001   |
| Respiratory dysfunction <sup>4</sup>            | 337 (37%)                         | 853 (29%)                                     | <0.001  |
| Central nervous system dysfunction <sup>4</sup> | 166 (18%)                         | 530 (18%)                                     | 0.92    |
| <b>Transferred from other hospitals</b>         | 874 (97%)                         | 2372 (84%)                                    | <0.001  |
| <b>Duration of symptoms<br/>(median [IQR])</b>  | 2 (1-3)                           | 3 (1-5)                                       | <0.001  |
| ≤ 2 days                                        | 505 (56%)                         | 1191 (41%)                                    |         |
| 3-7 days                                        | 362 (40%)                         | 1488 (51%)                                    |         |
| > 7 days                                        | 36 (4%)                           | 224 (8%)                                      |         |

| Characteristics                                        | SFT group <sup>2</sup><br>(n=903) | Non-exposed<br>group <sup>3</sup><br>(n=2903) | P value |
|--------------------------------------------------------|-----------------------------------|-----------------------------------------------|---------|
| <b>Presenting clinical syndromes<sup>5</sup></b>       |                                   |                                               |         |
| Septic shock                                           | 687 (76%)                         | 733 (25%)                                     | <0.001  |
| Acute febrile illness                                  | 206 (23%)                         | 940 (32%)                                     | <0.001  |
| Lower respiratory infection                            | 223 (25%)                         | 890 (31%)                                     | 0.001   |
| Sepsis                                                 | 225 (25%)                         | 273 (9%)                                      | <0.001  |
| Others                                                 | 13 (1%)                           | 456 (16%)                                     | <0.001  |
| Diarrheal illness                                      | 150 (17%)                         | 264 (9%)                                      | <0.001  |
| <b>Admitted directly to an ICU upon admission</b>      | 170 (19%)                         | 128 (4%)                                      | <0.001  |
| <b>Admitted to an ICU within 24 hours of admission</b> | 270 (29%)                         | 370 (13%)                                     | <0.001  |
| <b>Blood culture positive for pathogenic organisms</b> | 175 (19%)                         | 347 (12%)                                     | <0.001  |
| <b>Year</b>                                            |                                   |                                               |         |
| 2013                                                   | N/A                               | 1047 (26%)                                    | <0.001  |
| 2014                                                   | N/A                               | 1156 (29%)                                    |         |
| 2015                                                   | 369 (39%)                         | 956 (24%)                                     |         |
| 2016                                                   | 556 (59%)                         | 869 (21%)                                     |         |
| 2017                                                   | 14 (1%)                           | 22 (1%)                                       |         |

274

275 <sup>1</sup> SFT programme was implemented at the study hospital in January 2015.

276 <sup>2</sup> 903 patients of the Ubon-sepsis cohort were enrolled in SFT programme after the implementation of the SFT  
277 programme (Figure 1)

278 <sup>3</sup> Included 1,636 and 1,267 patients in the Ubon-sepsis cohort before and after the implementation of the SFT  
279 programme, respectively.

280 <sup>4</sup> Organ dysfunction defined as modified SOFA score was  $\geq 1$  for each organ system.<sup>16</sup>

281 <sup>5</sup> Patients may have more than one presenting clinical syndrome.

282

### 283 Primary outcomes

284 The primary outcome, mortality within 28 days, occurred in 205 of 903 (23%) in the SFT group  
285 and 574 of 2,903 (20%) in the non-exposed group. In the primary analysis, patients in the SFT  
286 group were more likely to survive adjusted for baseline characteristics, severity of sepsis and direct



1  
2  
3 287 admission the ICUs (adjusted hazard ratio [aHR] 0.72, 95% CI 0.58-0.88, p=0.001; Table 2). Older  
4  
5 288 age, higher modified SOFA score, underlying disease of malignancy and chronic kidney disease,  
6  
7 289 blood culture positive for pathogenic organisms and direct admission to the ICUs were associated  
8  
9  
10 290 with risk of mortality.  
11

12 291  
13  
14  
15  
16  
17  
18  
19  
20  
21  
22  
23  
24  
25  
26  
27  
28  
29  
30  
31  
32  
33  
34  
35  
36  
37  
38  
39  
40  
41  
42  
43  
44  
45  
46  
47  
48  
49  
50  
51  
52  
53  
54  
55  
56  
57  
58  
59  
60

For peer review only

292 **Table 2| Factors associated with 28-day mortality using multivariable Cox proportional**  
 293 **hazards model**

| Variables                                              | Died<br>(n=779) | Survived<br>(n=3027) | Adjusted hazard ratio <sup>2</sup><br>(95%CI) | P value |
|--------------------------------------------------------|-----------------|----------------------|-----------------------------------------------|---------|
| <b>SFT group<sup>1</sup></b>                           | 205 (26%)       | 698 (23%)            | 0.72 (0.58- 0.88)                             | 0.001   |
| <b>Male gender</b>                                     | 445 (57%)       | 698 (23%)            | 0.87 (0.75- 1.01)                             | 0.06    |
| <b>Age group (years) (n [%])</b>                       |                 |                      |                                               |         |
| • 18-40                                                | 59 (8%)         | 688 (23%)            | 1                                             | <0.001  |
| • >40-60                                               | 222 (29%)       | 930 (31%)            | 1.72 (1.28- 2.30)                             |         |
| • >60-70                                               | 159 (20%)       | 568 (19%)            | 2.10 (1.54- 2.86)                             |         |
| • >70                                                  | 339 (44%)       | 841 (28%)            | 3.41 (2.57- 4.53)                             |         |
| <b>Transferred from other hospital</b>                 | 715 (92%)       | 2595 (86%)           | 1.14 (0.88- 1.49)                             | 0.33    |
| <b>Modified SOFA score (median, IQR)</b>               | 6 (4-9)         | 4 (3-6)              | 1.23 (1.21- 1.26)                             | <0.001  |
| <b>Comorbidities</b>                                   |                 |                      |                                               |         |
| • Diabetes mellitus                                    | 205 (26%)       | 602 (20%)            | 1.06 (0.90- 1.26)                             | 0.47    |
| • Chronic kidney disease                               | 141 (18%)       | 379 (13%)            | 1.22 (1.01- 1.48)                             | 0.04    |
| • Liver disease                                        | 39 (5%)         | 85 (3%)              | 1.27 (0.91- 1.76)                             | 0.16    |
| • Malignancy                                           | 24 (3%)         | 36 (1%)              | 2.64 (1.75- 3.99)                             | <0.001  |
| <b>Blood culture positive for pathogenic organisms</b> | 190 (24%)       | 332 (11%)            | 1.83 (1.55- 2.17)                             | <0.001  |
| <b>Year</b>                                            |                 |                      |                                               |         |
| • 2013                                                 | 165 (21%)       | 637 (21%)            | 1                                             | 0.30    |
| • 2014                                                 | 183 (23%)       | 651 (22%)            | 1.03 (0.83- 1.27)                             |         |
| • 2015                                                 | 207 (27%)       | 808 (27%)            | 1.05 (0.84- 1.31)                             |         |
| • 2016 <sup>2</sup>                                    | 224 (29%)       | 931 (31%)            | 0.88 (0.70- 1.11)                             |         |
| <b>Direct admission to the ICU</b>                     | 128 (16%)       | 170 (6%)             | 1.68 (1.36- 2.06)                             | <0.001  |

294 <sup>1</sup> Enrolled in the Sepsis Fast Track (SFT) programme.

295 <sup>2</sup> The hazard ratio of SFT was adjusted for gender, age group, transferred from other hospital, modified SOFA score,  
 296 comorbidities, blood culture positive for pathogenic organisms, year and direct admission to the ICU. The hazard  
 297 ratios of other variable could be considered as the controlled direct effect of those variables.<sup>20</sup>

1  
2  
3 298 <sup>2</sup>Included 28 patients in 2017  
4

5 299  
6  
7 300 In a pre-specified interaction test, we found consistency of the association between the SFT and  
8  
9 301 lower risk of mortality when stratifying by direct admission to the ICUs (interaction test p=0.44).  
10  
11 302 In the multivariable model including an interaction variable, the effect of SFT was comparable  
12  
13 303 among those admitted directly to the ICUs (aHR 0.81, 95% CI 0.56 to 1.18) and those admitted  
14  
15 304 directly to the general medical wards (aHR 0.69, 95% CI 0.56 to 0.86). Using a conceptual  
16  
17 305 framework, we considered that admission directly to the ICU could also be caused by the SFT;  
18  
19 306 therefore, we developed another multivariable model that did not adjust for direct admission to the  
20  
21 307 ICU. We observed that the effect of the SFT was comparable (aHR 0.77, 95% CI 0.63 to 0.94;  
22  
23 308 Supplementary Table 3).  
24  
25  
26  
27

28 309

### 30 310 **Secondary outcomes**

31  
32 311 Using multivariable logistic regression models, we found that patients in the SFT group were more  
33  
34 312 likely to receive most sepsis management interventions than patients in the non-exposed group  
35  
36 313 adjusting for baseline characteristics and severity of sepsis (Supplementary Table 4). Those  
37  
38 314 included antibiotics, blood cultures, adrenergic agents, and placement of a urinary catheter within  
39  
40 315 the first day of hospitalization. However, sepsis patients in the SFT group were less likely to  
41  
42 316 receive mechanical ventilation compared with those in the non-exposed group adjusting for  
43  
44 317 baseline characteristics, severity of sepsis and direct admission to the ICUs group (adjusted odds  
45  
46 318 ratio [aOR] 0.30; 95% CI 0.24 to 0.38). We found that direct admission to the ICUs (aOR 5.77,  
47  
48  
49  
50  
51  
52  
53  
54  
55  
56  
57

1  
2  
3 319 95% CI 4.20 to 7.92) and transfer from other hospitals (aOR 3.45, 95% CI 2.42 to 4.91) were  
4  
5 320 strongly associated with the requirement of mechanical ventilation.  
6  
7

8 321

9  
10 322 **Sensitivity Analyses**

11  
12 323 We performed a sensitivity analysis by excluding the 1,636 patients enrolled in the observational  
13  
14 324 study prior to the implementation of SFT programme. Similar differences in baseline  
15  
16 325 characteristics were observed when comparing 903 patients in the SFT group to the 1,267 patients  
17  
18 326 in the non-exposed group enrolled after the implementation of the SFT programme  
19  
20 327 (Supplementary Table 5). A higher chance of survival in the SFT group compared to the non-  
21  
22 328 exposed group was also observed (aHR 0.68, 95% CI 0.55 to 0.84,  $p < 0.001$ ; Supplementary Table  
23  
24 329 6). There was no interaction between the management intervention and direct admission to the  
25  
26 330 ICUs ( $p = 0.92$ ).  
27  
28  
29

30 331

31  
32  
33 332 We also performed another sensitivity analysis by replacing direct admission to the ICUs with  
34  
35 333 admission to the ICUs within the first hospital day. Of 3,806 patients, 640 (17%) were admitted to  
36  
37 334 the ICUs within the first day of admission. A higher chance of survival in the SFT group compared  
38  
39 335 to the non-exposed group was also observed (aHR 0.72, 95% CI 0.59 to 0.88,  $p = 0.002$ ). There was  
40  
41 336 also no interaction between the management intervention and admission to the ICUs within the  
42  
43 337 first day of admission ( $p = 0.29$ ).  
44  
45  
46

47 338  
48  
49  
50  
51  
52  
53  
54  
55  
56  
57  
58  
59  
60

1  
2  
3 **339 DISCUSSION**  
4

5 340 In this study evaluating patients with community-acquired sepsis, enrollment into a programme to  
6  
7 341 identify and initiate sepsis care implemented at the study hospital (SFT programme) was associated  
8  
9  
10 342 with 28% lower risk of mortality. In recent years, there has been an increasing need to understand  
11  
12 343 benefit and cost effectiveness of implementation of sepsis care interventions in LMICs because of  
13  
14 344 concerns that international sepsis guidelines<sup>11</sup> may not be extrapolated to patients with tropical  
15  
16 345 infectious diseases<sup>7-9</sup> and to resource-limited settings with poor ICU capacity.<sup>10</sup> In this study we  
17  
18 346 show the effectiveness of sepsis protocol modified based on resource availability in a tropical  
19  
20 347 country, where causes of community-acquired sepsis include malaria and tropical viral diseases.<sup>16</sup>  
21  
22 348 <sup>21-22</sup> Access to the ICU increased after the implementation of the SFT programme, but the majority  
23  
24 349 of sepsis patients were still managed on the general wards, including those with respiratory failure  
25  
26 350 or shock. Nonetheless, our study shows that enhancing sepsis care in the emergency department  
27  
28 351 and general medical wards, as well as improving access to ICUs can reduce sepsis mortality in a  
29  
30 352 LMIC.  
31  
32

33  
34  
35 353  
36  
37 354 The lower odds of receiving mechanical ventilation in the SFT group could be a sign of improved  
38  
39 355 sepsis care. Patients in the SFT group are monitored closely either in or outside the ICUs, and the  
40  
41 356 attending physicians aim to obviate the need for airway intubation when possible.<sup>7</sup> Attending  
42  
43 357 physicians may tend to provide mechanical ventilation to patients in the non-exposed group based  
44  
45 358 on broad indications such as (1) airway protection, (2) hypercapnic respiratory failure, (3)  
46  
47 359 hypoxemic respiratory failure or (4) circulatory failure<sup>23-24</sup> because they may not be able to monitor  
48  
49 360 patients' breathing and oxygen saturation as often as those enrolled in the SFT programme.  
50  
51  
52  
53  
54  
55  
56  
57  
58  
59  
60

1  
2  
3 361  
4  
5 362 It is not surprising that patients in the SFT group had more organ dysfunction than those in the  
6  
7 363 non-exposed group. This is because the severity of organ dysfunction among patients with septic  
8  
9 364 shock, respiratory failure and alteration of conscious can be assessed clinically on admission, and  
10  
11 365 those patients could be enrolled in the SFT programme when the laboratory test results were not  
12  
13 366 yet available. However, the non-exposed group were defined as having sepsis based on clinical  
14  
15 367 findings and all laboratory test results within 24 hours of admission (per protocol of Ubon-sepsis  
16  
17 368 cohort study<sup>16-17</sup>). Therefore, the non-exposed group could use laboratory test results (i.e. liver  
18  
19 369 function tests, creatinine level, international normalised ratio and activated partial thromplatin  
20  
21 370 time) from blood specimens drawn on admission. Therefore, the SFT programme were more likely  
22  
23 371 to enroll patients with obvious signs of sepsis and septic shock; such as acute respiratory failure  
24  
25 372 and hypotension, while Ubon-sepsis cohort could include sepsis patients with relatively lower  
26  
27 373 modified SOFA scores.  
28  
29  
30  
31  
32

33 374

### 35 375 **Comparison with other studies**

36  
37 376 Our study is not the first to evaluate effectiveness of sepsis intervention in LMICs. Early  
38  
39 377 recognition and protocol directed intervention improves outcomes of sepsis in adults<sup>25-27</sup> and  
40  
41 378 severe infection in children<sup>28</sup> in LMICs. The optimal method of fluid resuscitation in sepsis in  
42  
43 379 tropical LMICs has not been determined.<sup>8, 25, 29-30</sup> Our resuscitation protocol is a simple guideline,  
44  
45 380 and the SFT recommend doctors to be careful and adjust fluid resuscitation based on preliminary  
46  
47 381 diagnoses, underlying diseases and rapid diagnostic test results (i.e. if sepsis is caused by malaria  
48  
49 382 or dengue infection). The implementation of the SFT programme in our study hospital and in  
50  
51  
52  
53  
54  
55  
56  
57  
58  
59  
60

1  
2  
3 383 Thailand is consistent with the recommendation of “SCAN-TEACH-TREAT” programme  
4  
5 384 developed by Sepsis in Resource-Limited Settings Workgroup of the Surviving Sepsis Campaign.<sup>7</sup>  
6  
7  
8 385 The SFT programme evaluated resources in the setting (SCAN component), focused on  
9  
10 386 educational interventions on early recognition and management of sepsis among medical personnel  
11  
12 387 including physicians, nurses and students (TEACH component) and implemented pragmatic and  
13  
14 388 simple bundles into practice (TREAT component). In addition, the SFT programme has the strong  
15  
16 389 support and endorsement of local health and governmental leaders.<sup>12</sup>  
17  
18  
19 390

### 391 **Strength and limitations of the study**

392 This study features four strengths. First, the study hospital utilized the published framework,  
393 SCAN-TEACH-TREAT programme to develop a context specific quality of care improvement for  
394 sepsis,<sup>7</sup> and we closely monitor and evaluate the effectiveness of an intervention. Second, the study  
395 took advantage of a robust prospective observational study design that strengthened causal  
396 inference by providing pre-intervention information, having an appropriate non-exposed group  
397 from both pre and post-intervention periods, and controlling important confounding factors (i.e.  
398 the modified SOFA score) which were measured systematically throughout the study period.  
399 Third, this study incorporated several predictors of interest (measured sepsis management  
400 interventions and admission to the ICUs). This allows us to identify that most measured sepsis  
401 interventions increased and that admission to the ICUs were not associated with the survival  
402 benefit of the SFT programme. Fourth, the focus on sepsis at a public tertiary-care hospital in  
403 Thailand helped us to estimate the effect of sepsis protocol in a tropical resource-limited setting  
404 with large sample size.

1  
2  
3 405  
4  
5 406 Our study had several limitations. First, a modified SOFA score was used because the dosage of  
6  
7 407 dobutamine, dopamine, epinephrine and norepinephrine were not recorded and arterial blood gases  
8  
9 408 were rarely performed. The modified SOFA score (maximum 23) may be lower than the SOFA  
10  
11 409 score (maximum 24). Nonetheless, the modified SOFA score is strongly associated with mortality  
12  
13 410 in sepsis.<sup>16-17</sup> Second, the proportional hazards assumption was met for all variables, including  
14  
15 411 the main variable (the SFT), except one controlled variable (the modified SOFA score). The  
16  
17 412 adjusted effect estimates could be under or overestimated due to residual confounding factors such  
18  
19 413 as improvement of care and profile of organ failure recognition overtimes.  
20  
21  
22  
23  
24 414

## 25 26 415 **Conclusions and future implications**

27  
28 416 Our study successfully demonstrated effectiveness of a sepsis programme implemented in a LMIC.  
29  
30 417 Measuring effectiveness of a sepsis programme is a complex issue, and we utilized a data of a  
31  
32 418 prospective observational study and carefully controlled for severity of sepsis and temporal trends  
33  
34 419 in our analyses. Care in sepsis patients improved after the implementation of the programme.  
35  
36 420 Additional research is needed to better understand cost of the intervention, long-term benefits and  
37  
38 421 impact of the programme on a national scale. National strategies aimed at saving lives from sepsis  
39  
40 422 in LMICs should be encouraged. Such strategies should include analysis of resources and local  
41  
42 423 circumstances, followed by development, implementation and assessment of customized  
43  
44 424 programmes.  
45  
46  
47  
48  
49  
50 425



1  
2  
3 426 **Acknowledgement:**  
4

5 427 We thank all patients, their relatives, and staff of the Sunpasitthiprasong hospital who participated  
6  
7 428 in the study. We thank Mayura Malasit, Praweennuch Watanachaiprasert, Chayamon  
8  
9 429 Krainoonsing, Passaraporn Kesaphun, Nannicha Jirapornuwat, Gumphol Wongsuvan, Areeya  
10  
11 430 Faosap, Yaowaret Dokket, Sukhumal Pewlaorng, Jintana Suwannapruek, Prapass Wannapinij and  
12  
13 431 Diane Tomita for their clinical, laboratory and administrative support.  
14  
15  
16  
17 432

18  
19 433 **Contributors:**  
20

21 434 NPJD, TEW, and DL obtained grant funding. SB, VH, PT, TEW, and DL contributed to study  
22  
23 435 conception development and study design. SB, VH, PT, TEW and DL contributed to study  
24  
25 436 conduct, data collection, and study administration. VH and DL performed the statistical analysis  
26  
27 437 and interpreted the data and had full access to all of the data in the study. Both authors can take  
28  
29 438 responsibility for the integrity of the data and the accuracy of the data analysis. DL is a guarantor.  
30  
31 439 SB, VH, PT, TEW, and DL wrote the first draft of a manuscript, with input from SS, CB, PC, KR,  
32  
33 440 and AD. PP, BS, OW, and RC provided scientific or administrative support. All authors  
34  
35 441 contributed to results interpretation, critically revised, and approved the final submitted  
36  
37 442 manuscript. The corresponding author attests that all listed authors meet authorship criteria and  
38  
39 443 that no others meeting the criteria have been omitted.  
40  
41  
42  
43  
44 444

45  
46  
47 445 **Funding:**  
48

49 446 The study was funded by the Wellcome Trust (090219/Z/09/Z) and National Heart, Lung and  
50  
51 447 Blood Institute, National Institutes of Health (R01HL113382). DL is supported by an intermediate  
52  
53  
54  
55  
56  
57  
58  
59  
60

1  
2  
3 448 fellowship from the Wellcome Trust (101103/Z/13/Z). The funders had no role in the design and  
4  
5 449 conduct of the study, all study procedures, data collection, data analyses, data interpretation,  
6  
7  
8 450 writing of the report, and the decision to submit the article for publication.  
9

10 451

11  
12 452 **Competing interests:**

13  
14  
15 453 The authors declare that they have no completing interests.  
16

17 454

18  
19 455 **Ethics approvals:**

20  
21 456 The study was conducted the study in full compliance with the principles of good clinical practice  
22  
23 457 (GCP), and the ethical principles of the Declaration of Helsinki. The study protocol and related  
24  
25  
26 458 documents were approved by Sunpasitthiprasong Hospital Ethics Committee (039/2556), the  
27  
28 459 Ethics Committee of the Faculty of Tropical Medicine, Mahidol University (MUTM2012-024-  
29  
30 460 01), the University of Washington Institutional Review Board (42988) and the Oxford Tropical  
31  
32 461 Research Ethics Committee at the University of Oxford (OXTREC172-12). Signed or  
33  
34 462 fingerprinted informed consent was obtained from the participants or their representatives before  
35  
36  
37 463 enrollment.  
38

39  
40 464

41  
42 465 **Data sharing:**

43  
44 466 The final database with the data dictionary are publicly available online

45  
46  
47 467 <https://doi.org/10.6084/m9.figshare.12102627>.

48  
49 468 The lead authors (SB, VH and DL) affirm that the manuscript is an honest, accurate, and  
50  
51 469 transparent account of the study being reported; that no important aspects of the study have been  
52  
53  
54  
55  
56  
57

1  
2  
3 470 omitted; and that any discrepancies from the study as planned have been explained. This is an  
4  
5 471 Open Access article distributed in accordance with the terms of the Creative Commons Attribution  
6  
7 472 (CC BY 4.0) license, which permits unrestricted reuse, distribution, and reproduction in any  
8  
9  
10 473 medium, provided the original work is properly cited. See:  
11  
12 474 <http://creativecommons.org/licenses/by/4.0/>  
13  
14  
15 475

16  
17 476 **Dissemination to participants and related patient and public communities:**  
18

19 477 The results of this study will be disseminated to physicians at the study hospital, health care  
20  
21 478 providers, policy makers, and academic communities through various mediums, including printed  
22  
23 479 report, internal hospital meetings, academic conferences, and institutional networks. The results  
24  
25 480 from this study will be used to inform the current Sepsis Fast Track programme at  
26  
27 481 Sunpasitthiprasong hospital and the community hospitals which are located in jurisdiction of the  
28  
29 482 study hospital catchment areas in the Northeast Thailand. The study results will not be  
30  
31 483 disseminated to patients or general population, because study results are in medical context.  
32  
33  
34  
35  
36  
37  
38  
39  
40  
41  
42  
43  
44  
45  
46  
47  
48  
49  
50  
51  
52  
53  
54  
55  
56  
57  
58  
59  
60

484 **References**

- 485 1 Singer M, Deutschman CS, Seymour CW, et al. The Third International Consensus  
486 Definitions for Sepsis and Septic Shock (Sepsis-3). *JAMA* 2016;315(8):801-10.  
487 doi: 10.1001/jama.2016.0287
- 488 2 Rhodes A, Evans LE, Alhazzani W, et al. Surviving Sepsis Campaign: International  
489 Guidelines for Management of Sepsis and Septic Shock 2016. *Crit Care Med*  
490 2017;45(3):486-552. doi: 10.1097/ccm.0000000000002255
- 491 3 WHO. WHO Sepsis Technical Expert Meeting - Meeting report Geneva:  
492 World Health Organization; 2018  
493 [Available from: [https://www.who.int/service-delivery/safety/areas/sepsis\\_meeting-report-](https://www.who.int/service-delivery/safety/areas/sepsis_meeting-report-2018.pdf)  
494 [2018.pdf](https://www.who.int/service-delivery/safety/areas/sepsis_meeting-report-2018.pdf) accessed 25 November 2019 2019].
- 495 4 Vincent J-L. The Clinical Challenge of Sepsis Identification and Monitoring. *PLoS Med*  
496 2016;13(5):e1002022. doi: 10.1371/journal.pmed.1002022
- 497 5 Rudd KE, Johnson SC, Agesa KM, et al. Global, regional, and national sepsis incidence  
498 and mortality, 1990&#x2013;2017: analysis for the Global Burden of Disease Study. *The*  
499 *Lancet* 2020;395(10219):200-11.  
500 doi: 10.1016/S0140-6736(19)32989-7
- 501 6 Reinhart K, Daniels R, Kissoon N, et al. Recognizing Sepsis as a Global Health Priority  
502 — A WHO Resolution. *N Engl J Med* 2017;377(5):414-17.  
503 doi: 10.1056/NEJMp1707170

- 1  
2  
3  
4  
5  
6  
7 504 7 Kwizera A, Baelani I, Mer M, et al. The long sepsis journey in low- and middle-income  
8 countries begins with a first step...but on which road? *Crit Care* 2018;22(1):64.  
9 505 doi: 10.1186/s13054-018-1987-z  
10  
11 506  
12  
13 507 8 McGloughlin S, Richards GA, Nor MBM, et al. Sepsis in tropical regions: Report from  
14 the task force on tropical diseases by the World Federation of Societies of Intensive and  
15 508 the task force on tropical diseases by the World Federation of Societies of Intensive and  
16 Critical Care Medicine. *J Crit Care* 2018;46:115-18.  
17  
18 509 doi: 10.1016/j.jcrc.2017.12.018  
19  
20 510  
21  
22 511 9 Becker JU, Theodosis C, Jacob ST, et al. Surviving sepsis in low-income and middle-  
23 income countries: new directions for care and research. *Lancet Infect Dis* 2009;9(9):577-  
24 512 82. doi: 10.1016/S1473-3099(09)70135-5  
25  
26 513  
27  
28 514 10 Schultz MJ, Dunser MW, Dondorp AM, et al. Current challenges in the management of  
29 sepsis in ICUs in resource-poor settings and suggestions for the future.  
30  
31 515  
32  
33 516  
34  
35 517 11 Dellinger RP, Levy MM, Rhodes A, et al. Surviving Sepsis Campaign: international  
36 guidelines for management of severe sepsis and septic shock, 2012.  
37  
38 518  
39  
40 519  
41  
42 520 12 Office of permanent secretatry, Ministry of Public Health, Thailand. The Development of  
43 Health Service Plan and Indicators of Health Outcomes 2018:8.  
44  
45 521  
46  
47 522 13 Ruangchan S, Chusri S, Saengsanga P, et al. Clinical Outcomes of Community-Acquired  
48 Severe Sepsis after Implementation of a Simple Severe Sepsis Fast Track.  
49  
50 523  
51  
52 524  
53  
54  
55  
56  
57  
58  
59  
60

- 1  
2  
3  
4  
5  
6 525 14 Ittisanyakorn M, Ruchichanantakul S, Vanichkulbodee A, et al. Prevalence and factors  
7  
8 associated with one-year mortality of infectious diseases among elderly emergency  
9 526 department patients in a middle-income country. *BMC Infect Dis* 2019;19(1):662.  
10  
11 527 doi: 10.1186/s12879-019-4301-z  
12  
13 528  
14  
15 529 15 Clarke GM, Conti S, Wolters AT, et al. Evaluating the impact of healthcare interventions  
16  
17 using routine data. *BMJ* 2019;365:l2239. doi: 10.1136/bmj.l2239  
18 530  
19  
20 531 16 Hantrakun V, Somayaji R, Teparrukkul P, et al. Clinical epidemiology and outcomes of  
21  
22 community acquired infection and sepsis among hospitalized patients in a resource limited  
23 532 setting in Northeast Thailand: A prospective observational study (Ubon-sepsis). *PLoS One*  
24  
25 533 2018;13(9):e0204509. doi: 10.1371/journal.pone.0204509  
26  
27 534  
28  
29 535 17 Rudd KE, Hantrakun V, Somayaji R, et al. Early management of sepsis in medical patients  
30  
31 in rural Thailand: a single-center prospective observational study.  
32 536 *J Intensive Care* 2019;7:55. doi: 10.1186/s40560-019-0407-z  
33  
34 537  
35  
36 538 18 Seymour CW, Liu VX, Iwashyna TJ, et al. Assessment of Clinical Criteria for Sepsis: For  
37  
38 the Third International Consensus Definitions for Sepsis and Septic Shock (Sepsis-3).  
39 539  
40  
41 540 *Jama* 2016;315(8):762  
42  
43 541 19 Craig P, Cooper C, Gunnell D, et al. Using natural experiments to evaluate population  
44  
45 health interventions: new Medical Research Council guidance.  
46 542  
47 *J Epidemiol Community Health* 2012;66(12):1182-6. doi: 10.1136/jech-2011-200375  
48 543  
49  
50 544 20 Westreich D, Greenland S. The Table 2 Fallacy: Presenting and Interpreting Confounder  
51  
52 and Modifier Coefficients. *Am J Epidemiol* 2013;177(4):292-98.  
53 545  
54  
55 546 doi: 10.1093/aje/kws412  
56  
57  
58  
59  
60

- 1  
2  
3  
4  
5  
6 547 21 Teparrukkul P, Hantrakun V, Imwong M, et al. Utility of qSOFA and modified SOFA in  
7  
8 severe malaria presenting as sepsis. *PLoS One* 2019;14(10):e0223457.  
9 548  
10  
11 549 doi: 10.1371/journal.pone.0223457  
12  
13 550 22 Teparrukkul P, Hantrakun V, Day NPJ, et al. Management and outcomes of severe dengue  
14  
15 patients presenting with sepsis in a tropical country. *PLoS One* 2017;12(4):e0176233. doi:  
16 551  
17 10.1371/journal.pone.0176233  
18 552  
19  
20 553 23 Pierson DJ. Indications for mechanical ventilation in adults with acute respiratory failure.  
21  
22 *Respir Care* 2002;47(3):249-62; discussion 62-5.  
23 554  
24  
25 555 24 Pham T, Brochard LJ, Slutsky AS. Mechanical Ventilation: State of the Art. *Mayo Clin*  
26  
27 *Proc* 2017;92(9):1382-400. doi: 10.1016/j.mayocp.2017.05.004  
28 556  
29  
30 557 25 Jacob ST, Banura P, Baeten JM, et al. The impact of early monitored management on  
31  
32 survival in hospitalized adult Ugandan patients with severe sepsis:  
33  
34 a prospective intervention study\*. *Crit Care Med* 2012;40(7):2050-8.  
35 559  
36 560 doi: 10.1097/CCM.0b013e31824e65d7  
37  
38  
39 561 26 Machado FR, Ferreira EM, Schippers P, et al. Implementation of sepsis bundles in public  
40  
41 hospitals in Brazil: a prospective study with heterogeneous results. *Crit Care*  
42  
43 2017;21(1):268. doi: 10.1186/s13054-017-1858-z  
44 563  
45  
46 564 27 Noritomi DT, Ranzani OT, Monteiro MB, et al. Implementation of a multifaceted sepsis  
47  
48 education program in an emerging country setting: clinical outcomes and cost-  
49  
50 effectiveness in a long-term follow-up study. *Intensive Care Med* 2014;40(2):182-91. doi:  
51 566  
52 10.1007/s00134-013-3131-5  
53 567  
54  
55  
56  
57  
58  
59  
60

- 1  
2  
3  
4  
5  
6 568 28 Sazawal S, Black RE, Pneumonia Case Management Trials G. Effect of pneumonia case  
7  
8 management on mortality in neonates, infants, and preschool children:  
9 569 a meta-analysis of community-based trials. *Lancet Infect Dis* 2003;3(9):547-56.  
10  
11 570  
12  
13 571 doi: 10.1016/s1473-3099(03)00737-0  
14  
15 572 29 Maitland K, Kiguli S, Opoka RO, et al. Mortality after fluid bolus in African children  
16  
17 with severe infection. *N Engl J Med* 2011;364(26):2483-95.  
18 573  
19  
20 574 doi: 10.1056/NEJMoa1101549  
21  
22 575 30 Andrews B, Semler MW, Muchemwa L, et al. Effect of an Early Resuscitation Protocol  
23  
24 on In-hospital Mortality Among Adults With Sepsis and Hypotension: A Randomized  
25 576  
26 Clinical Trial. *JAMA* 2017;318(13):1233-40.  
27 577  
28  
29 578 doi: 10.1001/jama.2017.10913  
30  
31  
32 579  
33  
34 580  
35  
36 581  
37  
38  
39  
40  
41  
42  
43  
44  
45  
46  
47  
48  
49  
50  
51  
52  
53  
54  
55  
56  
57  
58  
59  
60



1  
2  
3  
4  
5  
6 582 **Figure legends**

7  
8  
9 583 **Figure 1| Flow of participants through study**

10  
11 584 **Footnote of figure 1:** This study used the data of an observational study on sepsis patients (Ubon-  
12  
13 585 sepsis) from March 2013 to January 2017 to evaluate the effectiveness of a Sepsis Fast Track  
14  
15 586 (SFT) programme implemented at the study hospital in January 2015  
16  
17  
18 587

19  
20  
21  
22  
23  
24  
25  
26  
27  
28  
29  
30  
31  
32  
33  
34  
35  
36  
37  
38  
39  
40  
41  
42  
43  
44  
45  
46  
47  
48  
49  
50  
51  
52  
53  
54  
55  
56  
57  
58  
59  
60

For peer review only

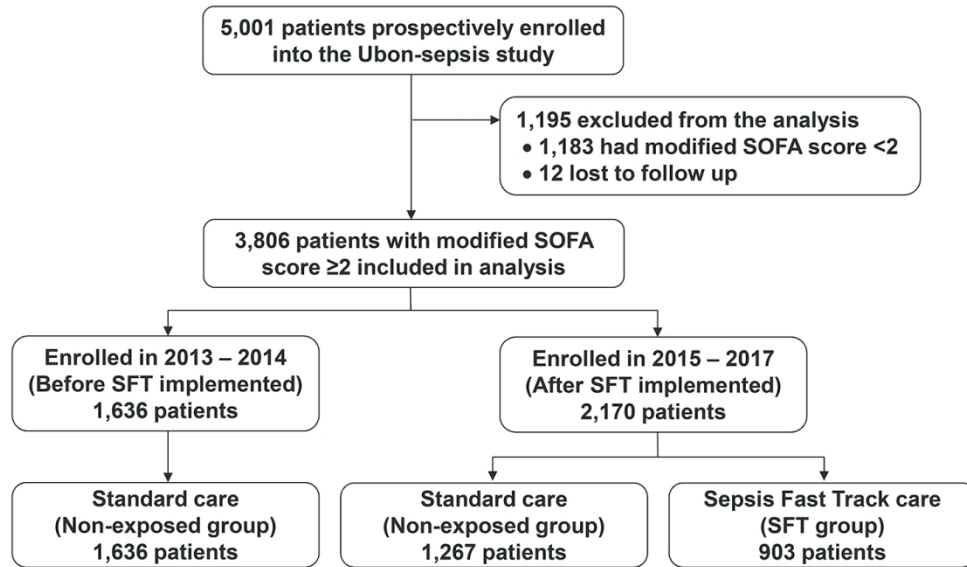

Figure 1 | Flow of participants through study



24 **Supplementary Table 1 | Criteria used to systematically enroll patents into Sepsis Fast Track**  
25 **(SFT) upon admission**

26 **1. Present with 2 or more of below Signs of systemic inflammatory response syndrome**  
27 **(SIRS)**

- 28 • Body temperature > 38.3 °C or < 36.0 °C
- 29 • Heart rate > 90 bpm
- 30 • Respiratory rate > 20 pm or PaCO<sub>2</sub> < 32 mmHg
- 31 • WBC > 12,000 /μL or < 4,000 /μL or Band forms > 10%

32 **2. Suspected sources of infection**

- 33 • Pneumonia
- 34 • Urinary track infection
- 35 • Intra-abdominal infection
- 36 • Skin and soft tissue infection
- 37 • CNS infection
- 38 • Others infections or unspecified source of infection

39 **3. Diagnostic criteria for severe sepsis:** patient met criteria in no 1 and 2 and has at least  
40 one of the following criteria

- 41 • Mottled skin
- 42 • Capillary refilling time ≥ 3 seconds
- 43 • Urine output < 0.5 ml/kg/hour
- 44 • Abrupt change in mental status
- 45 • Acute respiratory failure
- 46 • Platelet count < 100,000 /μL
- 47 • Disseminated intravascular coagulation
- 48 • Lactate > 2 mmol/L
- 49 • SBP < 90 mmHg or MAP < 65 mmHg

50 **4. Diagnostic criteria for septic shock:** patient who are severe sepsis and has at least 1 of  
51 the following criteria

- 52 • SBP < 90 mmHg or MAP < 65 mmHg after crystalliod administration ≥ 40-60  
53 ml/kg of body weight OR after colloid administration ≥ 20-30 ml/kg of body weight
- 54 • Require administration of dopamine > 5μg/kg of BW/min or norepinephrine /  
55 epinephrine > 0.02 μg/kg of BW/min to maintain MAP to be > 65 mmHg

1  
2  
3 57 **Supplementary Table 2 | Systemic manifestation of infection criteria used for enrollment in**

4  
5 58 **Ubon-Sepsis Cohort**

6  
7  
8 59 **General parameters**

- 9 60 1. Fever or hypothermia (Core body temperature defined as  $> 38.3$  °C or  $< 36.0$  °C)
- 10 61 2. Tachycardia (heart rate  $> 90$  beats per minute)
- 11 62 3. Tachypnea (respiratory rate  $> 20$  per minute)
- 12 63 4. Altered mental status with Glasgow Coma Score (GCS)  $< 15$  or  $< 10$  if intubated
- 13 64 5. Hyperglycemia (plasma glucose  $> 140$  mg/dL) in the absence of diabetes

14 65 **Inflammatory parameters**

- 15 66 6. Leukocytosis (white blood cell count  $> 12,000/\mu\text{L}$ ), leukopenia (white blood cell count  $< 4000/\mu\text{L}$ ) or immature forms  $> 10\%$
- 16 67
- 17 68 7. Plasma C-reactive protein  $> 2$  SD above the normal value
- 18 69 8. Plasma procalcitonin  $> 2$  SD above the normal value

19 70 **Hemodynamic parameters**

- 20 71 9. Arterial hypotension (systolic blood pressure (SBP)  $< 90$  mmHg, mean arterial pressure (MAP)  $< 70$  mmHg, or SBP decrease  $> 40$  mmHg)

21 72 **Organ dysfunction parameters**

- 22 73 10. Low oxygen saturation determined by pulse oximetry ( $\text{SpO}_2 < 95\%$ ) determined by pulse oximetry
- 23 74
- 24 75 11. Arterial hypoxemia ( $\text{PaO}_2 / \text{FIO}_2 < 300$ )
- 25 76
- 26 77 12. Acute oliguria (urine output  $< 0.5$  mL/kg/hr or  $45$  mmol/L for 2 hours)
- 27 78
- 28 79 13. Creatinine increase  $> 0.5$  mg/dL
- 29 80
- 30 81 14. Coagulation abnormalities (international normalised ratio  $> 1.5$  or activated partial thromboplastin time  $> 60$  seconds)
- 31 82
- 32 83 15. Thrombocytopenia (Platelet count  $< 100,000$  cells/ $\mu\text{L}$ )
- 33 84
- 34 85 16. Ileus (absent bowel sounds)
- 35 86
- 36 87 17. Hyperbilirubinaemia (plasma total bilirubin  $> 4$  mg/dL)

37 88 **Tissue perfusion parameters**

- 38 89 18. Hyperlactatemia ( $> 1$  mmol/L)
- 39 90
- 40 91 19. Decreased capillary refill or mottling
- 41 92
- 42 93 20. Significant edema or positive fluid balance
- 43
- 44
- 45
- 46
- 47
- 48
- 49
- 50
- 51
- 52
- 53
- 54
- 55
- 56
- 57
- 58
- 59
- 60

89 **Supplementary Table 3| Factors associated with 28-day mortality using multivariable Cox**  
 90 **proportional hazards model without a variable of the direct admission to the ICU**

| Variables                                              | Died<br>(n=779) | Survived<br>(n=3027) | Adjusted hazard ratio<br>(95%CI) | P value |
|--------------------------------------------------------|-----------------|----------------------|----------------------------------|---------|
| <b>SFT group<sup>1</sup></b>                           | 205 (26%)       | 698 (23%)            | 0.77 (0.63- 0.94)                | 0.01    |
| <b>Male gender</b>                                     | 445 (57%)       | 698 (23%)            | 0.86 (0.74- 1.00)                | 0.05    |
| <b>Age group (years) (n [%])</b>                       |                 |                      |                                  |         |
| • 18-40                                                | 59 (8%)         | 688 (23%)            | 1                                | <0.001  |
| • >40-60                                               | 222 (29%)       | 930 (31%)            | 1.69 (1.26- 2.26)                |         |
| • >60-70                                               | 159 (20%)       | 568 (19%)            | 2.07 (1.52- 2.81)                |         |
| • >70                                                  | 339 (44%)       | 841 (28%)            | 3.32 (2.50- 4.41)                |         |
| <b>Transferred from other hospital</b>                 | 715 (92%)       | 2595 (86%)           | 1.16 (0.89- 1.52)                | 0.26    |
| <b>Modified SOFA score (median, IQR)</b>               | 6 (4-9)         | 4 (3-6)              | 1.25 (1.22- 1.27)                | <0.001  |
| <b>Comorbidities</b>                                   |                 |                      |                                  |         |
| • Diabetes mellitus                                    | 205 (26%)       | 602 (20%)            | 1.08 (0.91- 1.27)                | 0.39    |
| • Chronic kidney disease                               | 141 (18%)       | 379 (13%)            | 1.20 (0.99- 1.45)                | 0.07    |
| • Liver disease                                        | 39 (5%)         | 85 (3%)              | 1.24 (0.89- 1.72)                | 0.20    |
| • Malignancy                                           | 24 (3%)         | 36 (1%)              | 2.52 (1.67- 3.81)                | <0.001  |
| <b>Blood culture positive for pathogenic organisms</b> | 190 (24%)       | 332 (11%)            | 1.83 (1.54- 2.16)                | <0.001  |
| <b>Year</b>                                            |                 |                      |                                  |         |
| • 2013                                                 | 165 (21%)       | 637 (21%)            | 1                                | 0.34    |
| • 2014                                                 | 183 (23%)       | 651 (22%)            | 0.98 (0.79- 1.21)                |         |
| • 2015                                                 | 207 (27%)       | 808 (27%)            | 1.01 (0.81- 1.26)                |         |
| • 2016 <sup>2</sup>                                    | 224 (29%)       | 931 (31%)            | 0.85 (0.68- 1.07)                |         |

91 <sup>1</sup> Enrolled in the Sepsis Fast Track (SFT) programme

92 <sup>2</sup> Included 28 patients in 2017

93 **Supplementary Table 4 | Clinical management within the first day of hospital**

| Clinical management <sup>1</sup> | SFT group<br>(n=903) | Control group<br>(n=2903) | Adjusted odds ratio<br>(95% CI) | P value |
|----------------------------------|----------------------|---------------------------|---------------------------------|---------|
| <b>Antibiotic</b>                | 897 (99%)            | 2497 (86%)                | 14.10 (6.10-32.60)              | <0.001  |
| <b>Blood culture</b>             | 829 (92%)            | 2387 (82%)                | 1.77 (1.31-2.38)                | <0.001  |
| <b>Urinary catheterization</b>   | 862 (95%)            | 1642 (57%)                | 11.04 (7.71-15.80)              | <0.001  |
| <b>Acute dialysis</b>            | 10 (1.1%)            | 23 (0.8%)                 | 2.08 (0.69-6.25)                | 0.19    |
| <b>Adrenergic agent</b>          | 706 (78%)            | 902 (31%)                 | 11.25 (8.86-14.28)              | <0.001  |
| <b>Mechanical ventilation</b>    | 290 (32%)            | 840 (29%)                 | 0.30 (0.24-0.38)                | <0.001  |

94 <sup>1</sup>The effect of SFT on each clinical management were estimated by using the multivariable logistic regression  
 95 models adjusted for admission year, gender, age, comorbidities, modified SOFA score, transfer from other hospital,  
 96 blood culture positive for pathogenic organisms, and direct admission to the ICU.

97 **Supplementary Table 5 | Baseline characteristics of sepsis patients included in the Sepsis Fast**  
 98 **Track (SFT) programme or standard of care (control) after the implementation of SFT**  
 99 **programme. Values are number (percentages) unless stated otherwise**

| Characteristics                                          | SFT group <sup>2</sup><br>(n=903) | Non-exposed<br>group <sup>3</sup><br>(n=1267) | P value |
|----------------------------------------------------------|-----------------------------------|-----------------------------------------------|---------|
| <b>Male gender</b>                                       | 526 (58%)                         | 720 (57%)                                     | 0.54    |
| <b>Age (years) (median [IQR])</b>                        | 63 (49-74)                        | 59 (41-73)                                    | <0.001  |
| <b>Age group (years) (n [%])</b>                         |                                   |                                               |         |
| 18-40                                                    | 100 (11%)                         | 293 (23%)                                     | <0.001  |
| >40-60                                                   | 277 (31%)                         | 350 (28%)                                     |         |
| >60-70                                                   | 214 (24%)                         | 230 (18%)                                     |         |
| >70                                                      | 312 (35%)                         | 394 (31%)                                     |         |
| <b>Comorbidities</b>                                     | 486 (54%)                         | 666 (53%)                                     | 0.56    |
| Hypertension                                             | 239 (26%)                         | 349 (28%)                                     | 0.58    |
| Diabetes mellitus                                        | 213 (24%)                         | 286 (23%)                                     | 0.58    |
| Chronic kidney disease                                   | 129 (14%)                         | 197 (16%)                                     | 0.42    |
| Dyslipidemia                                             | 66 (7%)                           | 80 (6%)                                       | 0.36    |
| Heart disease                                            | 48 (5%)                           | 98 (8%)                                       | 0.03    |
| Lung disease                                             | 67 (7%)                           | 126 (10%)                                     | 0.04    |
| Liver disease                                            | 33 (4%)                           | 46 (4%)                                       | 0.98    |
| Cerebrovascular disease                                  | 29 (3%)                           | 25 (2%)                                       | 0.07    |
| Malignancy                                               | 13 (1%)                           | 33 (3%)                                       | 0.06    |
| Human immunodeficiency virus (HIV)                       | 6 (1%)                            | 9 (1%)                                        | 0.90    |
| <b>Organ dysfunction<sup>4</sup></b>                     |                                   |                                               |         |
| Total modified SOFA score (median [IQR])                 | 6 (4-9)                           | 4 (3-6)                                       | <0.001  |
| Renal dysfunction <sup>4</sup>                           | 706 (78%)                         | 743 (59%)                                     | <0.001  |
| Cardiovascular dysfunction <sup>4</sup>                  | 811 (90%)                         | 546 (43%)                                     | <0.001  |
| Coagulation dysfunction <sup>4</sup>                     | 419 (46%)                         | 650 (51%)                                     | 0.03    |
| Liver dysfunction <sup>4</sup>                           | 311 (34%)                         | 318 (25%)                                     | <0.001  |
| Respiratory dysfunction <sup>4</sup>                     | 337 (37%)                         | 400 (32%)                                     | 0.01    |
| Central nervous system dysfunction <sup>4</sup>          | 166 (18%)                         | 217 (17%)                                     | 0.61    |
| <b>Transferred from other hospitals</b>                  | 878 (97%)                         | 1041 (82%)                                    | <0.001  |
| <b>Duration of symptoms<br/>(median [IQR])</b>           | 2 (1-3)                           | 3 (1-5)                                       | <0.001  |
| ≤ 2 days                                                 | 505 (56%)                         | 537 (42%)                                     | <0.001  |
| 3-7 days                                                 | 362 (40%)                         | 650 (51%)                                     |         |
| > 7 days                                                 | 36 (4%)                           | 80 (6%)                                       |         |
| <b>Presenting clinical syndromes<sup>5</sup> (n [%])</b> |                                   |                                               |         |
| Septic shock                                             | 687 (76%)                         | 179 (14%)                                     | <0.001  |



| Characteristics                                        | SFT group <sup>2</sup><br>(n=903) | Non-exposed<br>group <sup>3</sup><br>(n=1267) | P value |
|--------------------------------------------------------|-----------------------------------|-----------------------------------------------|---------|
| Acute febrile illness                                  | 206 (23%)                         | 485 (38%)                                     | <0.001  |
| Lower respiratory infection                            | 223 (25%)                         | 457 (36%)                                     | <0.001  |
| Sepsis                                                 | 225 (25%)                         | 137 (11%)                                     | <0.001  |
| Others                                                 | 13 (1%)                           | 168 (13%)                                     | <0.001  |
| Diarrheal illness                                      | 150 (17%)                         | 105 (8%)                                      | <0.001  |
| <b>Admitted directly to an ICU upon admission</b>      | 170 (19%)                         | 39 (3%)                                       | <0.001  |
| <b>Blood culture positive for pathogenic organisms</b> | 175 (19%)                         | 160 (13%)                                     | <0.001  |
| <b>Year</b>                                            |                                   |                                               |         |
| 2015                                                   | 356 (39%)                         | 659 (52%)                                     | <0.001  |
| 2016                                                   | 535 (59%)                         | 592 (47%)                                     |         |
| 2017                                                   | 12 (1%)                           | 16 (1%)                                       |         |

<sup>1</sup>Organ dysfunction is defined by modified SOFA  $\geq 2$

<sup>2</sup>Sepsis patients who were identified and treated in Sepsis-FT system in 2015 – January 2017.

<sup>3</sup>Sepsis patients whom were not in Sepsis-FT system.

<sup>4</sup>Organ dysfunction defined as modified SOFA score was  $\geq 1$  for each organ system.

<sup>5</sup>Patients may have more than one presenting clinical syndrome.

105 **Supplementary Table 6 | Factors associated with 28-day mortality using multivariable Cox**  
 106 **proportional hazards model in 2,170 patients enrolled into the study after the**  
 107 **implementation of the Sepsis Fast Track (SFT) programme**

| Variables                                              | Died<br>(n=431) | Survived<br>(n=1739) | Adjusted hazard ratio<br>(95%CI) | P value |
|--------------------------------------------------------|-----------------|----------------------|----------------------------------|---------|
| <b>SFT group</b>                                       | 205(48%)        | 698(40%)             | 0.68 (0.55- 0.84)                | <0.001  |
| <b>Male gender</b>                                     | 254(59%)        | 992(57%)             | 0.89 (0.73- 1.09)                | 0.26    |
| <b>Age group (years) (n [%])</b>                       |                 |                      |                                  |         |
| • 18-40                                                | 30(7%)          | 363(21%)             | 1                                | <0.001  |
| • >40-60                                               | 125(29%)        | 502(29%)             | 1.97 (1.31- 2.95)                |         |
| • >60-70                                               | 85(20%)         | 359(21%)             | 1.97 (1.28- 3.03)                |         |
| • >70                                                  | 191(44%)        | 515(30%)             | 3.33 (2.24- 4.95)                |         |
| <b>Transferred from other hospital</b>                 | 406(94%)        | 1513(87%)            | 1.49 (0.99- 2.26)                | 0.06    |
| <b>Modified SOFA score (median, IQR)</b>               | 7 (5-10)        | 4 (3-6)              | 1.24 (1.21- 1.28)                | <0.001  |
| <b>Comorbidities</b>                                   |                 |                      |                                  |         |
| • Diabetes mellitus                                    | 122(28%)        | 377(22%)             | 1.08 (0.87- 1.35)                | 0.49    |
| • Chronic kidney disease                               | 84(19%)         | 242(14%)             | 1.23 (0.96- 1.58)                | 0.11    |
| • Liver disease                                        | 22(5%)          | 57(3%)               | 1.10 (0.71- 1.70)                | 0.68    |
| • Malignancy                                           | 19(4%)          | 27(2%)               | 2.90 (1.81- 4.63)                | <0.001  |
| <b>Blood culture positive for pathogenic organisms</b> | 110(26%)        | 225(13%)             | 1.64 (1.31- 2.05)                | <0.001  |
| <b>Year</b>                                            |                 |                      |                                  |         |
| • 2015                                                 | 207(48%)        | 808(46%)             | 1                                | 0.08    |
| • 2016                                                 | 224(52%)        | 931(54%)             | 0.84 (0.69- 1.02)                |         |
| <b>Direct admission to the ICU</b>                     | 85(20%)         | 124(7%)              | 1.78 (1.37- 2.32)                | <0.001  |

108

109

110 **Supplementary Figure 1 | Preprinted recommended doctor orders for sepsis fast track**  
 111 **programme used at the Emergency Department at Sunpasitthiprasong Hopsital from 1**  
 112 **January 2015**

**SAPPASITTIPRASONG HOSPITAL** ๖๗.6/3

**DOCTOR'S ORDER SHEET** (Rev. 2: พ.ศ. 48)

| FFM                                        | PROGRESS NOTE                                                                                                                                                                                                                                                                                                                                                                                                                                                                                                        | Date<br>Time | ORDER FOR ONE DAY                                                                                                                                                                                                                                                                                                                                                                                                                                                                                                                                                      | Date<br>Time | CONTINUOUS ORDER                                                                                                                                                                                                                          | Date of<br>Sign |
|--------------------------------------------|----------------------------------------------------------------------------------------------------------------------------------------------------------------------------------------------------------------------------------------------------------------------------------------------------------------------------------------------------------------------------------------------------------------------------------------------------------------------------------------------------------------------|--------------|------------------------------------------------------------------------------------------------------------------------------------------------------------------------------------------------------------------------------------------------------------------------------------------------------------------------------------------------------------------------------------------------------------------------------------------------------------------------------------------------------------------------------------------------------------------------|--------------|-------------------------------------------------------------------------------------------------------------------------------------------------------------------------------------------------------------------------------------------|-----------------|
| HN.....<br>ชื่อ-สกุล.....<br>หมู่บ้าน..... | <b>ER NON TRAUMA</b><br><br>Time onset .....<br>Date .....<br>Time .....<br>Onset .....<br><br>Date .....<br>Time .....<br>E V M .....<br>BP / .....<br>HR T C .....                                                                                                                                                                                                                                                                                                                                                 |              | Dx. <input type="checkbox"/> Sepsis <input type="checkbox"/> Severe Sepsis <input type="checkbox"/> Septic Shock<br><br>- Consult ICU Admit.....<br>- CxR .....<br>- EKG.....<br>- DTX. Stat.....<br>- Serum lactate .....<br>- CBC, PT, PTT, U/A .....<br>- BUN, Cr., E'lyte .....<br>- Liver Function Test,alb .....<br>- HC x II stat at ER.....M.<br>- HC x II at รพพ.....M.<br>- V/S q 1 hr. x II then as usual<br>- on O2 canular 3 LPM if O2 sat < 95 %<br>- Retained Foley's cath<br>- NSS1,000 ml IV load.....in 10 min<br>then IV drip ..... ml/hr (30ml/kg) |              | - NPO<br>- Record V/S, N/S, I/O<br><br>Medication<br>ชัก Hx เพื่อยา <input type="checkbox"/> ไม่มี<br><input type="checkbox"/> มี.....<br>ตรวจสอบ Hx เพื่อยา ในHOMC<br><input type="checkbox"/> ไม่มี<br><input type="checkbox"/> มี..... |                 |
|                                            | Source of infection<br><input type="checkbox"/> Respiratory <input type="checkbox"/> GI<br><input type="checkbox"/> Skin, soft tissue <input type="checkbox"/> CNS<br><br><input type="checkbox"/> Cardiovascular<br><input type="checkbox"/> Others.....<br>Systemic infection<br><input type="checkbox"/> Leptospirosis <input type="checkbox"/> Malaria<br><input type="checkbox"/> Rickettsia <input type="checkbox"/> Denque<br><br>พ้อง IV bolus.....ml<br>BP / HR .....<br>IVF รพพ.....ml<br>IVF at ER.....ml |              | - Levophed..... IV drip ..... ml/hr<br>- Dopamine..... IV drip ..... ml/hr<br><input type="checkbox"/> Ceftriaxone 2 gm IV stat .....M.<br><input type="checkbox"/> Cefazidime 2 gm IV stat .....M.<br><input type="checkbox"/> Cloxacilin 2 gm IV stat .....M.<br><input type="checkbox"/> Metronidazole 500 mg IV stat .....M.<br><input type="checkbox"/> Gentamicin 240 mg IV stat .....M.<br>- Notify แพทย์เวร<br><br>นพ. ชัยพร                                                                                                                                   |              |                                                                                                                                                                                                                                           |                 |

113

114 **Supplementary Figure 2 | The Sepsis Fast Track sepsis resuscitation workflow used at the**  
 115 **Emergency Department at Sunpasitthiprasong Hopsital from 1 March 2016**

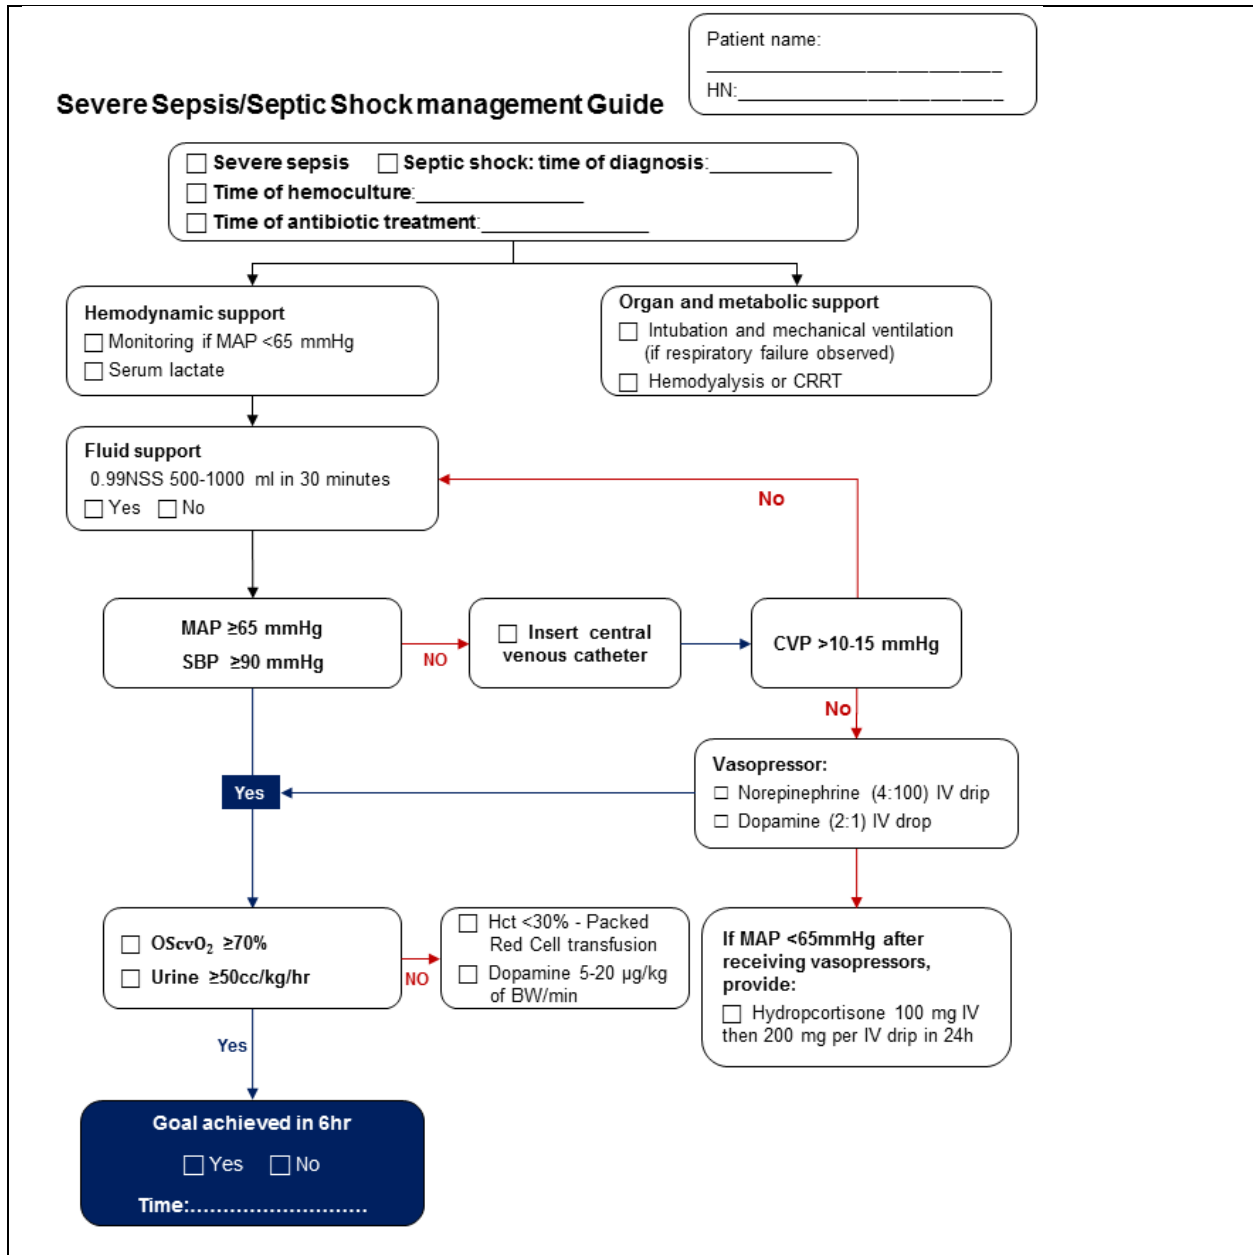

116

117

**STROBE Statement**

## Checklist of items that should be included in reports of observational studies

1  
2  
3  
4  
5  
6  
7  
8  
9  
10  
11  
12  
13  
14  
15  
16  
17  
18  
19  
20  
21  
22  
23  
24  
25  
26  
27  
28  
29  
30  
31  
32  
33  
34  
35  
36  
37  
38  
39  
40  
41  
42  
43  
44  
45  
46  
47

| Section/Topic                                                                                      | Item No | Recommendation                                                                                                                                                                             | Reported on Page No |
|----------------------------------------------------------------------------------------------------|---------|--------------------------------------------------------------------------------------------------------------------------------------------------------------------------------------------|---------------------|
| <b>Title and abstract</b>                                                                          | 1       | (a) Indicate the study's design with a commonly used term in the title or the abstract                                                                                                     | 1, 3                |
|                                                                                                    |         | (b) Provide in the abstract an informative and balanced summary of what was done and what was found                                                                                        | 3-4                 |
| <b>Introduction</b>                                                                                |         |                                                                                                                                                                                            |                     |
| Background/rationale                                                                               | 2       | Explain the scientific background and rationale for the investigation being reported                                                                                                       | 5                   |
| Objectives                                                                                         | 3       | State specific objectives, including any prespecified hypotheses                                                                                                                           | 6                   |
| <b>Methods</b>                                                                                     |         |                                                                                                                                                                                            |                     |
| Study design                                                                                       | 4       | Present key elements of study design early in the paper                                                                                                                                    | 6                   |
| Setting                                                                                            | 5       | Describe the setting, locations, and relevant dates, including periods of recruitment, exposure, follow-up, and data collection                                                            | 6                   |
| Participants                                                                                       | 6       | (a) <i>Cohort study</i> —Give the eligibility criteria, and the sources and methods of selection of participants. Describe methods of follow-up                                            | 7-8                 |
|                                                                                                    |         | <i>Case-control study</i> —Give the eligibility criteria, and the sources and methods of case ascertainment and control selection. Give the rationale for the choice of cases and controls |                     |
|                                                                                                    |         | <i>Cross-sectional study</i> —Give the eligibility criteria, and the sources and methods of selection of participants                                                                      |                     |
| Variables                                                                                          | 7       | (b) <i>Cohort study</i> —For matched studies, give matching criteria and number of exposed and unexposed                                                                                   | 8-9                 |
|                                                                                                    |         | <i>Case-control study</i> —For matched studies, give matching criteria and the number of controls per case                                                                                 |                     |
| Data sources/measurement                                                                           | 8*      | Clearly define all outcomes, exposures, predictors, potential confounders, and effect modifiers. Give diagnostic criteria, if applicable                                                   | 8-9                 |
| Bias                                                                                               | 9       | For each variable of interest, give sources of data and details of methods of assessment (measurement). Describe comparability of assessment methods if there is more than one group       | 8-9                 |
| Study size                                                                                         | 10      | Describe any efforts to address potential sources of bias                                                                                                                                  | 11-12               |
| Quantitative variables                                                                             | 11      | Explain how the study size was arrived at                                                                                                                                                  | 10                  |
| Statistical methods                                                                                | 12      | Explain how quantitative variables were handled in the analyses. If applicable, describe which groupings were chosen and why                                                               | 11-12               |
|                                                                                                    |         | (a) Describe all statistical methods, including those used to control for confounding                                                                                                      | 11-12               |
|                                                                                                    |         | (b) Describe any methods used to examine subgroups and interactions                                                                                                                        | 11-12               |
|                                                                                                    |         | (c) Explain how missing data were addressed                                                                                                                                                | 8                   |
|                                                                                                    |         | (d) <i>Cohort study</i> —If applicable, explain how loss to follow-up was addressed                                                                                                        | 6                   |
| <i>Case-control study</i> —If applicable, explain how matching of cases and controls was addressed |         |                                                                                                                                                                                            |                     |
|                                                                                                    |         | <i>Cross-sectional study</i> —If applicable, describe analytical methods taking account of sampling strategy                                                                               | 12                  |
|                                                                                                    |         | (e) Describe any sensitivity analyses                                                                                                                                                      | 12                  |

| Section/Topic            | Item No | Recommendation                                                                                                                                                                                               | Reported on Page No |
|--------------------------|---------|--------------------------------------------------------------------------------------------------------------------------------------------------------------------------------------------------------------|---------------------|
| <b>Results</b>           |         |                                                                                                                                                                                                              |                     |
| Participants             | 13*     | (a) Report numbers of individuals at each stage of study—eg numbers potentially eligible, examined for eligibility, confirmed eligible, included in the study, completing follow-up, and analysed            | 13                  |
|                          |         | (b) Give reasons for non-participation at each stage                                                                                                                                                         |                     |
|                          |         | (c) Consider use of a flow diagram                                                                                                                                                                           |                     |
| Descriptive data         | 14*     | (a) Give characteristics of study participants (eg demographic, clinical, social) and information on exposures and potential confounders                                                                     | 13-14               |
|                          |         | (b) Indicate number of participants with missing data for each variable of interest                                                                                                                          |                     |
|                          |         | (c) <i>Cohort study</i> —Summarise follow-up time (eg, average and total amount)                                                                                                                             |                     |
| Outcome data             | 15*     | <i>Cohort study</i> —Report numbers of outcome events or summary measures over time                                                                                                                          | 15-16               |
|                          |         | <i>Case-control study</i> —Report numbers in each exposure category, or summary measures of exposure                                                                                                         |                     |
|                          |         | <i>Cross-sectional study</i> —Report numbers of outcome events or summary measures                                                                                                                           |                     |
| Main results             | 16      | (a) Give unadjusted estimates and, if applicable, confounder-adjusted estimates and their precision (eg, 95% confidence interval). Make clear which confounders were adjusted for and why they were included | 14-16               |
|                          |         | (b) Report category boundaries when continuous variables were categorized                                                                                                                                    |                     |
|                          |         | (c) If relevant, consider translating estimates of relative risk into absolute risk for a meaningful time period                                                                                             |                     |
| Other analyses           | 17      | Report other analyses done—eg analyses of subgroups and interactions, and sensitivity analyses                                                                                                               | 17-19               |
| <b>Discussion</b>        |         |                                                                                                                                                                                                              |                     |
| Key results              | 18      | Summarise key results with reference to study objectives                                                                                                                                                     | 19-21               |
| Limitations              | 19      | Discuss limitations of the study, taking into account sources of potential bias or imprecision. Discuss both direction and magnitude of any potential bias                                                   | 22                  |
| Interpretation           | 20      | Give a cautious overall interpretation of results considering objectives, limitations, multiplicity of analyses, results from similar studies, and other relevant evidence                                   | 21-23               |
| Generalisability         | 21      | Discuss the generalisability (external validity) of the study results                                                                                                                                        | 22                  |
| <b>Other Information</b> |         |                                                                                                                                                                                                              |                     |
| Funding                  | 22      | Give the source of funding and the role of the funders for the present study and, if applicable, for the original study on which the present article is based                                                | 24                  |

\*Give information separately for cases and controls in case-control studies and, if applicable, for exposed and unexposed groups in cohort and cross-sectional studies.

**Note:** An Explanation and Elaboration article discusses each checklist item and gives methodological background and published examples of transparent reporting. The STROBE checklist is best used in conjunction with this article (freely available on the Web sites of PLoS Medicine at <http://www.plosmedicine.org/>, Annals of Internal Medicine at <http://www.annals.org/>, and Epidemiology at <http://www.epidem.com/>). Information on the STROBE Initiative is available at [www.strobe-statement.org](http://www.strobe-statement.org).

# BMJ Open

## Effectiveness of a sepsis programme in a resource-limited setting: a retrospective analysis of data of a prospective observational study (Ubon-sepsis)

|                                 |                                                                                                                                                                                                                                                                                                                                                                                                                                                                                                                                                                                                                                                                                                                                                                                                                                                                                                                                                                                                                                                                                                                                                                                                                                                                                                                                                                                                   |
|---------------------------------|---------------------------------------------------------------------------------------------------------------------------------------------------------------------------------------------------------------------------------------------------------------------------------------------------------------------------------------------------------------------------------------------------------------------------------------------------------------------------------------------------------------------------------------------------------------------------------------------------------------------------------------------------------------------------------------------------------------------------------------------------------------------------------------------------------------------------------------------------------------------------------------------------------------------------------------------------------------------------------------------------------------------------------------------------------------------------------------------------------------------------------------------------------------------------------------------------------------------------------------------------------------------------------------------------------------------------------------------------------------------------------------------------|
| Journal:                        | <i>BMJ Open</i>                                                                                                                                                                                                                                                                                                                                                                                                                                                                                                                                                                                                                                                                                                                                                                                                                                                                                                                                                                                                                                                                                                                                                                                                                                                                                                                                                                                   |
| Manuscript ID                   | bmjopen-2020-041022.R2                                                                                                                                                                                                                                                                                                                                                                                                                                                                                                                                                                                                                                                                                                                                                                                                                                                                                                                                                                                                                                                                                                                                                                                                                                                                                                                                                                            |
| Article Type:                   | Original research                                                                                                                                                                                                                                                                                                                                                                                                                                                                                                                                                                                                                                                                                                                                                                                                                                                                                                                                                                                                                                                                                                                                                                                                                                                                                                                                                                                 |
| Date Submitted by the Author:   | 18-Dec-2020                                                                                                                                                                                                                                                                                                                                                                                                                                                                                                                                                                                                                                                                                                                                                                                                                                                                                                                                                                                                                                                                                                                                                                                                                                                                                                                                                                                       |
| Complete List of Authors:       | Booraphun, Suchart; Sunpasithiprasong Hospital, Medical Department Hantrakun, Viriya; Mahidol Oxford Tropical Medicine Research Unit, Microbiology<br>Siriboon, Suwatthiya; Sunpasithiprasong Hospital<br>Boonsri, Chaiyaporn ; Sunpasithiprasong Hospital, Emergency Department<br>Poomthong, Pulyamon; Sunpasithiprasong Hospital<br>Singkaew, Bung-Orn; Sunpasithiprasong Hospital<br>Wasombat, Oratai; Sunpasithiprasong Hospital<br>Chamnan, Parinya; Sunpasithiprasong Hospital<br>Champunot, Ratapum; Buddhachinaraj Phitsanulok Hospital, Department of Internal Medicine<br>Rudd, Kristina; University of Pittsburgh, Department of Critical Care Medicine<br>Day, Nicholas; Mahidol Oxford Tropical Medicine Research Unit; Univerity of Oxford Nuffield Department of Medicine, Centre for Tropical Medicine<br>Dondorp, Arjen; Mahidol Oxford Tropical Medicine Research Unit; Univerity of Oxford Nuffield Department of Medicine, Centre for Tropical Medicine<br>Teparrukkul, Prapit; Sunpasithiprasong Hospital<br>West, Timothy Eoin; University of Washington, Division of Pulmonary, Critical Care, and Sleep Medicine; Mahidol University Faculty of Tropical Medicine, Department of Microbiology and Immunology<br>Limmathurotsakul, Direk; Mahidol Oxford Tropical Medicine Research Unit; Mahidol University Faculty of Tropical Medicine, Department of Tropical Hygiene |
| <b>Primary Subject Heading</b>: | Intensive care                                                                                                                                                                                                                                                                                                                                                                                                                                                                                                                                                                                                                                                                                                                                                                                                                                                                                                                                                                                                                                                                                                                                                                                                                                                                                                                                                                                    |
| Secondary Subject Heading:      | Infectious diseases, Epidemiology                                                                                                                                                                                                                                                                                                                                                                                                                                                                                                                                                                                                                                                                                                                                                                                                                                                                                                                                                                                                                                                                                                                                                                                                                                                                                                                                                                 |
| Keywords:                       | Epidemiology < INFECTIOUS DISEASES, INFECTIOUS DISEASES, INTENSIVE & CRITICAL CARE                                                                                                                                                                                                                                                                                                                                                                                                                                                                                                                                                                                                                                                                                                                                                                                                                                                                                                                                                                                                                                                                                                                                                                                                                                                                                                                |
|                                 |                                                                                                                                                                                                                                                                                                                                                                                                                                                                                                                                                                                                                                                                                                                                                                                                                                                                                                                                                                                                                                                                                                                                                                                                                                                                                                                                                                                                   |

1  
2  
3  
4  
5  
6  
7  
8  
9  
10  
11  
12  
13  
14  
15  
16  
17  
18  
19  
20  
21  
22  
23  
24  
25  
26  
27  
28  
29  
30  
31  
32  
33  
34  
35  
36  
37  
38  
39  
40  
41  
42  
43  
44  
45  
46  
47  
48  
49  
50  
51  
52  
53  
54  
55  
56  
57  
58  
59  
60







I, the Submitting Author has the right to grant and does grant on behalf of all authors of the Work (as defined in the below author licence), an exclusive licence and/or a non-exclusive licence for contributions from authors who are: i) UK Crown employees; ii) where BMJ has agreed a CC-BY licence shall apply, and/or iii) in accordance with the terms applicable for US Federal Government officers or employees acting as part of their official duties; on a worldwide, perpetual, irrevocable, royalty-free basis to BMJ Publishing Group Ltd ("BMJ") its licensees and where the relevant Journal is co-owned by BMJ to the co-owners of the Journal, to publish the Work in this journal and any other BMJ products and to exploit all rights, as set out in our [licence](#).

The Submitting Author accepts and understands that any supply made under these terms is made by BMJ to the Submitting Author unless you are acting as an employee on behalf of your employer or a postgraduate student of an affiliated institution which is paying any applicable article publishing charge ("APC") for Open Access articles. Where the Submitting Author wishes to make the Work available on an Open Access basis (and intends to pay the relevant APC), the terms of reuse of such Open Access shall be governed by a Creative Commons licence – details of these licences and which [Creative Commons](#) licence will apply to this Work are set out in our licence referred to above.

Other than as permitted in any relevant BMJ Author's Self Archiving Policies, I confirm this Work has not been accepted for publication elsewhere, is not being considered for publication elsewhere and does not duplicate material already published. I confirm all authors consent to publication of this Work and authorise the granting of this licence.

1  
2  
3 **1 Effectiveness of a sepsis programme in a resource-limited setting: a retrospective analysis of**  
4 **2 data of a prospective observational study (Ubon-sepsis)**  
5  
6  
7  
8  
9

10 Suchart Booraphun MD<sup>1</sup>, Viriya Hantrakun PhD<sup>2</sup>, Suwatthiya Siriboon MD<sup>1</sup>, Chaiyaporn Boonsri  
11 MD<sup>1</sup>, Pulyamon Poomthong MD<sup>1</sup>, Bung-Orn Singkaew BNS<sup>1</sup>, Oratai Wasombat BNS<sup>1</sup>, Parinya  
12 Chamnan MD, PhD<sup>1</sup>, Ratapum Champunot MD<sup>3</sup>, Kristina Rudd MD, MPH<sup>4,5</sup>, Nicholas P.J. Day<sup>2,6</sup>  
13 MD<sup>2</sup>, PhD, Arjen M. Dondorp MD, PhD<sup>2,6</sup>, Prapit Teparrukkul MD<sup>1</sup>, T. Eoin West MD, MPH<sup>5,7</sup>,  
14 Direk Limmathurotsakul MD, PhD<sup>2,6,8</sup>  
15  
16  
17  
18  
19  
20  
21  
22  
23  
24

25 Short Title: Sepsis Fast Track Thailand  
26  
27  
28

29 <sup>1</sup>Sunpasitthiprasong Hospital, Ubon Ratchathani, Thailand  
30

31 <sup>2</sup>Mahidol Oxford Tropical Medicine Research Unit, Faculty of Tropical Medicine, Mahidol  
32 University, Bangkok, Thailand  
33  
34

35 <sup>3</sup>Department of Internal Medicine, Buddhachinaraj Phitsanulok Hospital, Phitsanulok, Thailand  
36  
37

38 <sup>4</sup>Department of Critical Care Medicine, University of Pittsburgh, Pittsburgh, Pennsylvania, USA  
39  
40

41 <sup>5</sup>Division of Pulmonary, Critical Care, and Sleep Medicine, University of Washington, Seattle,  
42 United States  
43  
44

45 <sup>6</sup>Centre for Tropical Medicine and Global Health, Nuffield Department of Medicine, University  
46 of Oxford, Churchill Hospital, Oxford, United Kingdom  
47  
48

49 <sup>7</sup>Department of Microbiology and Immunology, Faculty of Tropical Medicine, Mahidol  
50 University, Bangkok, Thailand  
51  
52  
53  
54  
55  
56  
57  
58  
59  
60

1  
2  
3 23 <sup>8</sup>Department of Tropical Hygiene, Faculty of Tropical Medicine, Mahidol University, Bangkok,  
4  
5 24 Thailand  
6  
7  
8  
9

10 26 **\*Corresponding author:** Assoc. Prof. Direk Limmathurotsakul, Mahidol-Oxford Tropical  
11  
12 27 Medicines Research Unit, Faculty of Tropical Medicine, Mahidol University, 420/6 Rajvithi Road,  
13  
14 28 Bangkok, 10400, Thailand. Tel: +66 2 203 6333, E-mail: [direk@tropmedres.ac](mailto:direk@tropmedres.ac) (DL)  
15  
16  
17  
18

19 30 **Word count:** abstract 285, text 3,829  
20

21 31 **Number of pages:** 32, Tables: 2; Figures: 1, Supporting Information: 1  
22  
23

24 32 **Keywords:** sepsis, sepsis care, sepsis management, mortality, resource limited setting  
25  
26  
27  
28  
29  
30  
31  
32  
33  
34  
35  
36  
37  
38  
39  
40  
41  
42  
43  
44  
45  
46  
47  
48  
49  
50  
51  
52  
53  
54  
55  
56  
57  
58  
59  
60

1  
2  
3 34 **Abstract**  
4

5 35 **Objective:** To evaluate the effectiveness of a Sepsis Fast Track (SFT) programme initiated at a  
6  
7 regional referral hospital in Thailand in January 2015  
8  
9

10 37 **Design:** A retrospective analysis using the data of a prospective observational study (Ubon-sepsis)  
11  
12 38 from March 2013 to January 2017  
13

14 39 **Setting:** General medical wards and medical intensive care units (ICUs) of a study hospital  
15

16 40 **Participants:** Patients with community-acquired sepsis observed under the Ubon-sepsis cohort.  
17  
18 Sepsis was defined as modified Sequential Organ Failure Assessment (SOFA) score  $\geq 2$ .  
19  
20

21 42 **Main exposure:** The SFT programme was a protocol to identify and initiate sepsis care on hospital  
22  
23 admission, implemented at the study hospital in 2015. Patients in the SFT programme were  
24  
25 admitted directly to the ICUs when available. The non-exposed group comprised of patients who  
26  
27 received standard of care.  
28  
29

30 46 **Main outcome:** The primary outcome was 28-day mortality. The secondary outcomes were  
31  
32 measured sepsis management interventions.  
33  
34

35 48 **Results:** Of 3,806 sepsis patients, 903 (24%) were detected and enrolled in the SFT programme  
36  
37 of the study hospital (SFT group) and 2,903 received standard of care (non-exposed group).  
38  
39 Patients in the SFT group had more organ dysfunction, were more likely to receive measured sepsis  
40  
41 management and to be admitted directly to the ICU (19% vs. 4%). Patients in the SFT group were  
42  
43 more likely to survive (adjusted hazard ratio 0.72; 95% CI 0.58 to 0.88,  $p=0.001$ ) adjusted for  
44  
45 admission year, gender, age, comorbidities, modified SOFA score and direct admission to the  
46  
47  
48  
49 54 ICUs.  
50  
51  
52  
53  
54  
55  
56  
57  
58  
59  
60

1  
2  
3 55 **Conclusions:** The SFT programme is associated with improved sepsis care and lower risk of death  
4  
5 56 in sepsis patients in rural Thailand, where some critical care resources are limited. The survival  
6  
7 57 benefit is observed even when all patients enrolled in the programme could not be admitted directly  
8  
9 58 into the ICUs.

10  
11  
12 59 **Study registration number:** NCT02217592  
13  
14  
15 60

### 18 61 **Strengths and limitations of this study**

- 20 62 • The study hospital utilized the published framework, SCAN-TEACH-TREAT programme  
21  
22 63 to develop a context specific quality of care improvement for sepsis in a tropical resource-  
23  
24 64 limited setting.
- 25  
26  
27 65 • The study took advantage of a robust prospective observational study design that  
28  
29 66 strengthened causal inference by providing pre-intervention information, having an  
30  
31 67 appropriate control group from both pre and post-intervention periods, and controlling  
32  
33 68 important confounding factors (i.e. the modified SOFA score).
- 34  
35  
36 69 • We found that most measured sepsis interventions increased.
- 37  
38  
39 70 • The study did not record dosage of dobutamine, dopamine, epinephrine and  
40  
41 71 norepinephrine, arterial blood gases were rarely performed, and the modified SOFA score  
42  
43 72 (maximum 23) may be lower than the SOFA score (maximum 24).
- 44  
45  
46 73 • The observational study may have residual confounding factors such as improvement of  
47  
48 74 care and profile of organ failure recognition overtimes.
- 49  
50  
51  
52  
53  
54  
55  
56  
57  
58  
59  
60

## 75 INTRODUCTION

76 Sepsis is defined as life-threatening organ dysfunction caused by a dysregulated host response to  
77 infection,<sup>1</sup> and is the primary cause of death from infection, especially if not recognized and treated  
78 promptly.<sup>2-4</sup> Sepsis is a major cause of health loss worldwide and is associated with approximately  
79 eleven million deaths each year, most of which occur in low and middle-income countries  
80 (LMICs).<sup>5</sup> The United Nations World Health Assembly has recognized sepsis as a global health  
81 priority and adopted a resolution on improving its worldwide prevention, diagnosis and  
82 management.<sup>6</sup> Comprehensive guidelines such as those developed by the Surviving Sepsis  
83 Campaign have been associated with reduced mortality in high-income countries,<sup>2-4</sup> but  
84 effectiveness of these guidelines in LMICs needs more evaluation.<sup>7-10</sup>

86 Following the Surviving Sepsis Campaign (SSC) 2012,<sup>11</sup> the Ministry of Public Health Thailand  
87 and the Thai Society of Critical Care Medicine developed local recommendations on sepsis based  
88 on resource availability and local context.<sup>12</sup> The recommendations suggest that secondary-care and  
89 tertiary-care hospitals in the country should develop a Sepsis Fast Track (SFT) so that, on  
90 presentation, sepsis patients can be identified, treated and directly admitted to the ICUs when  
91 available. One small retrospective study showed lower mortality among sepsis patients enrolled  
92 than those not enrolled in the SFT (21% vs. 43%) at the study hospital,<sup>13</sup> while another study did  
93 not find an association between SFT and mortality outcome.<sup>14</sup> These studies were subject to  
94 selection biases due to their retrospective nature.<sup>13-14</sup> Interventional studies to randomize patients  
95 to receive or not receive the SFT, however, would be unethical and impractical after the national  
96 recommendations have been implemented. It is increasingly recommended to evaluate the impact

1  
2  
3 97 of healthcare interventions using routine data, particularly when a wide range of routinely collected  
4  
5 98 data is available.<sup>15</sup>  
6  
7  
8 99

9  
10 100 Here, we analysed data from our prospective observational study of community-acquired sepsis  
11  
12 101 patients presenting to a referral hospital in Thailand over four years (from March 2013 to January  
13  
14 102 2017)<sup>16-17</sup> to retrospectively evaluate the effectiveness of a SFT programme which was  
15  
16  
17 103 implemented at the study hospital in January 2015.  
18  
19  
20 104

## 21 22 105 **MATERIAL AND METHODS**

### 23 24 106 **Study design**

25  
26  
27 107 We conducted a retrospective study to evaluate the effectiveness of the SFT programme by using  
28  
29 108 the data of a prospective observational study (Ubon-sepsis).<sup>16-17</sup> The SFT programme was  
30  
31 109 implemented at the study hospital in January 2015 until now as per national recommendations.<sup>12</sup>  
32  
33 110 The SFT programme at the study hospital included (1) diagnostic criteria for attending physicians  
34  
35 111 and medical teams to systematically identify sepsis patients on hospital admission (Supplementary  
36  
37 112 Table 1), (2) a recommended sepsis care protocol and (3) direct admission to the ICUs when  
38  
39 113 available. The SFT programme at the study hospital was generated by the SFT committee of the  
40  
41 114 study hospital (S.B., S.S., C.B., P.P., B.S., O.W., P.C. and P.T.) based on SSC 2012,<sup>11</sup> resource  
42  
43 115 availability and local context.<sup>12</sup> The study hospital is a referral hospital to smaller district hospitals  
44  
45 116 and provincial hospitals in three adjacent provinces. The referring hospitals were not involved in  
46  
47 117 the SFT programme of the study hospital during the study period.  
48  
49  
50  
51  
52  
53  
54  
55  
56  
57  
58  
59  
60

1  
2  
3 119 Details of the Ubon-sepsis cohort have been published elsewhere.<sup>16-17</sup> In short, the Ubon-sepsis  
4  
5 120 research team, who were not attending physicians or medical teams at the study hospital,  
6  
7  
8 121 conducted a prospective observational study of community-acquired infections and sepsis from  
9  
10 122 March 2013 to January 2017.<sup>16-17</sup> The research team prospectively enrolled adult patients  $\geq 18$   
11  
12 123 years old who were admitted to the general medical wards and medical intensive care units (ICUs)  
13  
14 124 with a primary diagnosis of infection made by the attending physician, were within 24 hours of  
15  
16 125 admission to the study hospital, and had three of 20 systemic manifestations of infection  
17  
18 126 documented in the medical records (Supplementary Table 2). The 20 systemic manifestations of  
19  
20 127 the infections were consolidated from the 22 variables proposed as diagnostic criteria for sepsis  
21  
22 128 for SSC 2012.<sup>11</sup> The study team sequentially screened all medical patients by reviewing admission  
23  
24 129 logs in the emergency department (ED), medical wards, and medical ICUs twice daily (morning  
25  
26 130 and afternoon) on each working day. The Ubon-sepsis cohort was initiated in 2012 prior to the  
27  
28 131 implementation of SFT at the study hospital. The research team was not involved in any clinical  
29  
30 132 interventions; enrollment in the SFT programme and all medical treatment was performed by  
31  
32 133 attending physicians and medical teams. The research team did not adjust the study protocol,  
33  
34 134 inclusion criteria and exclusion criteria of the Ubon-sepsis cohort during the entire study period,  
35  
36 135 and the research team recorded whether participants in the Ubon-sepsis cohort were enrolled in  
37  
38 136 the SFT programme.  
39  
40  
41  
42  
43  
44  
45  
46

47 138 The reporting of this study follows the STROBE guidelines. Written, informed permission was  
48  
49 139 obtained from participants prior to enrollment in the Ubon-sepsis cohort.  
50  
51  
52  
53  
54  
55  
56  
57  
58  
59  
60



## 141 **Participants**

142 For this study, we evaluated patients who were included into the Ubon-sepsis cohort and had  
143 community-acquired sepsis. Sepsis was defined as an infection with organ dysfunction in  
144 accordance with the 2016 international Consensus (Sepsis-3) guidelines for sepsis.<sup>1</sup> Organ  
145 dysfunction was determined by a modified sequential (sepsis-based) organ failure assessment  
146 (SOFA) score  $\geq 2$  as previously described.<sup>16-17</sup> The study was conducted in 2013 prior to the Sepsis-  
147 3 definition, and inotropic and vasopressor agent doses were not recorded into the CRF.<sup>1, 18</sup> For  
148 the cardiovascular component of the SOFA score, the scoring was modified such that subjects  
149 were scored a maximum of 2 (on a 4-point scale) if they received only dobutamine or dopamine,  
150 and scored a maximum of 3 if they received epinephrine or norepinephrine. For the respiratory  
151 component of the SOFA score, as PaO<sub>2</sub>/FiO<sub>2</sub> indices were not available for the majority of  
152 subjects due to infrequency of arterial blood gas tests, the score was modified as follows: Subjects  
153 were scored a maximum of 2 (4-point scale) if they received advanced respiratory support  
154 (endotracheal tube, gas powered or electrical powered mechanical ventilation) and arterial blood  
155 gas test was not performed.<sup>16-17</sup> The Ubon-sepsis cohort excluded patients who were suspected of  
156 having hospital-acquired infections (determined by the attending physician), hospitalized within  
157 30 days prior to the current admission, or hospitalized at any facility for a total duration longer  
158 than 72 hours prior to enrollment.

159

## 160 **Main exposure**

161 Main exposure of the study was the SFT programme. All patients included in the Ubon-sepsis  
162 cohort from March 2013 to December 2014 who received standard care were considered as the

1  
2  
3 163 non-exposed group. Patients included in the Ubon-sepsis cohort from January 2015 to January  
4  
5 164 2017 who received standard care or received care in the SFT programme by attending medical  
6  
7  
8 165 teams using their criteria on admission (Supplementary Table 1) were considered as the additional  
9  
10 166 non-exposed group or as the SFT group, respectively. The Ubon-sepsis research team were not  
11  
12 167 involved in decision-making regarding enrollment to the SFT programme.  
13  
14

15 168  
16  
17 169 Patients in the non-exposed group received standard care according to local guidelines. Patients in  
18  
19 170 the SFT group received the standard of care along with a recommended sepsis care protocol of the  
20  
21 171 SFT programme. First, preprinted recommended doctor orders for the SFT programme were used  
22  
23 172 as of January 2015 (Supplementary Figure 1). The recommended orders included oxygen  
24  
25 173 administration, intravenous fluid loading and fluid administration to achieve the recommended  
26  
27 174 target of 30 mL/kg crystalloid, blood culture, recommended stat (immediate) doses and choices of  
28  
29 175 parenteral antibiotics including ceftriaxone, ceftazidime, cloxacillin, metronidazole and  
30  
31 176 gentamycin, contact ICU for ICU admission (if available), oxygen supplementation, close  
32  
33 177 monitoring of vital signs and urine output, and a set of diagnostic tests including chest radiography,  
34  
35 178 electrocardiogram, rapid blood glucose test, serum lactate, complete blood count, blood urea  
36  
37 179 nitrogen, creatinine, electrolytes, liver function tests, albumin level, prothrombin time and partial  
38  
39 180 thromboplastin time. Second, as of March 2016, the resuscitation workflow to normalize and  
40  
41 181 maintain a mean arterial pressure (MAP)  $\geq 65$  mmHg, systolic blood pressure (SBP)  $\geq 90$  mmHg  
42  
43 182 and urine output  $\geq 0.5$  mL/kg/hr within the first six hours was formally implemented and  
44  
45 183 recommended (Supplementary Figure 2). The resuscitation workflow included fluid resuscitation,  
46  
47 184 measurement of central venous pressure (CVP) and central venous oxygen saturation (SCVO<sub>2</sub>),  
48  
49  
50  
51  
52  
53  
54  
55  
56  
57  
58  
59  
60

1  
2  
3 185 administration of adrenergic agents, blood transfusion for haematocrit <30% and hydrocortisone  
4  
5 186 if adequate fluid resuscitation and vasopressor therapy could not restore hemodynamic stability.  
6  
7  
8 187 The resuscitation workflow was pre-printed and included in the clinical chart of every SFT patient  
9  
10 188 (together with pre-printed doctor's orders), and was recommended even if patients could not be  
11  
12 189 admitted directly to the ICU. A separate set of documents, recommended management and  
13  
14 190 recommended frequency of vital signs monitoring for nurses (i.e. nurse notes for SFT patients)  
15  
16 191 were also used for every SFT patient. Preparation and regular meetings to implement and monitor  
17  
18  
19 192 the SFT programme were organized by the SFT committee of Sunpasitthiprasong Hospital.  
20  
21  
22 193

### 23 24 194 **Outcome measures**

25  
26 195 The primary outcome measure was 28-day mortality as recorded in the Ubon-sepsis cohort.<sup>16</sup> 28-  
27  
28 196 day mortality data were collected via telephone contact if subjects were no longer hospitalized and  
29  
30 197 had been discharged alive.<sup>16</sup> The secondary outcome measures were sepsis management  
31  
32  
33 198 interventions; including antibiotics administration, blood cultures, mechanical ventilation,  
34  
35 199 adrenergic agents, acute haemodialysis and placement of a urinary catheter within the first day of  
36  
37 200 hospitalization.<sup>16-17</sup>  
38  
39

40 201  
41  
42 202 **Sample size**  
43  
44 203 The sample size of the study was determined by the sample size of Ubon-sepsis cohort. We  
45  
46 204 assumed that about 50% of 3,806 sepsis patients in the Ubon-sepsis cohort were enrolled after the  
47  
48 205 implementation of the SFT programme, of which 50% were enrolled in the SFT programme (i.e.  
49  
50 206 952 and 2,854 patients were estimated to be the SFT and non-exposed group, respectively). We  
51  
52  
53  
54  
55  
56  
57  
58  
59  
60

1  
2  
3 207 assumed that the mortality of the non-exposed group was 21% based on published data.<sup>16-17</sup> Our  
4  
5 208 current sample size of 3,806 would provide a power of 80% at an alpha error of 5% to detect a 4%  
6  
7 209 difference in the mortality outcome.  
8  
9

10 210

### 11 211 **Statistical analysis**

12  
13  
14 212 All sepsis patients were included in the analysis regardless of whether they were enrolled before  
15  
16  
17 213 or after the implementation of the SFT programme. We used the Chi-square test and Mann-  
18  
19 214 Whitney test to compare the proportions of binary variables and median of continuous variables  
20  
21 215 between groups, respectively. The interquartile range is presented as 25<sup>th</sup> and 75<sup>th</sup> percentiles.  
22  
23

24 216

25  
26 217 In the primary analysis, we used multivariable Cox proportional hazard models to evaluate the  
27  
28 218 effectiveness of SFT programme on 28-day mortality. The multivariable Cox proportional hazard  
29  
30 219 model was used to adjust the difference between those receiving the SFT programme and the  
31  
32  
33 220 others.<sup>19</sup> To reduce bias in the model development, we used the previous multivariable Cox  
34  
35 221 proportional hazard model as the base model,<sup>16</sup> added the SFT group variable and direct admission  
36  
37 222 to the ICU, and modified by adding a time variable to represent possible changes over time and by  
38  
39 223 using continuous modified SOFA score on admission rather than as a binary variable (modified  
40  
41 224 SOFA score  $\geq 2$ ). Twenty eight patients enrolled in early 2017 were considered as enrolled in  
42  
43  
44 225 2016. The continuous modified SOFA score was used to improve regression adjustment for disease  
45  
46 226 severity of the model. The other variables included in the model were gender, age group, transfer  
47  
48 227 from other hospital, comorbidities (diabetes mellitus, chronic kidney disease, liver disease and  
49  
50 228 malignancy) and blood culture positive for pathogenic organisms. We calculated the unadjusted  
51  
52  
53  
54  
55  
56  
57  
58  
59  
60

1  
2  
3 229 and adjusted probability of survival at each timepoint using the Kaplan-Meier method (using the  
4  
5 230 sts graph and stcurve command in STATA, respectively)  
6  
7

8 231  
9  
10 232 Using a conceptual framework, we also consider that admission directly to the ICU could also be  
11  
12 233 a mediator between the SFT and the primary outcome; therefore, we developed another  
13  
14 234 multivariable model not including the variable for direct admission to the ICU. The goodness of  
15  
16 235 fit for the multivariable Cox proportional hazard model was tested with a Hosmer and Lemeshow  
17  
18 236 test. For the Cox proportional hazard model, we assessed whether the hazard ratio was constant  
19  
20 237 over time using Schoenfeld residuals.  
21  
22  
23

24 238  
25  
26 239 For the secondary endpoints, we used multivariable logistic regression models with similar  
27  
28 240 independent variables as the model for 28-mortality outcome and used each sepsis management  
29  
30 241 process as an outcome. We estimated the total effect of the SFT on each sepsis management by  
31  
32 242 using the multivariable logistic regression models adjusted for difference in characteristics and  
33  
34 243 disease severity of the patients. This was because each sepsis management could be caused by  
35  
36 244 characteristics of the patients, disease severity and the SFT.<sup>20</sup>  
37  
38  
39

40 245  
41  
42 246 We also performed sensitivity analyses by using multivariable logistic regression model, excluding  
43  
44 247 patients enrolled prior to the implementation of the SFT programme, and by replacing direct  
45  
46 248 admission to the ICUs with admission to the ICUs within the first hospital day. All analyses were  
47  
48 249 performed with STATA 15.1 (StataCorp, College Station, TX, USA).  
49  
50

51 250  
52  
53  
54  
55  
56  
57  
58  
59  
60

## 251 **Patient and public involvement**

252 No patients were involved in setting the research question or the outcome measures, nor were they  
253 involved in developing plans for recruitment, design, or implementation of the study. No patients  
254 were asked to advice on interpretation or writing the results. The results will be disseminated to  
255 the public through online social media.

256

## 257 **RESULTS**

### 258 **Baseline characteristics**

259 The observational cohort study (Ubon-sepsis) included 5,001 patients presenting with community-  
260 acquired infections from March 2013 to January 2017, and 12 patients were excluded due to  
261 unknown 28-day mortality outcome. 3,806 (76%) met criteria for sepsis within the first 24 hours  
262 of admission with a modified SOFA score  $\geq 2$ , and were included for the analysis. Figure 1 shows  
263 the flow of participants through the study. Among 3,806 sepsis patients, 903 were enrolled in the  
264 SFT programme and considered as the SFT group, and 2,903 were not enrolled in the SFT  
265 programme, received standard of care, and considered as the non-exposed group. Of 2,903 sepsis  
266 patients in the non-exposed group, 1,636 were included in the observational cohort study prior to  
267 the implementation of SFT programme and 1,267 were after the implementation of the programme.

268

269 Table 1 shows the characteristics of the study patients. Patients in the SFT group were older and  
270 more likely to have underlying diseases of diabetes mellitus, cerebrovascular diseases and  
271 dyslipidemia. Patients included in the SFT group had higher severity of organ dysfunction  
272 determined by the modified SOFA score compared with the non-exposed group (median 6 [IQR

273 4-9] vs. 4 [IQR 3-6],  $p<0.001$ ). A higher proportion of patients in the SFT group were admitted  
 274 directly to the ICU compared with the non-exposed group (19% vs 5%,  $p<0.001$ ).

275  
 276 **Table 1 | Baseline characteristics of sepsis patients enrolled in the Sepsis Fast Track**  
 277 **programme<sup>1</sup> (SFT group) or standard of care (non-exposed group). Values are number**  
 278 **(percentages) unless stated otherwise**

| Characteristics                                 | SFT group <sup>2</sup><br>(n=903) | Non-exposed<br>group <sup>3</sup><br>(n=2903) |
|-------------------------------------------------|-----------------------------------|-----------------------------------------------|
| <b>Male gender</b>                              | 526 (58%)                         | 1653 (57%)                                    |
| <b>Age (years) (median [IQR])</b>               | 63 (49-74)                        | 56 (39-70)                                    |
| <b>Age group (years)</b>                        |                                   |                                               |
| 18-40                                           | 100 (11%)                         | 647 (22%)                                     |
| >40-60                                          | 277 (31%)                         | 875 (30%)                                     |
| >60-70                                          | 214 (24%)                         | 513 (18%)                                     |
| >70                                             | 312 (35%)                         | 868 (30%)                                     |
| <b>Comorbidities</b>                            |                                   |                                               |
| Hypertension                                    | 239 (26%)                         | 726 (25%)                                     |
| Diabetes mellitus                               | 213 (24%)                         | 594 (20%)                                     |
| Chronic kidney disease                          | 129 (14%)                         | 391 (13%)                                     |
| Dyslipidemia                                    | 66 (7%)                           | 152 (5%)                                      |
| Heart disease                                   | 48 (5%)                           | 183 (6%)                                      |
| Lung disease                                    | 67 (7%)                           | 239 (8%)                                      |
| Liver disease                                   | 33 (4%)                           | 91 (3%)                                       |
| Cerebrovascular disease                         | 29 (3%)                           | 55 (2%)                                       |
| Malignancy                                      | 13 (1%)                           | 47 (2%)                                       |
| Human immunodeficiency virus (HIV)              | 6 (1%)                            | 33 (1%)                                       |
| <b>Organ dysfunction</b>                        |                                   |                                               |
| Modified SOFA score (median [IQR])              | 6 (4-9)                           | 4 (3-6)                                       |
| Renal dysfunction <sup>4</sup>                  | 706 (78%)                         | 1846 (64%)                                    |
| Cardiovascular dysfunction <sup>4</sup>         | 811 (90%)                         | 1532 (53%)                                    |
| Coagulation dysfunction <sup>4</sup>            | 419 (46%)                         | 1562 (54%)                                    |
| Liver dysfunction <sup>4</sup>                  | 311 (34%)                         | 822 (28%)                                     |
| Respiratory dysfunction <sup>4</sup>            | 337 (37%)                         | 853 (29%)                                     |
| Central nervous system dysfunction <sup>4</sup> | 166 (18%)                         | 530 (18%)                                     |

| Characteristics                                          | SFT group <sup>2</sup><br>(n=903) | Non-exposed<br>group <sup>3</sup><br>(n=2903) |
|----------------------------------------------------------|-----------------------------------|-----------------------------------------------|
| <b>Transferred from other hospitals</b>                  | 874 (97%)                         | 2372 (84%)                                    |
| <b>Duration of symptoms<br/>(median [IQR])</b>           | 2 (1-3)                           | 3 (1-5)                                       |
| ≤ 2 days                                                 | 505 (56%)                         | 1191 (41%)                                    |
| 3-7 days                                                 | 362 (40%)                         | 1488 (51%)                                    |
| > 7 days                                                 | 36 (4%)                           | 224 (8%)                                      |
| <b>Presenting clinical syndromes<sup>5</sup></b>         |                                   |                                               |
| Septic shock                                             | 687 (76%)                         | 733 (25%)                                     |
| Acute febrile illness                                    | 206 (23%)                         | 940 (32%)                                     |
| Lower respiratory infection                              | 223 (25%)                         | 890 (31%)                                     |
| Sepsis                                                   | 225 (25%)                         | 273 (9%)                                      |
| Others                                                   | 13 (1%)                           | 456 (16%)                                     |
| Diarrheal illness                                        | 150 (17%)                         | 264 (9%)                                      |
| <b>Direct admission to the ICU</b>                       | 170 (19%)                         | 128 (4%)                                      |
| <b>Admission to the ICU within 24 hours of admission</b> | 270 (29%)                         | 370 (13%)                                     |
| <b>Blood culture positive for pathogenic organisms</b>   | 175 (19%)                         | 347 (12%)                                     |
| <b>Year</b>                                              |                                   |                                               |
| 2013                                                     | N/A                               | 1047 (26%)                                    |
| 2014                                                     | N/A                               | 1156 (29%)                                    |
| 2015                                                     | 369 (39%)                         | 956 (24%)                                     |
| 2016                                                     | 556 (59%)                         | 869 (21%)                                     |
| 2017                                                     | 14 (1%)                           | 22 (1%)                                       |

279

280 <sup>1</sup> SFT programme was implemented at the study hospital in January 2015.

281 <sup>2</sup> 903 patients of the Ubon-sepsis cohort were enrolled in SFT programme after the implementation of the SFT  
282 programme (Figure 1)

283 <sup>3</sup> Included 1,636 and 1,267 patients in the Ubon-sepsis cohort before and after the implementation of the SFT  
284 programme, respectively.

285 <sup>4</sup> Organ dysfunction defined as modified SOFA score was  $\geq 1$  for each organ system.<sup>16</sup>

286 <sup>5</sup> Patients may have more than one presenting clinical syndrome.

287



## 288 **Primary outcomes**

289 The primary outcome, mortality within 28 days, occurred in 205 of 903 (23%) in the SFT group  
290 and 574 of 2,903 (20%) in the non-exposed group (Figure 2A). In the primary analysis, patients in  
291 the SFT group were more likely to survive adjusted for baseline characteristics, severity of sepsis  
292 and direct admission to the ICUs (adjusted hazard ratio [aHR] 0.72, 95% CI 0.58-0.88,  $p=0.001$ ,  
293 Figure 2B and Supplementary Table 3). Older age, higher modified SOFA score, underlying  
294 disease of malignancy and chronic kidney disease, blood culture positive for pathogenic organisms  
295 and direct admission to the ICUs were associated with risk of mortality.

## 297 **Sensitivity Analyses**

298 As we considered that direct admission to the ICU could be a mediator between the SFT and the  
299 outcome, a sensitivity analysis was performed by excluding the variable direct admission to the  
300 ICU (Supplementary Table 4). The effect of SFT (aHR 0.77, 95% CI 0.63-0.94,  $p<0.001$ ) was also  
301 observed. We observed that constant proportional hazard assumption was not strongly hold in one  
302 variable (the modified SOFA score); therefore, additional sensitivity analyses were performed by  
303 using logistic multivariable models. The similar effect of SFT was observed (Supplementary Table  
304 5 and 6).

306 We also performed a sensitivity analysis by excluding the 1,636 patients enrolled in the  
307 observational study prior to the implementation of SFT programme. Similar differences in baseline  
308 characteristics were observed when comparing 903 patients in the SFT group to the 1,267 patients  
309 in the non-exposed group enrolled after the implementation of the SFT programme

1  
2  
3 310 (Supplementary Table 7). A higher chance of survival in the SFT group compared to the non-  
4  
5 311 exposed group was also observed (aHR 0.68, 95% CI 0.55 to 0.84,  $p < 0.001$ ; Supplementary Table  
6  
7 312 7). We also performed another sensitivity analysis by replacing direct admission to the ICUs with  
8  
9 313 admission to the ICUs within the first hospital day. Of 3,806 patients, 640 (17%) were admitted to  
10  
11 314 the ICUs within the first day of admission. A higher chance of survival in the SFT group compared  
12  
13 315 to the non-exposed group was also observed (aHR 0.72, 95% CI 0.59 to 0.88,  $p = 0.002$ ).  
14  
15  
16  
17 316

### 19 317 **Secondary outcomes**

21 318 Using multivariable logistic regression models, we found that patients in the SFT group were more  
22  
23 319 likely to receive most sepsis management interventions than patients in the non-exposed group  
24  
25 320 adjusting for baseline characteristics, severity of sepsis and direct admission to the ICU (Table 2).  
26  
27 321 Those included antibiotics, blood cultures, adrenergic agents, and placement of a urinary catheter  
28  
29 322 within the first day of hospitalization. However, sepsis patients in the SFT group were less likely  
30  
31 323 to receive mechanical ventilation compared with those in the non-exposed group adjusting for  
32  
33 324 baseline characteristics, severity of sepsis and direct admission to the ICUs group (adjusted odds  
34  
35 325 ratio [aOR] 0.30; 95% CI 0.24 to 0.38). We found that direct admission to the ICUs (aOR 5.77,  
36  
37 326 95% CI 4.20 to 7.92) and transfer from other hospitals (aOR 3.45, 95% CI 2.42 to 4.91) were  
38  
39 327 strongly associated with the requirement of mechanical ventilation.  
40  
41  
42  
43  
44  
45 328

### 47 329 **Table 2 | Clinical management within the first day of hospital**

| Clinical management <sup>1</sup>   | SFT group<br>(n=903) | Control group<br>(n=2903) | Adjusted odds ratio<br>(95% CI) | P value |
|------------------------------------|----------------------|---------------------------|---------------------------------|---------|
| <b>Antibiotic</b>                  | 897 (99%)            | 2497 (86%)                | 14.69 (6.36-33.91)              | <0.001  |
| <b>Blood culture</b>               | 829 (92%)            | 2387 (82%)                | 1.82 (1.35-2.45)                | <0.001  |
| <b>Urinary catheterization</b>     | 862 (95%)            | 1642 (57%)                | 12.02 (8.41-17.20)              | <0.001  |
| <b>Acute dialysis</b>              | 10 (1.1%)            | 23 (0.8%)                 | 1.96 (0.66-5.87)                | 0.23    |
| <b>Adrenergic agent</b>            | 706 (78%)            | 902 (31%)                 | 11.53 (9.10-14.61)              | <0.001  |
| <b>Mechanical ventilation</b>      | 290 (32%)            | 840 (29%)                 | 0.39 (0.31-0.49)                | <0.001  |
| <b>Direct admission to the ICU</b> | 170 (18.8%)          | 128 (4.4%)                | 4.34 (2.96-6.36)                | <0.001  |

330 <sup>1</sup>The effect of SFT on each clinical management were estimated by using the multivariable logistic regression models  
 331 adjusted for admission year, gender, age, comorbidities, modified SOFA score, transfer from other hospital, and blood  
 332 culture positive for pathogenic organisms, and direct admission to the ICU.

## 335 DISCUSSION

336 In this study evaluating patients with community-acquired sepsis, enrollment into a programme to  
 337 identify and initiate sepsis care implemented at the study hospital (SFT programme) was associated  
 338 with 28% lower risk of mortality. In recent years, there has been an increasing need to understand  
 339 benefit and cost effectiveness of implementation of sepsis care interventions in LMICs because of  
 340 concerns that international sepsis guidelines<sup>11</sup> may not be extrapolated to patients with tropical  
 341 infectious diseases<sup>7-9</sup> and to resource-limited settings with poor ICU capacity.<sup>10</sup> In this study we  
 342 show the effectiveness of sepsis protocol modified based on resource availability in a tropical  
 343 country, where causes of community-acquired sepsis include malaria and tropical viral diseases.<sup>16,</sup>  
 344 <sup>21-22</sup> Majority of sepsis patients in our study were managed on the general wards, including those  
 345 with respiratory failure or shock. Nonetheless, our study shows that enhancing sepsis care in the

1  
2  
3 346 emergency department and general medical wards, as well as improving access to ICUs can reduce  
4  
5 347 sepsis mortality in a LMIC.  
6

7 348  
8  
9  
10 349 The lower odds of receiving mechanical ventilation in the SFT group could be a sign of improved  
11  
12 350 sepsis care. Patients in the SFT group are monitored closely either in or outside the ICUs, and the  
13  
14 351 attending physicians aim to obviate the need for airway intubation when possible.<sup>7</sup> Attending  
15  
16 352 physicians may tend to provide mechanical ventilation to patients in the non-exposed group based  
17  
18  
19 353 on broad indications such as (1) airway protection, (2) hypercapnic respiratory failure, (3)  
20  
21 354 hypoxemic respiratory failure or (4) circulatory failure<sup>23-24</sup> because they may not be able to monitor  
22  
23  
24 355 patients' breathing and oxygen saturation as often as those enrolled in the SFT programme.  
25

26 356  
27  
28 357 It is not surprising that patients in the SFT group had more organ dysfunction than those in the  
29  
30  
31 358 non-exposed group. This is because the severity of organ dysfunction among patients with septic  
32  
33 359 shock, respiratory failure and alteration of conscious can be assessed clinically on admission, and  
34  
35 360 those patients could be enrolled in the SFT programme when the laboratory test results were not  
36  
37  
38 361 yet available. However, the non-exposed group were defined as having sepsis based on clinical  
39  
40 362 findings and all laboratory test results within 24 hours of admission (per protocol of Ubon-sepsis  
41  
42 363 cohort study<sup>16-17</sup>). Therefore, the non-exposed group could use laboratory test results (i.e. liver  
43  
44 364 function tests, creatinine level, international normalised ratio and activated partial thromplastin  
45  
46  
47 365 time) from blood specimens drawn on admission. Therefore, the SFT programme were more likely  
48  
49 366 to enroll patients with obvious signs of sepsis and septic shock; such as acute respiratory failure  
50  
51  
52  
53  
54  
55  
56  
57  
58  
59  
60

1  
2  
3 367 and hypotension, while Ubon-sepsis cohort could include sepsis patients with relatively lower  
4  
5 368 modified SOFA scores.  
6  
7

8 369

### 9 10 370 **Comparison with other studies**

11  
12 371 Our study is not the first to evaluate effectiveness of sepsis intervention in LMICs. Early  
13  
14 372 recognition and protocol directed intervention improves outcomes of sepsis in adults<sup>25-27</sup> and  
15  
16 373 severe infection in children<sup>28</sup> in LMICs. The optimal method of fluid resuscitation in sepsis in  
17  
18 374 tropical LMICs has not been determined.<sup>8, 25, 29-30</sup> Our resuscitation protocol is a simple guideline,  
19  
20  
21 375 and the SFT recommend doctors to be careful and adjust fluid resuscitation based on preliminary  
22  
23 376 diagnoses, underlying diseases and rapid diagnostic test results (i.e. if sepsis is caused by malaria  
24  
25  
26 377 or dengue infection). The implementation of the SFT programme in our study hospital and in  
27  
28 378 Thailand is consistent with the recommendation of “SCAN-TEACH-TREAT” programme  
29  
30 379 developed by Sepsis in Resource-Limited Settings Workgroup of the Surviving Sepsis Campaign.<sup>7</sup>  
31  
32  
33 380 The SFT programme evaluated resources in the setting (SCAN component), focused on  
34  
35 381 educational interventions on early recognition and management of sepsis among medical personnel  
36  
37 382 including physicians, nurses and students (TEACH component) and implemented pragmatic and  
38  
39 383 simple bundles into practice (TREAT component). In addition, the SFT programme has the strong  
40  
41  
42 384 support and endorsement of local health and governmental leaders.<sup>12</sup>  
43  
44

45 385

### 46 47 386 **Strength and limitations of the study**

48  
49 387 This study features four strengths. First, the study hospital utilized the published framework,  
50  
51 388 SCAN-TEACH-TREAT programme to develop a context specific quality of care improvement for  
52  
53  
54  
55  
56  
57  
58  
59  
60

1  
2  
3 389 sepsis,<sup>7</sup> and we closely monitor and evaluate the effectiveness of an intervention. Second, the study  
4  
5 390 took advantage of a robust prospective observational study design that strengthened causal  
6  
7  
8 391 inference by providing pre-intervention information, having an appropriate non-exposed group  
9  
10 392 from both pre and post-intervention periods, and controlling important confounding factors (i.e.  
11  
12 393 the modified SOFA score) which were measured systematically throughout the study period.  
13  
14 394 Third, this study incorporated several predictors of interest (measured sepsis management  
15  
16 395 interventions and admission to the ICUs). This allows us to identify that the increase in most  
17  
18 396 measured sepsis interventions associated with the SFT programme and that led to the survival  
19  
20 397 benefit among sepsis patients. Fourth, the focus on sepsis at a public tertiary-care hospital in  
21  
22 398 Thailand helped us to estimate the effect of sepsis protocol in a tropical resource-limited setting  
23  
24 399 with large sample size.  
25  
26  
27  
28

29 400  
30  
31 401 Our study had several limitations. First, a modified SOFA score was used because the dosage of  
32  
33 402 dobutamine, dopamine, epinephrine and norepinephrine were not recorded and arterial blood gases  
34  
35 403 were rarely performed. The modified SOFA score (maximum 23) may be lower than the SOFA  
36  
37 404 score (maximum 24). Nonetheless, the modified SOFA score is strongly associated with mortality  
38  
39 405 in sepsis.<sup>16-17</sup> Second, the proportional hazards assumption was met for all variables, including  
40  
41 406 the main variable (the SFT), except one controlled variable (the modified SOFA score). The  
42  
43 407 adjusted effect estimates could be under or overestimated due to residual confounding factors such  
44  
45 408 as improvement of care and profile of organ failure recognition overtimes. Third, due to the use of  
46  
47 409 observational data, the observed effects of the SFT on 28-day mortality in our study should be  
48  
49 410 interpreted conservatively as an association rather than a causation.  
50  
51  
52  
53  
54  
55  
56  
57  
58  
59

1  
2  
3 411  
4  
5 412 **Conclusions and future implications**  
6  
7  
8 413 Our study successfully demonstrated effectiveness of a sepsis programme implemented in a LMIC.  
9  
10 414 Measuring effectiveness of a sepsis programme is a complex issue, and we utilized a data of a  
11  
12 415 prospective observational study and carefully controlled for severity of sepsis and temporal trends  
13  
14 416 in our analyses. Care in sepsis patients improved after the implementation of the programme.  
15  
16 417 Additional research is needed to better understand cost of the intervention, long-term benefits and  
17  
18 418 impact of the programme on a national scale. National strategies aimed at saving lives from sepsis  
19  
20 419 in LMICs should be encouraged. Such strategies should include analysis of resources and local  
21  
22 420 circumstances, followed by development, implementation and assessment of customized  
23  
24 421 programmes.  
25  
26  
27  
28  
29  
30

31  
32 423 **Acknowledgement:**  
33

34 424 We thank all patients, their relatives, and staff of the Sunpasitthiprasong hospital who participated  
35  
36 425 in the study. We thank Mayura Malasit, Praweennuch Watanachaiprasert, Chayamon  
37  
38 426 Krainoonsing, Passaraporn Kesaphun, Nannicha Jirapornuwat, Gumphol Wongsuvan, Areeya  
39  
40 427 Faosap, Yaowaret Dokket, Sukhumal Pewlaorng, Jintana Suwannapruek, Prapass Wannapinij and  
41  
42 428 Diane Tomita for their clinical, laboratory and administrative support.  
43  
44  
45

46 429  
47  
48  
49  
50  
51  
52  
53  
54  
55  
56  
57  
58  
59  
60

1  
2  
3 **430 Contributors:**  
4

5 431 NPJD, TEW, and DL obtained grant funding. SB, VH, PT, TEW, and DL contributed to study  
6  
7 432 conception development and study design. SB, VH, PT, TEW and DL contributed to study  
8  
9 433 conduct, data collection, and study administration. VH and DL performed the statistical analysis  
10  
11 434 and interpreted the data and had full access to all of the data in the study. Both authors can take  
12  
13 435 responsibility for the integrity of the data and the accuracy of the data analysis. DL is a guarantor.  
14  
15 436 SB, VH, PT, TEW, and DL wrote the first draft of a manuscript, with input from SS, CB, PC, KR,  
16  
17 437 and AD. PP, BS, OW, and RC provided scientific or administrative support. All authors  
18  
19 438 contributed to results interpretation, critically revised, and approved the final submitted  
20  
21 439 manuscript. The corresponding author attests that all listed authors meet authorship criteria and  
22  
23 440 that no others meeting the criteria have been omitted.  
24  
25  
26  
27  
28

29 441

30  
31 **442 Funding:**  
32

33 443 The study was funded by the Wellcome Trust (090219/Z/09/Z) and National Heart, Lung and  
34  
35 444 Blood Institute, National Institutes of Health (R01HL113382). DL is supported by an intermediate  
36  
37 445 fellowship from the Wellcome Trust (101103/Z/13/Z). The funders had no role in the design and  
38  
39 446 conduct of the study, all study procedures, data collection, data analyses, data interpretation,  
40  
41 447 writing of the report, and the decision to submit the article for publication.  
42  
43  
44

45 448

46  
47 **449 Competing interests:**  
48

49 450 The authors declare that they have no completing interests.  
50

51 451  
52  
53  
54  
55  
56  
57  
58  
59  
60



1  
2  
3 452 **Ethics approvals:**  
4

5 453 The study was conducted the study in full compliance with the principles of good clinical practice  
6  
7 454 (GCP), and the ethical principles of the Declaration of Helsinki. The study protocol and related  
8  
9 455 documents were approved by Sunpasitthiprasong Hospital Ethics Committee (039/2556), the  
10  
11 456 Ethics Committee of the Faculty of Tropical Medicine, Mahidol University (MUTM2012-024-  
12  
13 457 01), the University of Washington Institutional Review Board (42988) and the Oxford Tropical  
14  
15 458 Research Ethics Committee at the University of Oxford (OXTREC172-12). Signed or  
16  
17 459 fingerprinted informed consent was obtained from the participants or their representatives before  
18  
19 460 enrollment.  
20  
21  
22  
23

24 461  
25  
26 462 **Data sharing:**  
27

28 463 The final database with the data dictionary are publicly available online  
29  
30 464 <https://doi.org/10.6084/m9.figshare.12102627>.  
31  
32

33 465 The lead authors (SB, VH and DL) affirm that the manuscript is an honest, accurate, and  
34  
35 466 transparent account of the study being reported; that no important aspects of the study have been  
36  
37 467 omitted; and that any discrepancies from the study as planned have been explained. This is an  
38  
39 468 Open Access article distributed in accordance with the terms of the Creative Commons Attribution  
40  
41 469 (CC BY 4.0) license, which permits unrestricted reuse, distribution, and reproduction in any  
42  
43 470 medium, provided the original work is properly cited. See:  
44  
45 471 <http://creativecommons.org/licenses/by/4.0/>  
46  
47  
48

49 472  
50  
51  
52  
53  
54  
55  
56  
57  
58  
59  
60

1  
2  
3 **473 Dissemination to participants and related patient and public communities:**  
4

5 474 The results of this study will be disseminated to physicians at the study hospital, health care  
6  
7 475 providers, policy makers, and academic communities through various mediums, including printed  
8  
9 476 report, internal hospital meetings, academic conferences, and institutional networks. The results  
10  
11 477 from this study will be used to inform the current Sepsis Fast Track programme at  
12  
13 478 Sunpasitthiprasong hospital and the community hospitals which are located in jurisdiction of the  
14  
15 479 study hospital catchment areas in the Northeast Thailand. The study results will not be  
16  
17 480 disseminated to patients or general population, because study results are in medical context.  
18  
19  
20  
21  
22  
23  
24  
25  
26  
27  
28  
29  
30  
31  
32  
33  
34  
35  
36  
37  
38  
39  
40  
41  
42  
43  
44  
45  
46  
47  
48  
49  
50  
51  
52  
53  
54  
55  
56  
57  
58  
59  
60

481 **References**

- 482 1 Singer M, Deutschman CS, Seymour CW, et al. The Third International Consensus  
483 Definitions for Sepsis and Septic Shock (Sepsis-3). *JAMA* 2016;315(8):801-10.  
484 doi: 10.1001/jama.2016.0287
- 485 2 Rhodes A, Evans LE, Alhazzani W, et al. Surviving Sepsis Campaign: International  
486 Guidelines for Management of Sepsis and Septic Shock 2016. *Crit Care Med*  
487 2017;45(3):486-552. doi: 10.1097/ccm.0000000000002255
- 488 3 WHO. WHO Sepsis Technical Expert Meeting - Meeting report Geneva:  
489 World Health Organization; 2018  
490 [Available from: [https://www.who.int/service\\_delivery/safety/areas/sepsis\\_meeting-report-](https://www.who.int/service_delivery/safety/areas/sepsis_meeting-report-2018.pdf)  
491 [2018.pdf](https://www.who.int/service_delivery/safety/areas/sepsis_meeting-report-2018.pdf) accessed 25 November 2019 2019].
- 492 4 Vincent J-L. The Clinical Challenge of Sepsis Identification and Monitoring. *PLoS Med*  
493 2016;13(5):e1002022. doi: 10.1371/journal.pmed.1002022
- 494 5 Rudd KE, Johnson SC, Agesa KM, et al. Global, regional, and national sepsis incidence  
495 and mortality, 1990&#x2013;2017: analysis for the Global Burden of Disease Study. *The*  
496 *Lancet* 2020;395(10219):200-11.  
497 doi: 10.1016/S0140-6736(19)32989-7
- 498 6 Reinhart K, Daniels R, Kissoon N, et al. Recognizing Sepsis as a Global Health Priority  
499 — A WHO Resolution. *N Engl J Med* 2017;377(5):414-17.  
500 doi: 10.1056/NEJMp1707170

- 1  
2  
3  
4  
5  
6  
7 501 7 Kwizera A, Baelani I, Mer M, et al. The long sepsis journey in low- and middle-income  
8 countries begins with a first step...but on which road? *Crit Care* 2018;22(1):64.  
9 502 doi: 10.1186/s13054-018-1987-z  
10  
11 503  
12  
13 504 8 McGloughlin S, Richards GA, Nor MBM, et al. Sepsis in tropical regions: Report from  
14 the task force on tropical diseases by the World Federation of Societies of Intensive and  
15 505 Critical Care Medicine. *J Crit Care* 2018;46:115-18.  
16  
17 506  
18 507 doi: 10.1016/j.jcrc.2017.12.018  
19  
20  
21  
22 508 9 Becker JU, Theodosis C, Jacob ST, et al. Surviving sepsis in low-income and middle-  
23 income countries: new directions for care and research. *Lancet Infect Dis* 2009;9(9):577-  
24 509 82. doi: 10.1016/S1473-3099(09)70135-5  
25  
26 510  
27  
28 511 10 Schultz MJ, Dunser MW, Dondorp AM, et al. Current challenges in the management of  
29 sepsis in ICUs in resource-poor settings and suggestions for the future.  
30  
31 512  
32  
33 513 *Intensive Care Med* 2017;43(5):612-24. doi: 10.1007/s00134-017-4750-z  
34  
35  
36 514 11 Dellinger RP, Levy MM, Rhodes A, et al. Surviving Sepsis Campaign: international  
37 guidelines for management of severe sepsis and septic shock, 2012.  
38  
39 515  
40 516 *Intensive Care Med* 2013;39(2):165-228. doi: 10.1007/s00134-012-2769-8  
41  
42  
43 517 12 Office of permanent secretatry, Ministry of Public Health, Thailand. The Development of  
44 Health Service Plan and Indicators of Health Outcomes 2018:8.  
45  
46 518  
47  
48 519 13 Ruangchan S, Chusri S, Saengsanga P, et al. Clinical Outcomes of Community-Acquired  
49 Severe Sepsis after Implementation of a Simple Severe Sepsis Fast Track.  
50 520  
51  
52 521 *J Med Assoc Thai* 2016;99(8):877-85.  
53  
54  
55  
56  
57  
58  
59  
60

- 1  
2  
3  
4  
5  
6 522 14 Ittisanyakorn M, Ruchichanantakul S, Vanichkulbodee A, et al. Prevalence and factors  
7 associated with one-year mortality of infectious diseases among elderly emergency  
8 department patients in a middle-income country. *BMC Infect Dis* 2019;19(1):662.  
9 523  
10 524  
11  
12  
13 525 doi: 10.1186/s12879-019-4301-z  
14  
15 526 15 Clarke GM, Conti S, Wolters AT, et al. Evaluating the impact of healthcare interventions  
16 using routine data. *BMJ* 2019;365:l2239. doi: 10.1136/bmj.l2239  
17 527  
18  
19 528 16 Hantrakun V, Somayaji R, Teparrukkul P, et al. Clinical epidemiology and outcomes of  
20 community acquired infection and sepsis among hospitalized patients in a resource limited  
21 529  
22 setting in Northeast Thailand: A prospective observational study (Ubon-sepsis). *PLoS One*  
23 530  
24 2018;13(9):e0204509. doi: 10.1371/journal.pone.0204509  
25 531  
26  
27 532 17 Rudd KE, Hantrakun V, Somayaji R, et al. Early management of sepsis in medical patients  
28 in rural Thailand: a single-center prospective observational study.  
29 533  
30 *J Intensive Care* 2019;7:55. doi: 10.1186/s40560-019-0407-z  
31 534  
32  
33 535 18 Seymour CW, Liu VX, Iwashyna TJ, et al. Assessment of Clinical Criteria for Sepsis: For  
34 the Third International Consensus Definitions for Sepsis and Septic Shock (Sepsis-3).  
35 536  
36 *Jama* 2016;315(8):762  
37 537  
38  
39 538 19 Craig P, Cooper C, Gunnell D, et al. Using natural experiments to evaluate population  
40 health interventions: new Medical Research Council guidance.  
41 539  
42 *J Epidemiol Community Health* 2012;66(12):1182-6. doi: 10.1136/jech-2011-200375  
43 540  
44  
45 541 20 Westreich D, Greenland S. The Table 2 Fallacy: Presenting and Interpreting Confounder  
46 and Modifier Coefficients. *Am J Epidemiol* 2013;177(4):292-98.  
47 542  
48  
49 543 doi: 10.1093/aje/kws412  
50  
51  
52  
53  
54  
55  
56  
57  
58  
59  
60

- 1  
2  
3  
4  
5  
6 544 21 Teparrukkul P, Hantrakun V, Imwong M, et al. Utility of qSOFA and modified SOFA in  
7  
8 severe malaria presenting as sepsis. *PLoS One* 2019;14(10):e0223457.  
9 545  
10  
11 546 doi: 10.1371/journal.pone.0223457  
12  
13 547 22 Teparrukkul P, Hantrakun V, Day NPJ, et al. Management and outcomes of severe dengue  
14  
15 patients presenting with sepsis in a tropical country. *PLoS One* 2017;12(4):e0176233. doi:  
16 548  
17 10.1371/journal.pone.0176233  
18 549  
19  
20 550 23 Pierson DJ. Indications for mechanical ventilation in adults with acute respiratory failure.  
21  
22  
23 551 *Respir Care* 2002;47(3):249-62; discussion 62-5.  
24  
25 552 24 Pham T, Brochard LJ, Slutsky AS. Mechanical Ventilation: State of the Art. *Mayo Clin*  
26  
27 553 *Proc* 2017;92(9):1382-400. doi: 10.1016/j.mayocp.2017.05.004  
28  
29 554 25 Jacob ST, Banura P, Baeten JM, et al. The impact of early monitored management on  
30  
31 survival in hospitalized adult Ugandan patients with severe sepsis:  
32 555  
33 a prospective intervention study\*. *Crit Care Med* 2012;40(7):2050-8.  
34 556  
35 doi: 10.1097/CCM.0b013e31824e65d7  
36 557  
37  
38 558 26 Machado FR, Ferreira EM, Schippers P, et al. Implementation of sepsis bundles in public  
39  
40 hospitals in Brazil: a prospective study with heterogeneous results. *Crit Care*  
41 559  
42 2017;21(1):268. doi: 10.1186/s13054-017-1858-z  
43 560  
44  
45 561 27 Noritomi DT, Ranzani OT, Monteiro MB, et al. Implementation of a multifaceted sepsis  
46  
47 education program in an emerging country setting: clinical outcomes and cost-  
48 562  
49 effectiveness in a long-term follow-up study. *Intensive Care Med* 2014;40(2):182-91. doi:  
50 563  
51 10.1007/s00134-013-3131-5  
52 564  
53  
54  
55  
56  
57  
58  
59  
60

- 1  
2  
3  
4  
5  
6 565 28 Sazawal S, Black RE, Pneumonia Case Management Trials G. Effect of pneumonia case  
7  
8 566 management on mortality in neonates, infants, and preschool children:  
9  
10 567 a meta-analysis of community-based trials. *Lancet Infect Dis* 2003;3(9):547-56.  
11  
12 568 doi: 10.1016/s1473-3099(03)00737-0  
13  
14  
15 569 29 Maitland K, Kiguli S, Opoka RO, et al. Mortality after fluid bolus in African children  
16  
17 570 with severe infection. *N Engl J Med* 2011;364(26):2483-95.  
18  
19 571 doi: 10.1056/NEJMoa1101549  
20  
21  
22 572 30 Andrews B, Semler MW, Muchemwa L, et al. Effect of an Early Resuscitation Protocol  
23  
24 573 on In-hospital Mortality Among Adults With Sepsis and Hypotension: A Randomized  
25  
26 574 Clinical Trial. *JAMA* 2017;318(13):1233-40.  
27  
28 575 doi: 10.1001/jama.2017.10913  
29  
30  
31  
32 576  
33  
34 577  
35  
36 578  
37  
38  
39  
40  
41  
42  
43  
44  
45  
46  
47  
48  
49  
50  
51  
52  
53  
54  
55  
56  
57  
58  
59  
60

1  
2  
3  
4  
5  
6 579 **Figure legends**

7  
8  
9 580 **Figure 1| Flow of participants through study**

10  
11 581 **Footnote of figure 1:** This study used the data of an observational study on sepsis patients (Ubon-  
12  
13 582 sepsis) from March 2013 to January 2017 to evaluate the effectiveness of a Sepsis Fast Track  
14  
15 583 (SFT) programme implemented at the study hospital in January 2015  
16  
17

18 584

19  
20 585 **Figure 2| (A) Unadjusted probability of survival and (B) Adjusted probability of survival**  
21  
22 586 **based on the multivariable Cox proportional hazard regression model**  
23

24  
25 587

26  
27 588  
28  
29  
30  
31  
32  
33  
34  
35  
36  
37  
38  
39  
40  
41  
42  
43  
44  
45  
46  
47  
48  
49  
50  
51  
52  
53  
54  
55  
56  
57  
58  
59  
60



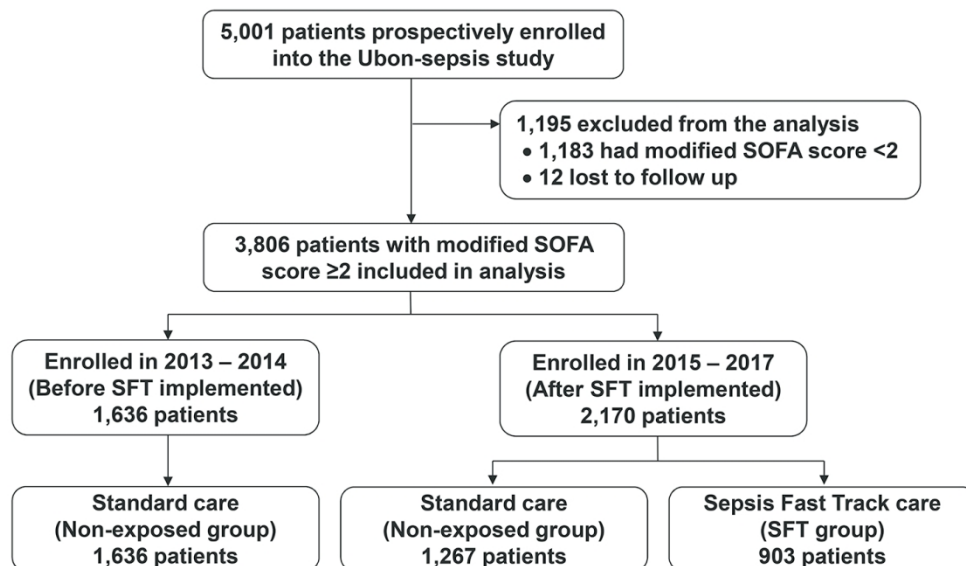

Figure 1 Flow of participants through study

1  
2  
3  
4  
5  
6  
7  
8  
9  
10  
11  
12  
13  
14  
15  
16  
17  
18  
19  
20  
21  
22  
23  
24  
25  
26  
27  
28  
29  
30  
31  
32  
33  
34  
35  
36  
37  
38  
39  
40  
41  
42  
43  
44  
45  
46  
47  
48  
49  
50  
51  
52  
53  
54  
55  
56  
57  
58  
59  
60

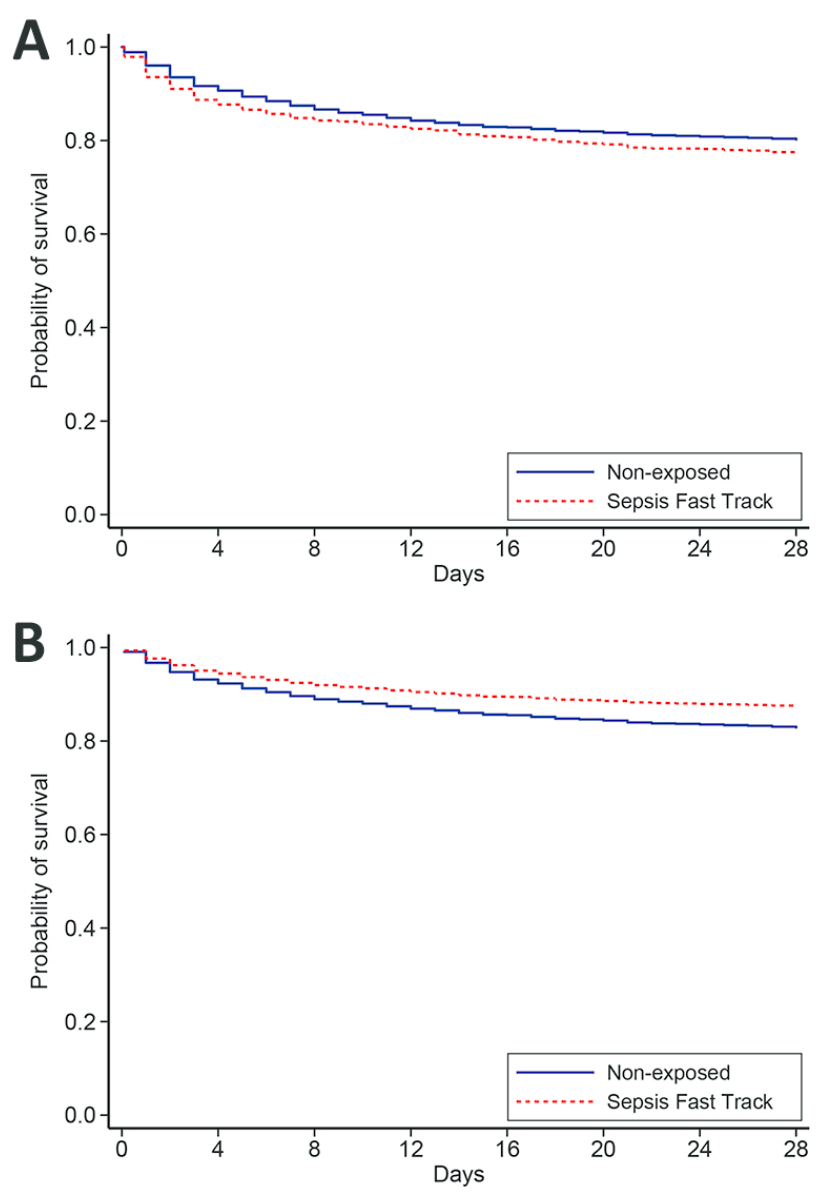

Figure 2 (A) Unadjusted probability of survival and (B) Adjusted probability of survival based on the multivariable Cox proportional hazard regression model

1  
2  
3  
4  
5  
6  
7  
8  
9  
10  
11  
12  
13  
14  
15  
16  
17  
18  
19  
20  
21  
22  
23  
24  
25  
26  
27  
28  
29  
30  
31  
32  
33  
34  
35  
36  
37  
38  
39  
40  
41  
42  
43  
44  
45  
46  
47  
48  
49  
50  
51  
52  
53  
54  
55  
56  
57  
58  
59  
60

1 **Effectiveness of a sepsis programme in a resource-limited setting: a retrospective analysis of**  
2 **data of a prospective observational study (Ubon-sepsis)**

3  
4  
5  
6  
7  
8  
9  
10  
11  
12  
13  
14  
15  
16  
17  
18  
19  
20  
21  
22  
23  
24  
25  
26  
27  
28  
29  
30  
31  
32  
33  
34  
35  
36  
37  
38  
39  
40  
41  
42  
43  
44  
45  
46  
47  
48  
49  
50  
51  
52  
53  
54  
55  
56  
57  
58  
59  
60

Suchart Booraphun MD<sup>1</sup>, Viriya Hantrakun PhD<sup>2</sup>, Suwatthiya Siriboon MD<sup>1</sup>, Chaiyaporn Boonsri MD<sup>1</sup>, Pulyamon Poomthong MD<sup>1</sup>, Bung-Orn Singkaew BNS<sup>1</sup>, Oratai Wasombat BNS<sup>1</sup>, Parinya Chamnan MD, PhD<sup>1</sup>, Ratapum Champunot MD<sup>3</sup>, Kristina Rudd MD, MPH<sup>4,5</sup>, Nicholas PJ. Day<sup>2,6</sup> MD<sup>2</sup>, PhD, Arjen M. Dondorp MD, PhD<sup>2,6</sup>, Prapit Teparrukkul MD<sup>1</sup>, T. Eoin West MD, MPH<sup>5,7</sup>, Direk Limmathurotsakul MD, PhD<sup>2,6,8</sup>

Short Title: Sepsis Fast Track Thailand

<sup>1</sup>Sunpasitthiprasong Hospital, Ubon Ratchathani, Thailand

<sup>2</sup>Mahidol Oxford Tropical Medicine Research Unit, Faculty of Tropical Medicine, Mahidol University, Bangkok, Thailand

<sup>3</sup>Department of Internal Medicine, Buddhachinaraj Phitsanulok Hospital, Phitsanulok, Thailand

<sup>4</sup>Department of Critical Care Medicine, University of Pittsburgh, Pittsburgh, Pennsylvania, USA

<sup>5</sup>Division of Pulmonary, Critical Care, and Sleep Medicine, University of Washington, Seattle, United States

<sup>6</sup>Centre for Tropical Medicine and Global Health, Nuffield Department of Medicine, University of Oxford, Churchill Hospital, Oxford, United Kingdom

<sup>7</sup>Department of Microbiology and Immunology, Faculty of Tropical Medicine, Mahidol University, Bangkok, Thailand

<sup>8</sup>Department of Tropical Hygiene, Faculty of Tropical Medicine, Mahidol University, Bangkok, Thailand

25 **Supplementary Table 1 | Criteria used to systematically enroll patents into Sepsis Fast Track**  
26 **(SFT) upon admission**

27 **1. Present with 2 or more of below Signs of systemic inflammatory response syndrome**  
28 **(SIRS)**

- 29 • Body temperature > 38.3 °C or < 36.0 °C
- 30 • Heart rate > 90 bpm
- 31 • Respiratory rate > 20 pm or PaCO<sub>2</sub> < 32 mmHg
- 32 • WBC > 12,000 /μL or < 4,000 /μL or Band forms > 10%

33 **2. Suspected sources of infection**

- 34 • Pneumonia
- 35 • Urinary track infection
- 36 • Intra-abdominal infection
- 37 • Skin and soft tissue infection
- 38 • CNS infection
- 39 • Others infections or unspecified source of infection

40 **3. Diagnostic criteria for severe sepsis:** patient met criteria in no 1 and 2 and has at least  
41 one of the following criteria

- 42 • Mottled skin
- 43 • Capillary refilling time ≥ 3 seconds
- 44 • Urine output < 0.5 ml/kg/hour
- 45 • Abrupt change in mental status
- 46 • Acute respiratory failure
- 47 • Platelet count < 100,000 /μL
- 48 • Disseminated intravascular coagulation
- 49 • Lactate > 2 mmol/L
- 50 • SBP < 90 mmHg or MAP < 65 mmHg

51 **4. Diagnostic criteria for septic shock:** patient who are severe sepsis and has at least 1 of  
52 the following criteria

- 53 • SBP < 90 mmHg or MAP < 65 mmHg after crystalliod administration ≥ 40-60  
54 ml/kg of body weight OR after colloid administration ≥ 20-30 ml/kg of body weight
- 55 • Require administration of dopamine > 5μg/kg of BW/min or norepinephrine/  
56 epinephrine > 0.02 μg/kg of BW/min to maintain MAP to be > 65 mmHg

1  
2  
3  
4  
5  
6  
7  
8  
9  
10  
11  
12  
13  
14  
15  
16  
17  
18  
19  
20  
21  
22  
23  
24  
25  
26  
27  
28  
29  
30  
31  
32  
33  
34  
35  
36  
37  
38  
39  
40  
41  
42  
43  
44  
45  
46  
47  
48  
49  
50  
51  
52  
53  
54  
55  
56  
57  
58 **Supplementary Table 2 | Systemic manifestation of infection criteria used for enrollment in**

59 **Ubon-Sepsis Cohort**

60 **General parameters**

- 61 1. Fever or hypothermia (Core body temperature defined as  $> 38.3$  °C or  $< 36.0$  °C)
- 62 2. Tachycardia (heart rate  $> 90$  beats per minute)
- 63 3. Tachypnea (respiratory rate  $> 20$  per minute)
- 64 4. Altered mental status with Glasgow Coma Score (GCS)  $< 15$  or  $< 10$  if intubated
- 65 5. Hyperglycemia (plasma glucose  $> 140$  mg/dL) in the absence of diabetes

66 **Inflammatory parameters**

- 67 6. Leukocytosis (white blood cell count  $> 12,000/\mu\text{L}$ ), leukopenia (white blood cell count  $< 4000/\mu\text{L}$ ) or immature forms  $> 10\%$
- 68 7. Plasma C-reactive protein  $> 2$  SD above the normal value
- 69 8. Plasma procalcitonin  $> 2$  SD above the normal value

70 **Hemodynamic parameters**

- 71 9. Arterial hypotension (systolic blood pressure (SBP)  $< 90$  mmHg, mean arterial pressure (MAP)  $< 70$  mmHg, or SBP decrease  $> 40$  mmHg)

72 **Organ dysfunction parameters**

- 73 10. Low oxygen saturation determined by pulse oximetry ( $\text{SpO}_2 < 95\%$ ) determined by pulse oximetry
- 74 11. Arterial hypoxemia ( $\text{PaO}_2 / \text{FIO}_2 < 300$ )
- 75 12. Acute oliguria (urine output  $< 0.5$  mL/kg/hr or 45 mmol/L for 2 hours)
- 76 13. Creatinine increase  $> 0.5$  mg/dL
- 77 14. Coagulation abnormalities (international normalised ratio  $> 1.5$  or activated partial thromboplastin time  $> 60$  seconds)
- 78 15. Thrombocytopenia (Platelet count  $< 100,000$  cells/ $\mu\text{L}$ )
- 79 16. Ileus (absent bowel sounds)
- 80 17. Hyperbilirubinaemia (plasma total bilirubin  $> 4$  mg/dL)

81 **Tissue perfusion parameters**

- 82 18. Hyperlactatemia ( $> 1$  mmol/L)
  - 83 19. Decreased capillary refill or mottling
  - 84 20. Significant edema or positive fluid balance
- 85  
86  
87  
88  
89

90 **Supplementary Table 3 | Factors associated with 28-day mortality using multivariable Cox**  
 91 **proportional hazards model**

| Variables                                              | Died<br>(n=779) | Survived<br>(n=3027) | Adjusted hazard ratio<br>(95%CI) | P value |
|--------------------------------------------------------|-----------------|----------------------|----------------------------------|---------|
| <b>SFT group<sup>1</sup></b>                           | 205 (26%)       | 698 (23%)            | 0.72 (0.58-0.88)                 | 0.001   |
| <b>Male gender</b>                                     | 445 (57%)       | 698 (23%)            | 0.87 (0.75-1.01)                 | 0.06    |
| <b>Age group (years) (n [%])</b>                       |                 |                      |                                  |         |
| • 18-40                                                | 59 (8%)         | 688 (23%)            | 1                                | <0.001  |
| • >40-60                                               | 222 (29%)       | 930 (31%)            | 1.72 (1.28-2.30)                 |         |
| • >60-70                                               | 159 (20%)       | 568 (19%)            | 2.10 (1.54-2.86)                 |         |
| • >70                                                  | 339 (44%)       | 841 (28%)            | 3.41 (2.57-4.53)                 |         |
| <b>Transferred from other hospital</b>                 | 715 (92%)       | 2595 (86%)           | 1.14 (0.88-1.49)                 | 0.33    |
| <b>Modified SOFA score (median, IQR)</b>               | 6 (4-9)         | 4 (3-6)              | 1.23 (1.21-1.26)                 | <0.001  |
| <b>Comorbidities</b>                                   |                 |                      |                                  |         |
| • Diabetes mellitus                                    | 205 (26%)       | 602 (20%)            | 1.06 (0.90-1.26)                 | 0.47    |
| • Chronic kidney disease                               | 141 (18%)       | 379 (13%)            | 1.22 (1.01-1.48)                 | 0.04    |
| • Liver disease                                        | 39 (5%)         | 85 (3%)              | 1.27 (0.91-1.76)                 | 0.16    |
| • Malignancy                                           | 24 (3%)         | 36 (1%)              | 2.64 (1.75-3.99)                 | <0.001  |
| <b>Blood culture positive for pathogenic organisms</b> | 190 (24%)       | 332 (11%)            | 1.83 (1.55-2.17)                 | <0.001  |
| <b>Year</b>                                            |                 |                      |                                  |         |
| • 2013                                                 | 165 (21%)       | 637 (21%)            | 1                                | 0.30    |
| • 2014                                                 | 183 (23%)       | 651 (22%)            | 1.03 (0.83-1.27)                 |         |
| • 2015                                                 | 207 (27%)       | 808 (27%)            | 1.05 (0.84-1.31)                 |         |
| • 2016 <sup>2</sup>                                    | 224 (29%)       | 931 (31%)            | 0.88 (0.70-1.11)                 |         |
| <b>Direct admission to the ICU</b>                     | 128 (16%)       | 170 (6%)             | 1.68 (1.36-2.06)                 | <0.001  |

92 <sup>1</sup> Enrolled in the Sepsis Fast Track (SFT) programme

93 <sup>2</sup> Included 28 patients in 2017

94

95 **Supplementary Table 4 | Factors associated with 28-day mortality using multivariable Cox**  
 96 **proportional hazards model without a variable of the direct admission to the ICU**

| Variables                                              | Died<br>(n=779) | Survived<br>(n=3027) | Adjusted hazard ratio<br>(95%CI) | P value |
|--------------------------------------------------------|-----------------|----------------------|----------------------------------|---------|
| <b>SFT group<sup>1</sup></b>                           | 205 (26%)       | 698 (23%)            | 0.77 (0.63-0.94)                 | 0.01    |
| <b>Male gender</b>                                     | 445 (57%)       | 698 (23%)            | 0.86 (0.74-1.00)                 | 0.05    |
| <b>Age group (years) (n [%])</b>                       |                 |                      |                                  |         |
| • 18-40                                                | 59 (8%)         | 688 (23%)            | 1                                | <0.001  |
| • >40-60                                               | 222 (29%)       | 930 (31%)            | 1.69 (1.26-2.26)                 |         |
| • >60-70                                               | 159 (20%)       | 568 (19%)            | 2.07 (1.52-2.81)                 |         |
| • >70                                                  | 339 (44%)       | 841 (28%)            | 3.32 (2.50-4.41)                 |         |
| <b>Transferred from other hospital</b>                 | 715 (92%)       | 2595 (86%)           | 1.16 (0.89-1.52)                 | 0.26    |
| <b>Modified SOFA score (median, IQR)</b>               | 6 (4-9)         | 4 (3-6)              | 1.25 (1.22-1.27)                 | <0.001  |
| <b>Comorbidities</b>                                   |                 |                      |                                  |         |
| • Diabetes mellitus                                    | 205 (26%)       | 602 (20%)            | 1.08 (0.91-1.27)                 | 0.39    |
| • Chronic kidney disease                               | 141 (18%)       | 379 (13%)            | 1.20 (0.99-1.45)                 | 0.07    |
| • Liver disease                                        | 39 (5%)         | 85 (3%)              | 1.24 (0.89-1.72)                 | 0.20    |
| • Malignancy                                           | 24 (3%)         | 36 (1%)              | 2.52 (1.67-3.81)                 | <0.001  |
| <b>Blood culture positive for pathogenic organisms</b> | 190 (24%)       | 332 (11%)            | 1.83 (1.54-2.16)                 | <0.001  |
| <b>Year</b>                                            |                 |                      |                                  |         |
| • 2013                                                 | 165 (21%)       | 637 (21%)            | 1                                | 0.34    |
| • 2014                                                 | 183 (23%)       | 651 (22%)            | 0.98 (0.79-1.21)                 |         |
| • 2015                                                 | 207 (27%)       | 808 (27%)            | 1.01 (0.81-1.26)                 |         |
| • 2016 <sup>2</sup>                                    | 224 (29%)       | 931 (31%)            | 0.85 (0.68-1.07)                 |         |

97 <sup>1</sup> Enrolled in the Sepsis Fast Track (SFT) programme

98 <sup>2</sup> Included 28 patients in 2017

99 **Supplementary Table 5 | Factors associated with 28-day mortality using logistic**  
 100 **multivariable model**

| Variables                                              | Died<br>(n=779) | Survived<br>(n=3027) | Adjusted odds ratio<br>(95%CI) | P value |
|--------------------------------------------------------|-----------------|----------------------|--------------------------------|---------|
| <b>SFT group<sup>1</sup></b>                           | 205 (26%)       | 698 (23%)            | 0.61 (0.48-0.79)               | <0.001  |
| <b>Male gender</b>                                     | 445 (57%)       | 698 (23%)            | 0.88 (0.73-1.06)               | 0.18    |
| <b>Age group (years) (n [%])</b>                       |                 |                      |                                |         |
| • 18-40                                                | 59 (8%)         | 688 (23%)            | 1                              | <0.001  |
| • >40-60                                               | 222 (29%)       | 930 (31%)            | 1.91 (1.36-2.66)               |         |
| • >60-70                                               | 159 (20%)       | 568 (19%)            | 2.54 (1.78-3.63)               |         |
| • >70                                                  | 339 (44%)       | 841 (28%)            | 4.76 (3.43-6.59)               |         |
| <b>Transferred from other hospital</b>                 | 715 (92%)       | 2595 (86%)           | 1.21 (0.89-1.65)               | 0.23    |
| <b>Modified SOFA score (median, IQR)</b>               | 6 (4-9)         | 4 (3-6)              | 1.30 (1.26-1.34)               | <0.001  |
| <b>Comorbidities</b>                                   |                 |                      |                                |         |
| • Diabetes mellitus                                    | 205 (26%)       | 602 (20%)            | 1.12 (0.91-1.39)               | 0.29    |
| • Chronic kidney disease                               | 141 (18%)       | 379 (13%)            | 1.20 (0.94-1.53)               | 0.13    |
| • Liver disease                                        | 39 (5%)         | 85 (3%)              | 1.34 (0.85-2.10)               | 0.21    |
| • Malignancy                                           | 24 (3%)         | 36 (1%)              | 3.65 (2.05-6.51)               | <0.001  |
| <b>Blood culture positive for pathogenic organisms</b> | 190 (24%)       | 332 (11%)            | 2.08 (1.66-2.61)               | <0.001  |
| <b>Year</b>                                            |                 |                      |                                |         |
| • 2013                                                 | 165 (21%)       | 637 (21%)            | 1                              | 0.64    |
| • 2014                                                 | 183 (23%)       | 651 (22%)            | 1.05 (0.80-1.37)               |         |
| • 2015                                                 | 207 (27%)       | 808 (27%)            | 1.05 (0.80-1.38)               |         |
| • 2016 <sup>2</sup>                                    | 224 (29%)       | 931 (31%)            | 0.91 (0.69-1.21)               |         |
| <b>Admitted directly to an ICU upon admission</b>      | 128 (16%)       | 170 (6%)             | 1.95 (1.45-2.62)               | <0.001  |

<sup>1</sup> Enrolled in the Sepsis Fast Track (SFT) programme

<sup>2</sup> Included 28 patients in 2017



104 **Supplementary Table 6 | Factors associated with 28-day mortality using logistic**  
 105 **multivariable model without a variable of the direct admission to the ICU**

| Variables                                              | Died<br>(n=779) | Survived<br>(n=3027) | Adjusted odds ratio<br>(95%CI) | P value |
|--------------------------------------------------------|-----------------|----------------------|--------------------------------|---------|
| <b>SFT group<sup>1</sup></b>                           | 205 (26%)       | 698 (23%)            | 0.67 (0.53-0.86)               | 0.002   |
| <b>Male gender</b>                                     | 445 (57%)       | 698 (23%)            | 0.87 (0.73-1.05)               | 0.14    |
| <b>Age group (years) (n [%])</b>                       |                 |                      |                                |         |
| • 18-40                                                | 59 (8%)         | 688 (23%)            | 1                              | <0.001  |
| • >40-60                                               | 222 (29%)       | 930 (31%)            | 1.85 (1.33-2.58)               |         |
| • >60-70                                               | 159 (20%)       | 568 (19%)            | 2.44 (1.71-3.46)               |         |
| • >70                                                  | 339 (44%)       | 841 (28%)            | 4.55 (3.29-6.28)               |         |
| <b>Transferred from other hospital</b>                 | 715 (92%)       | 2595 (86%)           | 1.23 (0.90-1.68)               | 0.19    |
| <b>Modified SOFA score (median, IQR)</b>               | 6 (4-9)         | 4 (3-6)              | 1.32 (1.28-1.36)               | <0.001  |
| <b>Comorbidities</b>                                   |                 |                      |                                |         |
| • Diabetes mellitus                                    | 205 (26%)       | 602 (20%)            | 1.16 (0.94-1.43)               | 0.17    |
| • Chronic kidney disease                               | 141 (18%)       | 379 (13%)            | 1.17 (0.92-1.49)               | 0.20    |
| • Liver disease                                        | 39 (5%)         | 85 (3%)              | 1.31 (0.84-2.06)               | 0.23    |
| • Malignancy                                           | 24 (3%)         | 36 (1%)              | 3.49 (1.95-6.24)               | <0.001  |
| <b>Blood culture positive for pathogenic organisms</b> | 190 (24%)       | 332 (11%)            | 2.08 (1.67-2.61)               | <0.001  |
| <b>Year</b>                                            |                 |                      |                                |         |
| • 2013                                                 | 165 (21%)       | 637 (21%)            | 1                              | 0.70    |
| • 2014                                                 | 183 (23%)       | 651 (22%)            | 1.00 (0.77-1.31)               |         |
| • 2015                                                 | 207 (27%)       | 808 (27%)            | 1.01 (0.77-1.33)               |         |
| • 2016 <sup>2</sup>                                    | 224 (29%)       | 931 (31%)            | 0.89 (0.67-1.17)               |         |

106 <sup>1</sup> Enrolled in the Sepsis Fast Track (SFT) programme

107 <sup>2</sup> Included 28 patients in 2017

108

109 **Supplementary Table 7 | Factors associated with 28-day mortality using multivariable Cox**  
 110 **proportional hazards model in 2,170 patients enrolled into the study after the**  
 111 **implementation of the Sepsis Fast Track (SFT) programme**

| Variables                                                  | Died<br>(n=431) | Survived<br>(n=1739) | Adjusted hazard ratio<br>(95%CI) | P value |
|------------------------------------------------------------|-----------------|----------------------|----------------------------------|---------|
| <b>SFT group</b>                                           | 205 (48%)       | 698 (40%)            | 0.68 (0.55-0.84)                 | <0.001  |
| <b>Male gender</b>                                         | 254(59%)        | 992 (57%)            | 0.89 (0.73-1.09)                 | 0.26    |
| <b>Age group (years) (n [%])</b>                           |                 |                      |                                  |         |
| • 18-40                                                    | 30 (7%)         | 363(21%)             | 1                                | <0.001  |
| • >40-60                                                   | 125 (29%)       | 502 (29%)            | 1.97 (1.31-2.95)                 |         |
| • >60-70                                                   | 85 (20%)        | 359 (21%)            | 1.97 (1.28-3.03)                 |         |
| • >70                                                      | 191 (44%)       | 515 (30%)            | 3.33 (2.24-4.95)                 |         |
| <b>Transferred from other<br/>hospital</b>                 | 406 (94%)       | 1513 (87%)           | 1.49 (0.99-2.26)                 | 0.06    |
| <b>Modified SOFA score<br/>(median, IQR)</b>               | 7 (5-10)        | 4 (3-6)              | 1.24 (1.21-1.28)                 | <0.001  |
| <b>Comorbidities</b>                                       |                 |                      |                                  |         |
| • Diabetes mellitus                                        | 122 (28%)       | 377(22%)             | 1.08 (0.87-1.35)                 | 0.49    |
| • Chronic kidney disease                                   | 84 (19%)        | 242 (14%)            | 1.23 (0.96-1.58)                 | 0.11    |
| • Liver disease                                            | 22 (5%)         | 57 (3%)              | 1.10 (0.71-1.70)                 | 0.68    |
| • Malignancy                                               | 19 (4%)         | 27 (2%)              | 2.90 (1.81-4.63)                 | <0.001  |
| <b>Blood culture positive for<br/>pathogenic organisms</b> | 110(26%)        | 225 (13%)            | 1.64 (1.31-2.05)                 | <0.001  |
| <b>Year</b>                                                |                 |                      |                                  |         |
| • 2015                                                     | 207 (48%)       | 808 (46%)            | 1                                | 0.08    |
| • 2016                                                     | 224 (52%)       | 931 (54%)            | 0.84 (0.69-1.02)                 |         |
| <b>Direct admission to the ICU</b>                         | 85 (20%)        | 124 (7%)             | 1.78 (1.37-2.32)                 | <0.001  |

112

113

1  
2  
3 114 **Supplementary Figure 1 | Preprinted recommended doctor orders for sepsis fast track**  
4  
5 115 **programme used at the Emergency Department at Sunpasitthiprasong Hospital**  
6  
7 116 **from 1 January 2015**  
8

**SAPPASITTIPRASONG HOSPITAL** รพ.6/1

**DOCTOR'S ORDER SHEET** (Rev. 2: พ.ร. 48)

| FFM                                            | PROGRESS NOTE                                                           | Date Time | ORDER FOR ONE DAY                                                                                                                                                                                                                                                                                                                                                                                                                                                                                                                         | Date Time | CONTINUOUS ORDER                                                                                                                                                                                                                                  | Date of Sign |
|------------------------------------------------|-------------------------------------------------------------------------|-----------|-------------------------------------------------------------------------------------------------------------------------------------------------------------------------------------------------------------------------------------------------------------------------------------------------------------------------------------------------------------------------------------------------------------------------------------------------------------------------------------------------------------------------------------------|-----------|---------------------------------------------------------------------------------------------------------------------------------------------------------------------------------------------------------------------------------------------------|--------------|
| HN.....<br>ชื่อ-สกุล.....<br>รหัสนิติบัตร..... | ER NON TRAUMA                                                           |           | Dx. <input type="checkbox"/> Sepsis <input type="checkbox"/> Severe Sepsis <input type="checkbox"/> Septic Shock<br>- Consult ICU Admit.....<br>- CxR<br>- EKG.....<br>- DTX. Stat.....<br>- Serum lactate .....<br>- CBC, PT, PTT, U/A<br>- BUN, Cr., E'lyte<br>- Liver Function Test,alb<br>- HC x II stat at ER.....ม.<br>- HC x II at รพ.....ม.<br>- V/S q 1 hr. x II then as usual<br>- on O2 canular 3 LPM if O2 sat < 95 %<br>- Retained Foley's cath<br>- NSS1,000 ml IV load.....in 10 min<br>then IV drip ..... ml/hr (30ml/kg) |           | - NPO<br>- Record V/S, N/S, I/O<br><br><b>Medication</b><br>ชัก Hx เพื่อยา <input type="checkbox"/> ไม่มี<br><input type="checkbox"/> มี.....<br>ตรวจสอบ Hx เพื่อยา ใน HOMC<br><input type="checkbox"/> ไม่มี<br><input type="checkbox"/> มี..... |              |
|                                                | Time onset                                                              |           |                                                                                                                                                                                                                                                                                                                                                                                                                                                                                                                                           |           |                                                                                                                                                                                                                                                   |              |
|                                                | Date                                                                    |           |                                                                                                                                                                                                                                                                                                                                                                                                                                                                                                                                           |           |                                                                                                                                                                                                                                                   |              |
|                                                | Time                                                                    |           |                                                                                                                                                                                                                                                                                                                                                                                                                                                                                                                                           |           |                                                                                                                                                                                                                                                   |              |
|                                                | Onset                                                                   |           |                                                                                                                                                                                                                                                                                                                                                                                                                                                                                                                                           |           |                                                                                                                                                                                                                                                   |              |
|                                                | Date                                                                    |           |                                                                                                                                                                                                                                                                                                                                                                                                                                                                                                                                           |           |                                                                                                                                                                                                                                                   |              |
|                                                | Time                                                                    |           |                                                                                                                                                                                                                                                                                                                                                                                                                                                                                                                                           |           |                                                                                                                                                                                                                                                   |              |
|                                                | E V M                                                                   |           |                                                                                                                                                                                                                                                                                                                                                                                                                                                                                                                                           |           |                                                                                                                                                                                                                                                   |              |
|                                                | BP /                                                                    |           |                                                                                                                                                                                                                                                                                                                                                                                                                                                                                                                                           |           |                                                                                                                                                                                                                                                   |              |
|                                                | HR T C                                                                  |           |                                                                                                                                                                                                                                                                                                                                                                                                                                                                                                                                           |           |                                                                                                                                                                                                                                                   |              |
|                                                | Source of infection                                                     |           |                                                                                                                                                                                                                                                                                                                                                                                                                                                                                                                                           |           |                                                                                                                                                                                                                                                   |              |
|                                                | <input type="checkbox"/> Respiratory <input type="checkbox"/> GI        |           |                                                                                                                                                                                                                                                                                                                                                                                                                                                                                                                                           |           |                                                                                                                                                                                                                                                   |              |
|                                                | <input type="checkbox"/> Skin, soft tissue <input type="checkbox"/> CNS |           |                                                                                                                                                                                                                                                                                                                                                                                                                                                                                                                                           |           |                                                                                                                                                                                                                                                   |              |
|                                                | <input type="checkbox"/> Cardiovascular                                 |           |                                                                                                                                                                                                                                                                                                                                                                                                                                                                                                                                           |           |                                                                                                                                                                                                                                                   |              |
|                                                | <input type="checkbox"/> Others.....                                    |           |                                                                                                                                                                                                                                                                                                                                                                                                                                                                                                                                           |           |                                                                                                                                                                                                                                                   |              |
|                                                | Systemic infection                                                      |           |                                                                                                                                                                                                                                                                                                                                                                                                                                                                                                                                           |           |                                                                                                                                                                                                                                                   |              |
|                                                | <input type="checkbox"/> Leptospirosis <input type="checkbox"/> Malaria |           |                                                                                                                                                                                                                                                                                                                                                                                                                                                                                                                                           |           |                                                                                                                                                                                                                                                   |              |
|                                                | <input type="checkbox"/> Rickettsia <input type="checkbox"/> Denque     |           |                                                                                                                                                                                                                                                                                                                                                                                                                                                                                                                                           |           |                                                                                                                                                                                                                                                   |              |
|                                                | พียง IV bolus.....ml                                                    |           |                                                                                                                                                                                                                                                                                                                                                                                                                                                                                                                                           |           |                                                                                                                                                                                                                                                   |              |
|                                                | BP / HR                                                                 |           |                                                                                                                                                                                                                                                                                                                                                                                                                                                                                                                                           |           |                                                                                                                                                                                                                                                   |              |
| IVF รพ.....ml                                  |                                                                         |           |                                                                                                                                                                                                                                                                                                                                                                                                                                                                                                                                           |           |                                                                                                                                                                                                                                                   |              |
| IVF at ER.....ml                               |                                                                         |           |                                                                                                                                                                                                                                                                                                                                                                                                                                                                                                                                           |           |                                                                                                                                                                                                                                                   |              |

117

118 **Supplementary Figure 2 | The Sepsis Fast Track sepsis resuscitation workflow used at the**  
 119 **Emergency Department at Sunpasitthiprasong Hospital from 1 March 2016**

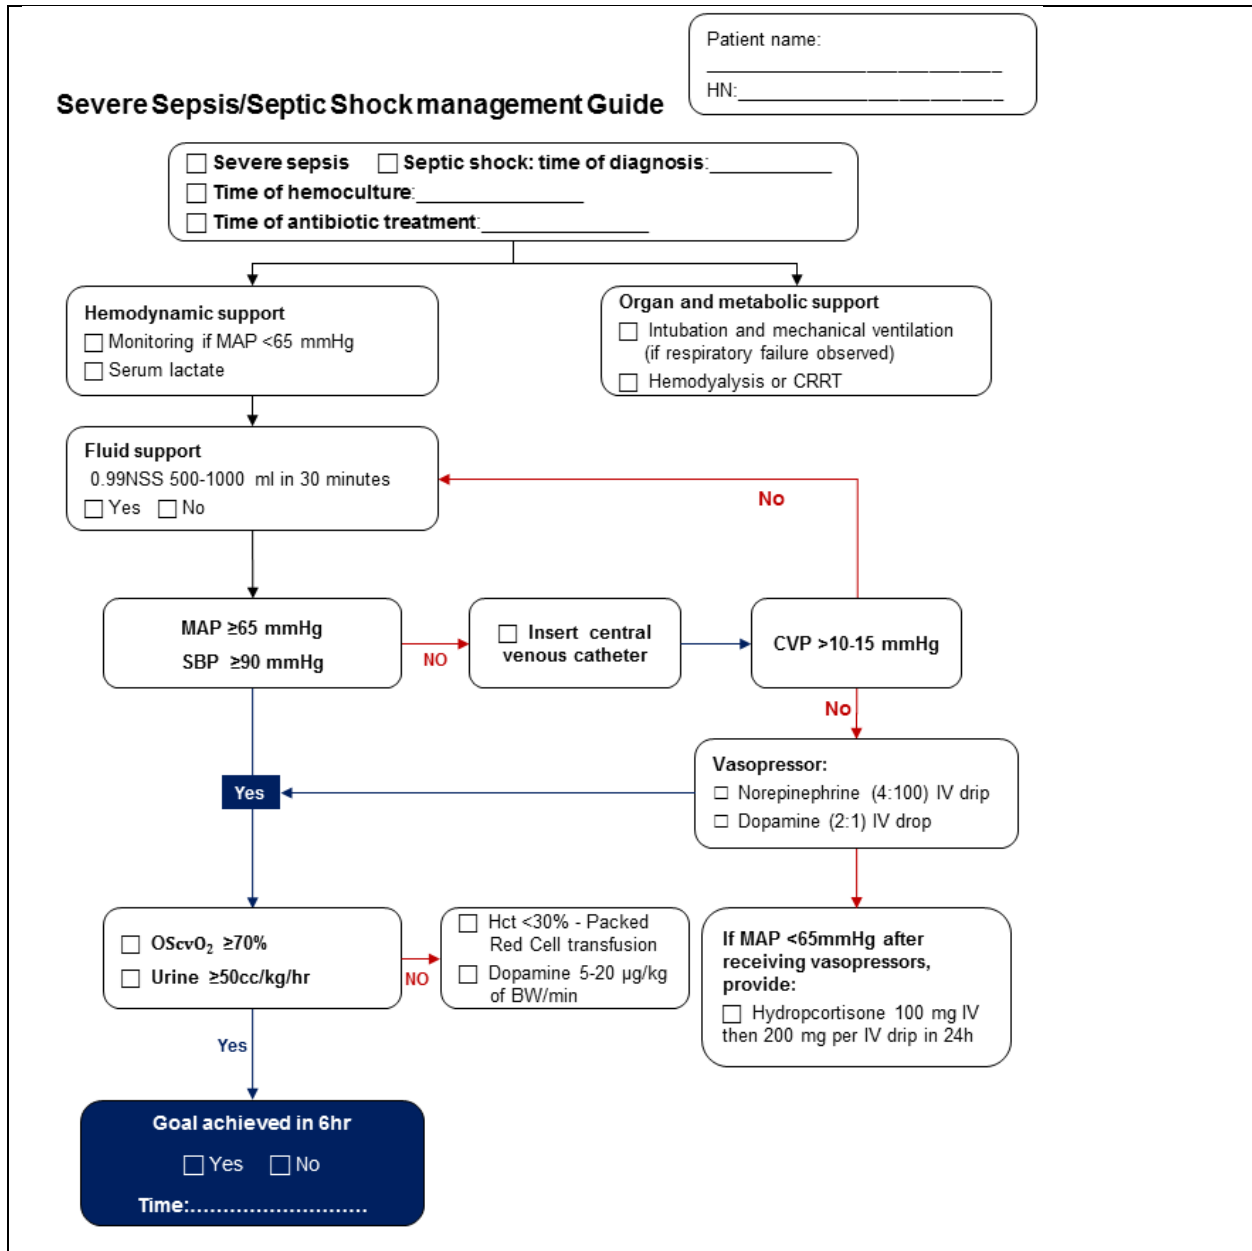

120

121

122

**STROBE Statement**

## Checklist of items that should be included in reports of observational studies

| Section/Topic                                                                                      | Item No | Recommendation                                                                                                                                                                             | Reported on Page No |
|----------------------------------------------------------------------------------------------------|---------|--------------------------------------------------------------------------------------------------------------------------------------------------------------------------------------------|---------------------|
| <b>Title and abstract</b>                                                                          | 1       | (a) Indicate the study's design with a commonly used term in the title or the abstract                                                                                                     | 1, 3-4              |
|                                                                                                    |         | (b) Provide in the abstract an informative and balanced summary of what was done and what was found                                                                                        | 3-4                 |
| <b>Introduction</b>                                                                                |         |                                                                                                                                                                                            |                     |
| Background/rationale                                                                               | 2       | Explain the scientific background and rationale for the investigation being reported                                                                                                       | 5-6                 |
| Objectives                                                                                         | 3       | State specific objectives, including any prespecified hypotheses                                                                                                                           | 6                   |
| <b>Methods</b>                                                                                     |         |                                                                                                                                                                                            |                     |
| Study design                                                                                       | 4       | Present key elements of study design early in the paper                                                                                                                                    | 6-7                 |
| Setting                                                                                            | 5       | Describe the setting, locations, and relevant dates, including periods of recruitment, exposure, follow-up, and data collection                                                            | 6-7                 |
| Participants                                                                                       | 6       | (a) <i>Cohort study</i> —Give the eligibility criteria, and the sources and methods of selection of participants. Describe methods of follow-up                                            | 8-9                 |
|                                                                                                    |         | <i>Case-control study</i> —Give the eligibility criteria, and the sources and methods of case ascertainment and control selection. Give the rationale for the choice of cases and controls |                     |
|                                                                                                    |         | <i>Cross-sectional study</i> —Give the eligibility criteria, and the sources and methods of selection of participants                                                                      |                     |
| Variables                                                                                          | 7       | (b) <i>Cohort study</i> —For matched studies, give matching criteria and number of exposed and unexposed                                                                                   | 10-11               |
|                                                                                                    |         | <i>Case-control study</i> —For matched studies, give matching criteria and the number of controls per case                                                                                 |                     |
| Data sources/measurement                                                                           | 8*      | Clearly define all outcomes, exposures, predictors, potential confounders, and effect modifiers. Give diagnostic criteria, if applicable                                                   | 10-11               |
| Bias                                                                                               | 9       | For each variable of interest, give sources of data and details of methods of assessment (measurement). Describe comparability of assessment methods if there is more than one group       | 11-12               |
| Study size                                                                                         | 10      | Describe any efforts to address potential sources of bias                                                                                                                                  | 11-12               |
| Quantitative variables                                                                             | 11      | Explain how the study size was arrived at                                                                                                                                                  | 10-11               |
| Statistical methods                                                                                | 12      | Explain how quantitative variables were handled in the analyses. If applicable, describe which groupings were chosen and why                                                               | 11-12               |
|                                                                                                    |         | (a) Describe all statistical methods, including those used to control for confounding                                                                                                      | 11-12               |
|                                                                                                    |         | (b) Describe any methods used to examine subgroups and interactions                                                                                                                        | 11-12               |
|                                                                                                    |         | (c) Explain how missing data were addressed                                                                                                                                                | 8                   |
|                                                                                                    |         | (d) <i>Cohort study</i> —If applicable, explain how loss to follow-up was addressed                                                                                                        | 6                   |
| <i>Case-control study</i> —If applicable, explain how matching of cases and controls was addressed |         |                                                                                                                                                                                            |                     |
|                                                                                                    |         | <i>Cross-sectional study</i> —If applicable, describe analytical methods taking account of sampling strategy                                                                               | 12                  |
|                                                                                                    |         | (e) Describe any sensitivity analyses                                                                                                                                                      | 12                  |

| Section/Topic            | Item No | Recommendation                                                                                                                                                                                               | Reported on Page No |
|--------------------------|---------|--------------------------------------------------------------------------------------------------------------------------------------------------------------------------------------------------------------|---------------------|
| <b>Results</b>           |         |                                                                                                                                                                                                              |                     |
| Participants             | 13*     | (a) Report numbers of individuals at each stage of study—eg numbers potentially eligible, examined for eligibility, confirmed eligible, included in the study, completing follow-up, and analysed            | 13                  |
|                          |         | (b) Give reasons for non-participation at each stage                                                                                                                                                         |                     |
|                          |         | (c) Consider use of a flow diagram                                                                                                                                                                           |                     |
| Descriptive data         | 14*     | (a) Give characteristics of study participants (eg demographic, clinical, social) and information on exposures and potential confounders                                                                     | 13-14               |
|                          |         | (b) Indicate number of participants with missing data for each variable of interest                                                                                                                          |                     |
|                          |         | (c) <i>Cohort study</i> —Summarise follow-up time (eg, average and total amount)                                                                                                                             |                     |
| Outcome data             | 15*     | <i>Cohort study</i> —Report numbers of outcome events or summary measures over time                                                                                                                          | 16-17               |
|                          |         | <i>Case-control study</i> —Report numbers in each exposure category, or summary measures of exposure                                                                                                         |                     |
|                          |         | <i>Cross-sectional study</i> —Report numbers of outcome events or summary measures                                                                                                                           |                     |
| Main results             | 16      | (a) Give unadjusted estimates and, if applicable, confounder-adjusted estimates and their precision (eg, 95% confidence interval). Make clear which confounders were adjusted for and why they were included | 13-17               |
|                          |         | (b) Report category boundaries when continuous variables were categorized                                                                                                                                    |                     |
|                          |         | (c) If relevant, consider translating estimates of relative risk into absolute risk for a meaningful time period                                                                                             |                     |
| Other analyses           | 17      | Report other analyses done—eg analyses of subgroups and interactions, and sensitivity analyses                                                                                                               | 16-17               |
| <b>Discussion</b>        |         |                                                                                                                                                                                                              |                     |
| Key results              | 18      | Summarise key results with reference to study objectives                                                                                                                                                     | 18-22               |
| Limitations              | 19      | Discuss limitations of the study, taking into account sources of potential bias or imprecision. Discuss both direction and magnitude of any potential bias                                                   | 20-21               |
| Interpretation           | 20      | Give a cautious overall interpretation of results considering objectives, limitations, multiplicity of analyses, results from similar studies, and other relevant evidence                                   | 20-21               |
| Generalisability         | 21      | Discuss the generalisability (external validity) of the study results                                                                                                                                        | 21-22               |
| <b>Other Information</b> |         |                                                                                                                                                                                                              |                     |
| Funding                  | 22      | Give the source of funding and the role of the funders for the present study and, if applicable, for the original study on which the present article is based                                                | 23                  |

\*Give information separately for cases and controls in case-control studies and, if applicable, for exposed and unexposed groups in cohort and cross-sectional studies.

**Note:** An Explanation and Elaboration article discusses each checklist item and gives methodological background and published examples of transparent reporting. The STROBE checklist is best used in conjunction with this article (freely available on the Web sites of PLoS Medicine at <http://www.plosmedicine.org/>, Annals of Internal Medicine at <http://www.annals.org/>, and Epidemiology at <http://www.epidem.com/>). Information on the STROBE Initiative is available at [www.strobe-statement.org](http://www.strobe-statement.org).
