# Supplementary material for: Effectiveness of a sepsis programme in a resource-limited setting: a retrospective analysis of data of a prospective observational study (Ubon-sepsis)
Source: PubMed Central journal article supplement (PMC7896572; doi:10.1136/bmjopen-2020-041022), 2021-02-18
Supplement: bmjopen-2020-041022supp001.pdf [file bmjopen-2020-041022supp001.pdf]

1 **Effectiveness of a sepsis programme in a resource-limited setting: a retrospective analysis of**  
2 **data of a prospective observational study (Ubon-sepsis)**

3

4 Suchart Booraphun MD<sup>1</sup>, Viriya Hantrakun PhD<sup>2</sup>, Suwatthiya Siriboon MD<sup>1</sup>, Chaiyaporn Boonsri  
5 MD<sup>1</sup>, Pulyamon Poomthong MD<sup>1</sup>, Bung-Orn Singkaew BNS<sup>1</sup>, Oratai Wasombat BNS<sup>1</sup>, Parinya  
6 Chamnan MD, PhD<sup>1</sup>, Ratapum Champunot MD<sup>3</sup>, Kristina Rudd MD, MPH<sup>4,5</sup>, Nicholas PJ. Day<sup>2,6</sup>  
7 MD<sup>2</sup>, PhD, Arjen M. Dondorp MD, PhD<sup>2,6</sup>, Prapit Teparrukkul MD<sup>1</sup>, T. Eoin West MD, MPH<sup>5,7</sup>,  
8 Direk Limmathurotsakul MD, PhD<sup>2,6,8</sup>

9

10 Short Title: Sepsis Fast Track Thailand

11

12 <sup>1</sup>Sunpasitthiprasong Hospital, Ubon Ratchathani, Thailand

13 <sup>2</sup>Mahidol Oxford Tropical Medicine Research Unit, Faculty of Tropical Medicine, Mahidol  
14 University, Bangkok, Thailand

15 <sup>3</sup>Department of Internal Medicine, Buddhachinaraj Phitsanulok Hospital, Phitsanulok, Thailand

16 <sup>4</sup>Department of Critical Care Medicine, University of Pittsburgh, Pittsburgh, Pennsylvania, USA

17 <sup>5</sup>Division of Pulmonary, Critical Care, and Sleep Medicine, University of Washington, Seattle,  
18 United States

19 <sup>6</sup>Centre for Tropical Medicine and Global Health, Nuffield Department of Medicine, University  
20 of Oxford, Churchill Hospital, Oxford, United Kingdom

21 <sup>7</sup>Department of Microbiology and Immunology, Faculty of Tropical Medicine, Mahidol  
22 University, Bangkok, Thailand

23 <sup>8</sup>Department of Tropical Hygiene, Faculty of Tropical Medicine, Mahidol University, Bangkok,  
24 Thailand

25 **Supplementary Table 1 | Criteria used to systematically enroll patients into Sepsis Fast Track**26 **(SFT) upon admission**27 **1. Present with 2 or more of below Signs of systemic inflammatory response syndrome**  
28 **(SIRS)**

- 29
- Body temperature > 38.3 °C or < 36.0 °C
  - Heart rate > 90 bpm
  - Respiratory rate > 20 pm or PaCO<sub>2</sub> < 32 mmHg
  - WBC > 12,000 /μL or < 4,000 /μL or Band forms > 10%

33 **2. Suspected sources of infection**

- 34
- Pneumonia
  - Urinary track infection
  - Intra-abdominal infection
  - Skin and soft tissue infection
  - CNS infection
  - Others infections or unspecified source of infection

40 **3. Diagnostic criteria for severe sepsis:** patient met criteria in no 1 and 2 and has at least  
41 one of the following criteria

- 42
- Mottled skin
  - Capillary refilling time ≥ 3 seconds
  - Urine output < 0.5 ml/kg/hour
  - Abrupt change in mental status
  - Acute respiratory failure
  - Platelet count < 100,000 /μL
  - Disseminated intravascular coagulation
  - Lactate > 2 mmol/L
  - SBP < 90 mmHg or MAP < 65 mmHg

51 **4. Diagnostic criteria for septic shock:** patient who are severe sepsis and has at least 1 of  
52 the following criteria

- 53
- SBP < 90 mmHg or MAP < 65 mmHg after crystalliod administration ≥ 40-60 ml/kg of body weight OR after colloid administration ≥ 20-30 ml/kg of body weight
  - Require administration of dopamine > 5μg/kg of BW/min or norepinephrine/epinephrine > 0.02 μg/kg of BW/min to maintain MAP to be > 65 mmHg

57

58 **Supplementary Table 2 | Systemic manifestation of infection criteria used for enrollment in**59 **Ubon-Sepsis Cohort**60 **General parameters**

- 61 1. Fever or hypothermia (Core body temperature defined as  $> 38.3$  °C or  $< 36.0$  °C)
- 62 2. Tachycardia (heart rate  $> 90$  beats per minute)
- 63 3. Tachypnea (respiratory rate  $> 20$  per minute)
- 64 4. Altered mental status with Glasgow Coma Score (GCS)  $< 15$  or  $< 10$  if intubated
- 65 5. Hyperglycemia (plasma glucose  $> 140$  mg/dL) in the absence of diabetes

66 **Inflammatory parameters**

- 67 6. Leukocytosis (white blood cell count  $> 12,000/\mu\text{L}$ ), leukopenia (white blood cell count  $< 4000/\mu\text{L}$ ) or immature forms  $> 10\%$
- 69 7. Plasma C-reactive protein  $> 2$  SD above the normal value
- 70 8. Plasma procalcitonin  $> 2$  SD above the normal value

71 **Hemodynamic parameters**

- 72 9. Arterial hypotension (systolic blood pressure (SBP)  $< 90$  mmHg, mean arterial pressure (MAP)  $< 70$  mmHg, or SBP decrease  $> 40$  mmHg)

74 **Organ dysfunction parameters**

- 75 10. Low oxygen saturation determined by pulse oximetry ( $\text{SpO}_2 < 95\%$ ) determined by pulse oximetry
- 77 11. Arterial hypoxemia ( $\text{PaO}_2 / \text{FIO}_2 < 300$ )
- 78 12. Acute oliguria (urine output  $< 0.5$  mL/kg/hr or 45 mmol/L for 2 hours)
- 79 13. Creatinine increase  $> 0.5$  mg/dL
- 80 14. Coagulation abnormalities (international normalised ratio  $> 1.5$  or activated partial thromboplastin time  $> 60$  seconds)
- 82 15. Thrombocytopenia (Platelet count  $< 100,000$  cells/ $\mu\text{L}$ )
- 83 16. Ileus (absent bowel sounds)
- 84 17. Hyperbilirubinaemia (plasma total bilirubin  $> 4$  mg/dL)

85 **Tissue perfusion parameters**

- 86 18. Hyperlactatemia ( $> 1$  mmol/L)
- 87 19. Decreased capillary refill or mottling
- 88 20. Significant edema or positive fluid balance

89

90 **Supplementary Table 3 | Factors associated with 28-day mortality using multivariable Cox**  
 91 **proportional hazards model**

| Variables                                              | Died<br>(n=779) | Survived<br>(n=3027) | Adjusted hazard ratio<br>(95% CI) | P value |
|--------------------------------------------------------|-----------------|----------------------|-----------------------------------|---------|
| <b>SFT group<sup>1</sup></b>                           | 205 (26%)       | 698 (23%)            | 0.72 (0.58-0.88)                  | 0.001   |
| <b>Male gender</b>                                     | 445 (57%)       | 698 (23%)            | 0.87 (0.75-1.01)                  | 0.06    |
| <b>Age group (years) (n [%])</b>                       |                 |                      |                                   |         |
| • 18-40                                                | 59 (8%)         | 688 (23%)            | 1                                 | <0.001  |
| • >40-60                                               | 222 (29%)       | 930 (31%)            | 1.72 (1.28-2.30)                  |         |
| • >60-70                                               | 159 (20%)       | 568 (19%)            | 2.10 (1.54-2.86)                  |         |
| • >70                                                  | 339 (44%)       | 841 (28%)            | 3.41 (2.57-4.53)                  |         |
| <b>Transferred from other hospital</b>                 | 715 (92%)       | 2595 (86%)           | 1.14 (0.88-1.49)                  | 0.33    |
| <b>Modified SOFA score (median, IQR)</b>               | 6 (4-9)         | 4 (3-6)              | 1.23 (1.21-1.26)                  | <0.001  |
| <b>Comorbidities</b>                                   |                 |                      |                                   |         |
| • Diabetes mellitus                                    | 205 (26%)       | 602 (20%)            | 1.06 (0.90-1.26)                  | 0.47    |
| • Chronic kidney disease                               | 141 (18%)       | 379 (13%)            | 1.22 (1.01-1.48)                  | 0.04    |
| • Liver disease                                        | 39 (5%)         | 85 (3%)              | 1.27 (0.91-1.76)                  | 0.16    |
| • Malignancy                                           | 24 (3%)         | 36 (1%)              | 2.64 (1.75-3.99)                  | <0.001  |
| <b>Blood culture positive for pathogenic organisms</b> | 190 (24%)       | 332 (11%)            | 1.83 (1.55-2.17)                  | <0.001  |
| <b>Year</b>                                            |                 |                      |                                   |         |
| • 2013                                                 | 165 (21%)       | 637 (21%)            | 1                                 | 0.30    |
| • 2014                                                 | 183 (23%)       | 651 (22%)            | 1.03 (0.83-1.27)                  |         |
| • 2015                                                 | 207 (27%)       | 808 (27%)            | 1.05 (0.84-1.31)                  |         |
| • 2016 <sup>2</sup>                                    | 224 (29%)       | 931 (31%)            | 0.88 (0.70-1.11)                  |         |
| <b>Direct admission to the ICU</b>                     | 128 (16%)       | 170 (6%)             | 1.68 (1.36-2.06)                  | <0.001  |

92 <sup>1</sup> Enrolled in the Sepsis Fast Track (SFT) programme

93 <sup>2</sup> Included 28 patients in 2017

94

95 **Supplementary Table 4 | Factors associated with 28-day mortality using multivariable Cox**  
 96 **proportional hazards model without a variable of the direct admission to the ICU**

| Variables                                              | Died<br>(n=779) | Survived<br>(n=3027) | Adjusted hazard ratio<br>(95% CI) | P value |
|--------------------------------------------------------|-----------------|----------------------|-----------------------------------|---------|
| <b>SFT group<sup>1</sup></b>                           | 205 (26%)       | 698 (23%)            | 0.77 (0.63-0.94)                  | 0.01    |
| <b>Male gender</b>                                     | 445 (57%)       | 698 (23%)            | 0.86 (0.74-1.00)                  | 0.05    |
| <b>Age group (years) (n [%])</b>                       |                 |                      |                                   |         |
| • 18-40                                                | 59 (8%)         | 688 (23%)            | 1                                 | <0.001  |
| • >40-60                                               | 222 (29%)       | 930 (31%)            | 1.69 (1.26-2.26)                  |         |
| • >60-70                                               | 159 (20%)       | 568 (19%)            | 2.07 (1.52-2.81)                  |         |
| • >70                                                  | 339 (44%)       | 841 (28%)            | 3.32 (2.50-4.41)                  |         |
| <b>Transferred from other hospital</b>                 | 715 (92%)       | 2595 (86%)           | 1.16 (0.89-1.52)                  | 0.26    |
| <b>Modified SOFA score (median, IQR)</b>               | 6 (4-9)         | 4 (3-6)              | 1.25 (1.22-1.27)                  | <0.001  |
| <b>Comorbidities</b>                                   |                 |                      |                                   |         |
| • Diabetes mellitus                                    | 205 (26%)       | 602 (20%)            | 1.08 (0.91-1.27)                  | 0.39    |
| • Chronic kidney disease                               | 141 (18%)       | 379 (13%)            | 1.20 (0.99-1.45)                  | 0.07    |
| • Liver disease                                        | 39 (5%)         | 85 (3%)              | 1.24 (0.89-1.72)                  | 0.20    |
| • Malignancy                                           | 24 (3%)         | 36 (1%)              | 2.52 (1.67-3.81)                  | <0.001  |
| <b>Blood culture positive for pathogenic organisms</b> | 190 (24%)       | 332 (11%)            | 1.83 (1.54-2.16)                  | <0.001  |
| <b>Year</b>                                            |                 |                      |                                   |         |
| • 2013                                                 | 165 (21%)       | 637 (21%)            | 1                                 | 0.34    |
| • 2014                                                 | 183 (23%)       | 651 (22%)            | 0.98 (0.79-1.21)                  |         |
| • 2015                                                 | 207 (27%)       | 808 (27%)            | 1.01 (0.81-1.26)                  |         |
| • 2016 <sup>2</sup>                                    | 224 (29%)       | 931 (31%)            | 0.85 (0.68-1.07)                  |         |

97 <sup>1</sup> Enrolled in the Sepsis Fast Track (SFT) programme

98 <sup>2</sup> Included 28 patients in 2017

99 **Supplementary Table 5 | Factors associated with 28-day mortality using logistic**  
 100 **multivariable model**

| Variables                                              | Died<br>(n=779) | Survived<br>(n=3027) | Adjusted odds ratio<br>(95% CI) | P value |
|--------------------------------------------------------|-----------------|----------------------|---------------------------------|---------|
| <b>SFT group<sup>1</sup></b>                           | 205 (26%)       | 698 (23%)            | 0.61 (0.48-0.79)                | <0.001  |
| <b>Male gender</b>                                     | 445 (57%)       | 698 (23%)            | 0.88 (0.73-1.06)                | 0.18    |
| <b>Age group (years) (n [%])</b>                       |                 |                      |                                 |         |
| • 18-40                                                | 59 (8%)         | 688 (23%)            | 1                               | <0.001  |
| • >40-60                                               | 222 (29%)       | 930 (31%)            | 1.91 (1.36-2.66)                |         |
| • >60-70                                               | 159 (20%)       | 568 (19%)            | 2.54 (1.78-3.63)                |         |
| • >70                                                  | 339 (44%)       | 841 (28%)            | 4.76 (3.43-6.59)                |         |
| <b>Transferred from other hospital</b>                 | 715 (92%)       | 2595 (86%)           | 1.21 (0.89-1.65)                | 0.23    |
| <b>Modified SOFA score (median, IQR)</b>               | 6 (4-9)         | 4 (3-6)              | 1.30 (1.26-1.34)                | <0.001  |
| <b>Comorbidities</b>                                   |                 |                      |                                 |         |
| • Diabetes mellitus                                    | 205 (26%)       | 602 (20%)            | 1.12 (0.91-1.39)                | 0.29    |
| • Chronic kidney disease                               | 141 (18%)       | 379 (13%)            | 1.20 (0.94-1.53)                | 0.13    |
| • Liver disease                                        | 39 (5%)         | 85 (3%)              | 1.34 (0.85-2.10)                | 0.21    |
| • Malignancy                                           | 24 (3%)         | 36 (1%)              | 3.65 (2.05-6.51)                | <0.001  |
| <b>Blood culture positive for pathogenic organisms</b> | 190 (24%)       | 332 (11%)            | 2.08 (1.66-2.61)                | <0.001  |
| <b>Year</b>                                            |                 |                      |                                 |         |
| • 2013                                                 | 165 (21%)       | 637 (21%)            | 1                               | 0.64    |
| • 2014                                                 | 183 (23%)       | 651 (22%)            | 1.05 (0.80-1.37)                |         |
| • 2015                                                 | 207 (27%)       | 808 (27%)            | 1.05 (0.80-1.38)                |         |
| • 2016 <sup>2</sup>                                    | 224 (29%)       | 931 (31%)            | 0.91 (0.69-1.21)                |         |
| <b>Admitted directly to an ICU upon admission</b>      | 128 (16%)       | 170 (6%)             | 1.95 (1.45-2.62)                | <0.001  |

101 <sup>1</sup> Enrolled in the Sepsis Fast Track (SFT) programme

102 <sup>2</sup> Included 28 patients in 2017

103

104 **Supplementary Table 6 | Factors associated with 28-day mortality using logistic**  
 105 **multivariable model without a variable of the direct admission to the ICU**

| Variables                                              | Died<br>(n=779) | Survived<br>(n=3027) | Adjusted odds ratio<br>(95% CI) | P value |
|--------------------------------------------------------|-----------------|----------------------|---------------------------------|---------|
| <b>SFT group<sup>1</sup></b>                           | 205 (26%)       | 698 (23%)            | 0.67 (0.53-0.86)                | 0.002   |
| <b>Male gender</b>                                     | 445 (57%)       | 698 (23%)            | 0.87 (0.73-1.05)                | 0.14    |
| <b>Age group (years) (n [%])</b>                       |                 |                      |                                 |         |
| • 18-40                                                | 59 (8%)         | 688 (23%)            | 1                               | <0.001  |
| • >40-60                                               | 222 (29%)       | 930 (31%)            | 1.85 (1.33-2.58)                |         |
| • >60-70                                               | 159 (20%)       | 568 (19%)            | 2.44 (1.71-3.46)                |         |
| • >70                                                  | 339 (44%)       | 841 (28%)            | 4.55 (3.29-6.28)                |         |
| <b>Transferred from other hospital</b>                 | 715 (92%)       | 2595 (86%)           | 1.23 (0.90-1.68)                | 0.19    |
| <b>Modified SOFA score (median, IQR)</b>               | 6 (4-9)         | 4 (3-6)              | 1.32 (1.28-1.36)                | <0.001  |
| <b>Comorbidities</b>                                   |                 |                      |                                 |         |
| • Diabetes mellitus                                    | 205 (26%)       | 602 (20%)            | 1.16 (0.94-1.43)                | 0.17    |
| • Chronic kidney disease                               | 141 (18%)       | 379 (13%)            | 1.17 (0.92-1.49)                | 0.20    |
| • Liver disease                                        | 39 (5%)         | 85 (3%)              | 1.31 (0.84-2.06)                | 0.23    |
| • Malignancy                                           | 24 (3%)         | 36 (1%)              | 3.49 (1.95-6.24)                | <0.001  |
| <b>Blood culture positive for pathogenic organisms</b> | 190 (24%)       | 332 (11%)            | 2.08 (1.67-2.61)                | <0.001  |
| <b>Year</b>                                            |                 |                      |                                 |         |
| • 2013                                                 | 165 (21%)       | 637 (21%)            | 1                               | 0.70    |
| • 2014                                                 | 183 (23%)       | 651 (22%)            | 1.00 (0.77-1.31)                |         |
| • 2015                                                 | 207 (27%)       | 808 (27%)            | 1.01 (0.77-1.33)                |         |
| • 2016 <sup>2</sup>                                    | 224 (29%)       | 931 (31%)            | 0.89 (0.67-1.17)                |         |

106 <sup>1</sup> Enrolled in the Sepsis Fast Track (SFT) programme

107 <sup>2</sup> Included 28 patients in 2017

108

109 **Supplementary Table 7 | Factors associated with 28-day mortality using multivariable Cox**  
 110 **proportional hazards model in 2,170 patients enrolled into the study after the**  
 111 **implementation of the Sepsis Fast Track (SFT) programme**

| Variables                                              | Died<br>(n=431) | Survived<br>(n=1739) | Adjusted hazard ratio<br>(95% CI) | P value |
|--------------------------------------------------------|-----------------|----------------------|-----------------------------------|---------|
| <b>SFT group</b>                                       | 205 (48%)       | 698 (40%)            | 0.68 (0.55-0.84)                  | <0.001  |
| <b>Male gender</b>                                     | 254(59%)        | 992 (57%)            | 0.89 (0.73-1.09)                  | 0.26    |
| <b>Age group (years) (n [%])</b>                       |                 |                      |                                   |         |
| • 18-40                                                | 30 (7%)         | 363(21%)             | 1                                 | <0.001  |
| • >40-60                                               | 125 (29%)       | 502 (29%)            | 1.97 (1.31-2.95)                  |         |
| • >60-70                                               | 85 (20%)        | 359 (21%)            | 1.97 (1.28-3.03)                  |         |
| • >70                                                  | 191 (44%)       | 515 (30%)            | 3.33 (2.24-4.95)                  |         |
| <b>Transferred from other hospital</b>                 | 406 (94%)       | 1513 (87%)           | 1.49 (0.99-2.26)                  | 0.06    |
| <b>Modified SOFA score (median, IQR)</b>               | 7 (5-10)        | 4 (3-6)              | 1.24 (1.21-1.28)                  | <0.001  |
| <b>Comorbidities</b>                                   |                 |                      |                                   |         |
| • Diabetes mellitus                                    | 122 (28%)       | 377(22%)             | 1.08 (0.87-1.35)                  | 0.49    |
| • Chronic kidney disease                               | 84 (19%)        | 242 (14%)            | 1.23 (0.96-1.58)                  | 0.11    |
| • Liver disease                                        | 22 (5%)         | 57 (3%)              | 1.10 (0.71-1.70)                  | 0.68    |
| • Malignancy                                           | 19 (4%)         | 27 (2%)              | 2.90 (1.81-4.63)                  | <0.001  |
| <b>Blood culture positive for pathogenic organisms</b> | 110(26%)        | 225 (13%)            | 1.64 (1.31-2.05)                  | <0.001  |
| <b>Year</b>                                            |                 |                      |                                   |         |
| • 2015                                                 | 207 (48%)       | 808 (46%)            | 1                                 | 0.08    |
| • 2016                                                 | 224 (52%)       | 931 (54%)            | 0.84 (0.69-1.02)                  |         |
| <b>Direct admission to the ICU</b>                     | 85 (20%)        | 124 (7%)             | 1.78 (1.37-2.32)                  | <0.001  |

112

113



114 **Supplementary Figure 1 | Preprinted recommended doctor orders for sepsis fast track**  
 115 **programme used at the Emergency Department at Sunpasitthiprasong Hospital**  
 116 **from 1 January 2015**

| SAPPASITTHIPRASONG HOSPITAL |                                                                                                                                                                                                                                                      |           |                                                                                                                                                                                                                                                                                                                                                                                                                                                                                                                             |           |                                                                                                                                                                                                                                              |              |
|-----------------------------|------------------------------------------------------------------------------------------------------------------------------------------------------------------------------------------------------------------------------------------------------|-----------|-----------------------------------------------------------------------------------------------------------------------------------------------------------------------------------------------------------------------------------------------------------------------------------------------------------------------------------------------------------------------------------------------------------------------------------------------------------------------------------------------------------------------------|-----------|----------------------------------------------------------------------------------------------------------------------------------------------------------------------------------------------------------------------------------------------|--------------|
| DOCTOR'S ORDER SHEET        |                                                                                                                                                                                                                                                      |           |                                                                                                                                                                                                                                                                                                                                                                                                                                                                                                                             |           |                                                                                                                                                                                                                                              |              |
| (Rev. 2: พ.ศ. 48)           |                                                                                                                                                                                                                                                      |           |                                                                                                                                                                                                                                                                                                                                                                                                                                                                                                                             |           |                                                                                                                                                                                                                                              |              |
| FFM                         | PROGRESS NOTE                                                                                                                                                                                                                                        | Date Time | ORDER FOR ONE DAY                                                                                                                                                                                                                                                                                                                                                                                                                                                                                                           | Date Time | CONTINUOUS ORDER                                                                                                                                                                                                                             | Date of Sign |
|                             | ER NON TRAUMA                                                                                                                                                                                                                                        |           | Dx. <input type="checkbox"/> Sepsis <input type="checkbox"/> Severe Sepsis <input type="checkbox"/> Septic Shock<br>-Consult ICU Admit.....<br>- CxR.....<br>- EKG.....<br>- DTX. Stat.....<br>- Serum lactate.....<br>- CBC, PT, PTT, U/A.....<br>- BUN, Cr., E 'lyte.....<br>- Liver Function Test,alb.....<br>- HC x II stat at ER..... น.<br>- HC x II at รพพ..... น.<br>- V/S q 1 hr. x II then as usual<br>- on O2 canular 3 LPM if O2 sat < 95 %<br>- Retained Foley's cath<br>- NSS 1,000 ml IV load..... in 10 min |           | - NPO<br>- Record V/S, N/S, I/O<br><br><b>Medication</b><br>ชัก Hx แพทย์ <input type="checkbox"/> ไม่มี<br><input type="checkbox"/> มี.....<br>ตรวจสอบ Hx แพทย์ ในHOMC<br><input type="checkbox"/> ไม่มี<br><input type="checkbox"/> มี..... |              |
|                             | Time onset<br>Date<br>Time<br>Onset<br>Date<br>Time<br>E V M<br>BP /<br>HR T C<br>Source of infection<br><input type="checkbox"/> Respiratory <input type="checkbox"/> GI<br><input type="checkbox"/> Skin, soft tissue <input type="checkbox"/> CNS |           | then IV drip ..... ml/hr (30ml/kg)<br>- Levophed ..... IV drip ..... ml/hr<br>- Dopamine ..... IV drip ..... ml/hr<br><input type="checkbox"/> Ceftriaxone 2 gm IV stat ..... น.<br><input type="checkbox"/> Cefazidione 2 gm IV stat ..... น.<br><input type="checkbox"/> Cloxacilin 2 gm IV stat ..... น.<br><input type="checkbox"/> Metronidazole 500 mg IV stat ..... น.<br><input type="checkbox"/> Gentamicin 240 mg IV stat ..... น.<br>- Notify แพทย์รพพ                                                           |           |                                                                                                                                                                                                                                              |              |

117

118 **Supplementary Figure 2 | The Sepsis Fast Track sepsis resuscitation workflow used at the**  
 119 **Emergency Department at Sunpasitthiprasong Hospital from 1 March 2016**

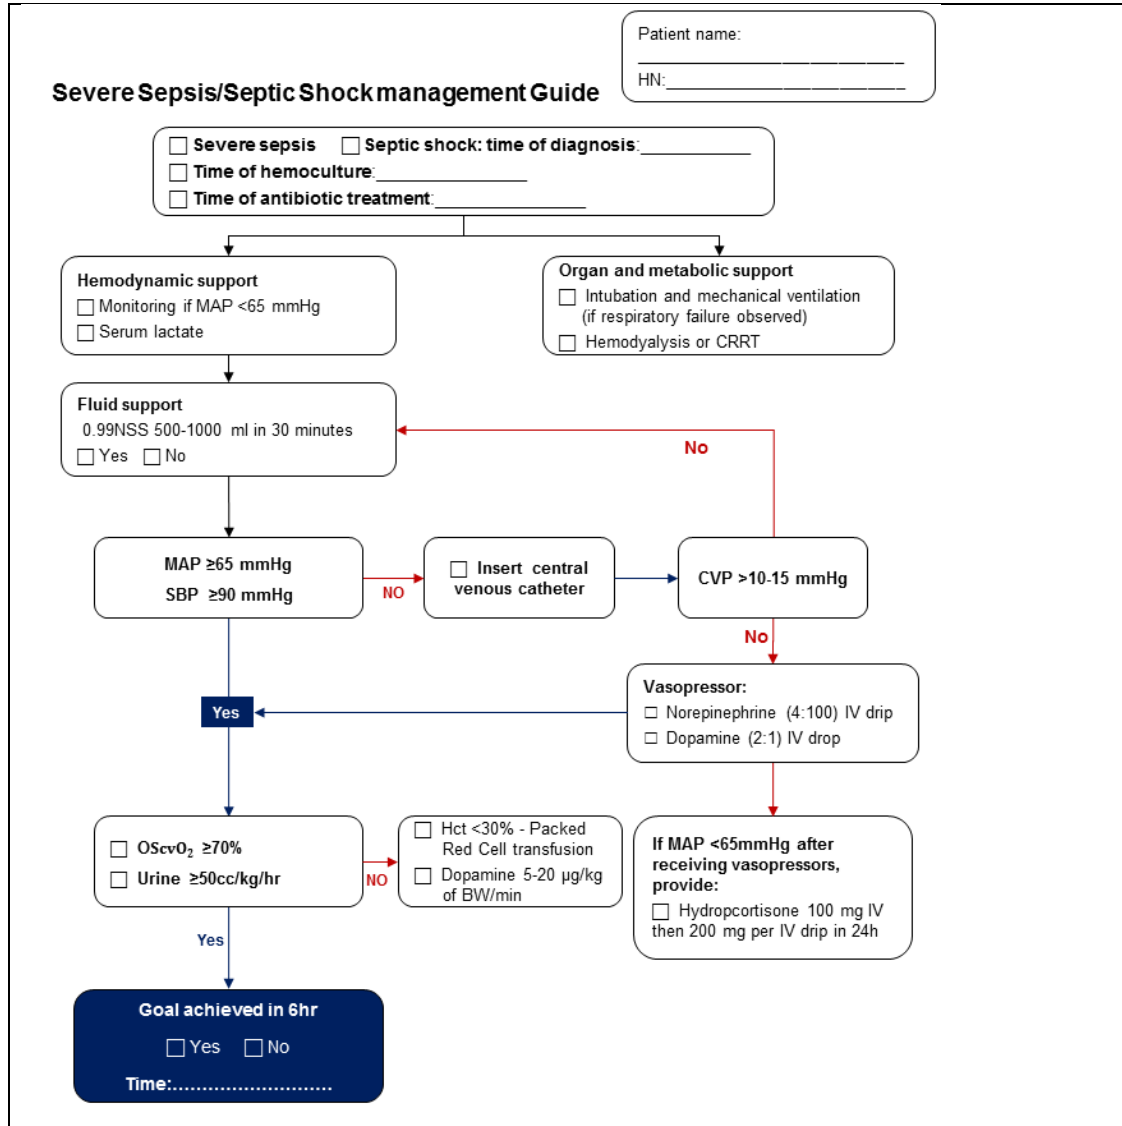

120  
 121  
 122
